# Supplementary material for: The biological activities of 5,15-diaryl-10,20-dihalogeno porphyrins for photodynamic therapy
Source: Research Square preprint supplement (doi:10.21203/rs.3.rs-1460073/v1), 2022-03-28
Supplement: Supplementary file 1 [file 3c319253c1de30051ae0a73a.docx]

**Supporting Material**

**The biological activities of 5,15-diaryl-10,20-dihalogeno porphyrins for photodynamic therapy**

Man Yi Li1, Le Mi1, Gennady Meerovich2, Yan Qiu2, Hui Jin2, Ting Chen1, Ni Ni Than3, Yi Jia Yan1*, Zhi Long Chen1*

1Department of pharmaceutical Science & Technology, College of Chemistry and Biology, Donghua University, Shanghai 201620, China.

2Prokhorov General Physics Institute of the Russian Academy of Sciences, Moscow 119435, Russia.

3Department of Chemistry, University of Yangon, Yangon 11041, Myanmar.

*Corresponding author: Zhi Long Chen, E-mail: zlchen1967@qq.com; Yi Jia Yan, E-mail: y_yan11@sina.com

**Table of contents**

1. The synthetic procedures of 5,15-diaryl-10,20-dihalogeno porphyrin derivatives S1-S8

2. 1H, 13C NMR and HRMS of target compounds S9-36

3. The generation rate of singlet oxygen of target compounds S37

4. The cell viabilities treated by different photosensitizers S37

**The synthetic procedures of 5,15-diaryl-10,20-dihalogeno porphyrin derivatives**

**Scheme S1.** The synthetic route of 5,15-diaryl-10,20-dihalogenated porphyrins **I1-6**. Reagents and reaction conditions: (a) dipyrromethane, TFA, DCM, 4 h; then DDQ, Et3N, 6 h; (b) NCS (or NBS), MeOH/DCM, room temperature; or I2, pyridine, bis(trifluoroacetoxy)iodobenzene, CHCl3, 48 h, in the dark, room temperature; (c) KOH, THF, 4 h, room temperature.

**General procedure for the synthesis of 2a-d**

Dipyrromethane (821 mg, 5.6 mmol) and compound **1a-d** (5.6 mmol) were dissolved in distilled CH2Cl2 (500 mL). Trifluoroacetic acid (0.28 mL, 3.7 mmol) was added dropwise to above solution under nitrogen, and the mixture was stirred at room temperature for 4 h. 2,3-Dicyano-5,6-dichlorobenzoquinone (DDQ) (1.525 g, 6.7 mmol) and triethylamine (8 mL) were added, and then the stirring of the mixture was continued for 8 h. The solvent was evaporated in vacuum and the resulting residue was purified by silica gel chromatography to afford purple solid **2a-d**.

5,15-Di((3-methoxycarbonylmethyl)phenyl) porphyrin (**2a**)

Aforementioned general procedure was followed to obtain the crude mixture which was purified by silica gel chromatography eluted with dichloromethane/petroleum ether (v/v = 3:1) to give the purple solid **2a** (714 mg, 42%). 1H NMR (400 MHz, CDCl3): δ ppm 10.32 (s, 2H), 9.40 (d, *J* = 4.6 Hz, 4H), 9.10 (d, *J* = 4.6 Hz, 4H), 8.24 (d, *J* = 7.8 Hz, 4H), 7.74 (d, *J* = 7.8 Hz, 4H), 4.02 (s, 4H), 3.91 (s, 6H), -3.10 (s, 2H).

5,15-Di((3-methoxycarbonylmethyl)phenyl)porphyrin (**2b**)

Aforementioned general procedure was followed to obtain the crude mixture which was purified by silica gel chromatography eluted with dichloromethane/petroleum ether (v/v = 3:1) to give the purple solid **2b** (761 mg, 45%). 1H NMR (400 MHz, CDCl3): δ ppm 10.32 (s, 2H), 9.41 (d, *J* = 4.6 Hz, 4H), 9.11 (d, *J* = 4.6 Hz, 4H), 8.21 (s, 4H), 7.79 - 7.73 (m, 4H), 3.97 (s, 4H), 3.84 (s, 6H), -3.11 (s, 2H).

5,15-Di((3-ethoxycarbonylmethoxy)phenyl)porphyrin (**2c**)

Aforementioned general procedure was followed to obtain the crude mixture which was purified by silica gel chromatography eluted with CH2Cl2 to give the purple solid **2c** (1.094 g, 58%). 1H NMR (400 MHz, CDCl3): δ ppm 10.33 (s, 2H), 9.40 (d, *J* = 3.5 Hz, 4H), 9.12 (d, 4H), 7.93 (d, *J* = 6.0 Hz, 2H), 7.83 (s, 2H), 7.76-7.70 (m, 2H), 7.40 (d, *J* = 8.1 Hz, 2H), 4.86 (s, 4H), 4.15 (q, *J* = 7.2 Hz, 4H), 1.28 (t, 6H), -3.16 (s, 2H).

5,15-Di((3-ethoxycarbonylpropoxy)phenyl) porphyrin (**2d**)

Aforementioned general procedure was followed to obtain the crude mixture which was purified by silica gel chromatography eluted with dichloromethane/petroleum ether (v/v = 3:1) to give the purple solid **2d** (1.062 g, 52%). 1H NMR (400 MHz, CDCl3): δ ppm 10.34 (s, 2H), 9.42 (d, *J* = 4.6 Hz, 4H), 9.17 (d, *J* = 4.6 Hz, 4H), 7.91 (d, *J* = 7.4 Hz, 2H), 7.87 (s, 2H), 7.76-7.70 (m, 2H), 7.39 (dd, *J* = 8.3, 1.8 Hz, 2H), 4.27 (t, *J* = 6.1 Hz, 4H), 4.20 (q, *J* = 7.1 Hz, 4H), 2.66 (t, *J* = 7.3 Hz, 4H), 2.31-2.24 (m, 4H), 1.29 (t, *J* = 7.2 Hz, 6H), -3.08 (s, 2H).

**General procedure for the synthesis of 3a-f**

To a solution of porphyrin **2** (0.3 mmol) in dichloromethane/methanol (200 mL, v/v = 9/1) was gradually added *N*-bromosuccinimide (112 mg, 0.63 mmol), the reaction mixture was stirred at room temperature for 4 h. The solvent was evaporated under reduced pressure and the resulting residue was recrystallized with dichloromethane/methanol to afford purple solid **3a-f**.

5,15-Di((4-methoxycarbonylmethyl)phenyl)-10,20-dibromoporphyrin (**3a**)

The above described general procedure was followed to afford the purple solid **3a** (192 mg, 84%). 1H NMR (400 MHz, CDCl3): δ ppm 9.53 (d, *J* = 4.8 Hz, 4H), 8.77 (d, *J* = 4.3 Hz, 4H), 8.04 (d, *J* = 7.9 Hz, 4H), 7.62 (d, *J* = 7.9 Hz, 4H), 3.93 (s, 4H), 3.83 (s, 6H), -2.82 (s, 2H).

5,15-Di((3-methoxycarbonylmethyl)phenyl)-10,20-dibromoporphyrin (**3b**)

The above described general procedure was followed to afford the purple solid **3b** (195 mg, 85%). 1H NMR (400 MHz, CDCl3): δ ppm 9.62 (d, *J* = 4.8 Hz, 4H), 8.86 (d, *J* = 4.3 Hz, 4H), 8.08 (d, *J* = 7.7 Hz, 4H), 7.73 (d, *J* = 4.3 Hz, 4H), 3.95 (s, 4H), 3.83 (s, 6H), -2.74 (s, 2H).

5,15-Di((3-ethoxycarbonylmethoxy)phenyl)-10,20-dibromoporphyrin (**3c**)

The above described general procedure was followed to afford the purple solid **3c** (234 mg, 95%). 1H NMR (400 MHz, CDCl3): δ ppm 9.62 (s, 4H), 8.89 (s, 4H), 8.11 - 8.04 (m, 2H), 7.82 (d, *J* = 7.5 Hz, 1H), 7.72 (dd, *J* = 16.1, 8.0 Hz, 2H), 7.41 (d, *J* = 7.9 Hz, 1H), 7.34 (d, *J* = 8.1 Hz, 2H), 4.96 (s, 2H), 4.86 (s, 2H), 4.47 (d, *J* = 7.1 Hz, 2H), 4.36 - 4.31 (m, 2H), 1.47 (s, 3H), 1.30 (d, *J* = 7.1 Hz, 3H), -2.76 (s, 2H).

5,15-Di((3-ethoxycarbonylpropoxy)phenyl)-10,20-dibromoporphyrin (**3d**)

The above described general procedure was followed to afford the purple solid **3d** (240 mg, 91%). 1H NMR (400 MHz, CDCl3): δ ppm 9.63 (d, *J* = 4.0 Hz, 4H), 8.92 (s, 4H), 7.79 - 7.72 (m, 4H), 7.68 (t, *J* = 7.8 Hz, 2H), 7.37 (d, *J* = 7.8 Hz, 2H), 4.25 (t, *J* = 6.0 Hz, 4H), 4.20 - 4.15 (m, 4H), 2.64 (t, *J* = 7.2 Hz, 4H), 2.29 - 2.23 (m, 4H), 1.28 (t, *J* = 7.1 Hz, 6H), -2.74 (s, 2H).

5,15-Di((3-methoxycarbonylmethyl)phenyl)-10,20-dichloroporphyrin (**3e**)

To a solution of 5,15-di((3-methoxycarbonylmethyl)phenyl) porphyrin **2b** (0.145 mmol) in dichloromethane/methanol (200 mL, v/v = 9/1) was gradually added *N*-chlorosuccinimide (112 mg, 0.63 mmol), the reaction mixture was stirred at room temperature for 12 h. The solvent was evaporated under reduced pressure and the crude product was purified by column chromatography eluted with dichloromethane /petroleum ether (v/v = 1:2) to afford the purple solid **3e** (146 mg, 75%). 1H NMR (400 MHz, CDCl3): δ ppm 9.59 (d, J = 4.8 Hz, 4H), 8.87 (d, J = 4.7 Hz, 4H), 8.09 (s, 2H), 7.96 - 7.94 (m, 3H), 7.73 (s, 3H), 3.95 (s, 4H), 3.83 (s, 6H), -2.70 (s, 2H).

5,15-Di((3-methoxycarbonylmethyl)phenyl)-10,20-diiodoporphyrin (**3f**)

5,15-di((3-methoxycarbonylmethyl)phenyl) porphyrin (0.145 mmol) were dissolved in CHCl3 (150 mL). Iodine (0.311 mmol), 20 drops of pyridine and bis(trifluoroacetoxy) iodobenzene (0.341 mmol) were successively added under vigorous stirring. The reaction solution was stirred for 48 h in the dark. Then the solution was washed with an aqueous solution of Na2S2O3 and the organic phase was evaporated in vacuo. The crude product was purified by column chromatography eluted with dichloromethane /petroleum ether (v/v = 1:2) to afford the purple solid **3f** (162 mg, 73%).1H NMR (400 MHz, CDCl3): δ ppm 9.60 (d, J = 4.8 Hz, 4H), 8.80 (d, J = 4.8 Hz, 4H), 8.07 (s, 2H), 7.95 (d, J = 1.3 Hz, 3H), 7.71 (s, 3H), 3.94 (s, 4H), 3.82 (s, 6H), -2.66 (s, 2H).

**General procedure for the synthesis of PS1 and I1-6**

Porphyrin **2b** (0.5 mmol) or porphyrin **3** (0.5 mmol) was dissolved in tetrahydrofuran (100 mL) followed by 2 mol/L KOH (25 mL) solution. The reaction mixture was stirred at room temperature for 4 h. The solvent was removed under reduced pressure and the resulting suspension was diluted with water (30 mL). The precipitate formed by acidification with 2 mol/L hydrochloric acid was filtered, washed with water and dried in vacuum.

5,15-Di((3-carboxymethyl)phenyl) porphyrin (**PS1**)

Using **2b** as raw material, **PS1** was prepared by following the above general procedure (274 mg, 95%). 1H NMR (400 MHz, DMSO-*d6*): δ ppm 10.57 (s, 2H), 9.59 (d, J = 4.1 Hz, 4H), 9.09 (d, J = 3.4 Hz, 4H), 7.96-7.67 (m, 6H), 7.44 (d, J = 7.9 Hz, 2H), 4.02 (s, 4H), -3.27 (s, 2H). 13C NMR (101 MHz, DMSO-*d6*): δ ppm 171.31, 157.40, 146.80, 145.21, 142.04, 133.02, 131.26, 128.59, 128.33, 121.52, 118.85, 114.92, 106.20, 65.99. HRMS (MALDI): m/z calcd for C36H26N4O4 [M+H]+, 578.20; found, 579.0331.

5,15-Di((4-carboxymethyl)phenyl)-10,20-dibromoporphyrin (**I1**)

**I1** was prepared by following the above general procedure (332 mg, 90%). 1H NMR (400 MHz, Pyr-*d5*): δ ppm 9.75 (d, *J* = 4.8 Hz, 4H), 8.94 (d, *J* = 4.8 Hz, 4H), 8.25 (d, *J* = 7.9 Hz, 4H), 8.01 (d, *J* = 7.9 Hz, 4H), 4.33 (s, 4H), -2.58 (s, 2H). 13C NMR (101 MHz, Pyr-*d5*): δ ppm 174.72, 150.62, 150.35, 150.08, 149.79, 136.27, 136.02, 135.77, 129.18, 124.25, 124.00, 123.75, 104.61, 42.70, 30.46. HRMS (MALDI): m/z calcd for C36H24Br2N4O4 [M+H]+,736.42 ; found, 737.0211.

5,15-Di((3-carboxymethyl)phenyl)-10,20-dibromoporphyrin (**I2**)

**I2** was prepared by following the above general procedure (361 mg, 98%). 1H NMR (400 MHz, DMSO-*d6*): δ ppm 12.57 (s, 2H), 9.67 (s, 4H), 8.88 (s, 4H), 8.12 (s, 4H), 7.80 (d, *J* = 6.1 Hz, 4H), 3.95 (s, 4H), -2.97 (s, 2H). 13C NMR (101 MHz, DMSO-*d6*): δ ppm 172.87, 140.13, 135.70, 133.99, 132.89, 129.35, 126.98, 121.29, 103.08, 40.55. HRMS (MALDI): m/z calcd for C36H24Br2N4O4 [M+H]+, 736.42; found, 737.0262.

5,15-Di((3-carboxymethoxy)phenyl)-10,20-dibromoporphyrin (**I3**)

**I3** was prepared by following the above general procedure (351 mg, 91%). 1H NMR (400 MHz, DMSO-*d6*): δ ppm 13.20 (s, 2H), 9.63 (d, J = 4.2 Hz, 4H), 8.85 (s, 4H), 8.09 (d, J = 8.5 Hz, 4H), 7.39 (d, J = 8.6 Hz, 4H), 5.01 (s, 4H), -2.98 (s, 2H). 13C NMR (101 MHz, DMSO-*d6*): δ ppm 198.46, 170.72, 158.51, 136.02, 133.55, 121.66, 113.72, 103.50, 79.76, 79.43, 79.10, 65.44, 60.20. HRMS (MALDI): m/z calcd for C36H24Br2N4O6 [M+H]+, 768.42; found, 769.0080.

5,15-Di((3-carboxypropoxy)phenyl)-10,20-dibromoporphyrin (**I4**)

**I4** was prepared by following the above general procedure (389 mg, 94%). 1H NMR (400 MHz, Pyr-*d5*): δ ppm 9.73 (d, *J* = 4.8 Hz, 4H), 9.00 (d, *J* = 4.8 Hz, 4H), 7.93 (s, 2H), 7.86 (d, *J* = 7.4 Hz, 2H), 7.72 (t, *J* = 7.9 Hz, 2H), 7.51 (dd, *J* = 8.2, 2.2 Hz, 2H), 4.27 (t, *J* = 6.3 Hz, 4H), 4.10 (d, *J* = 7.1 Hz, 4H), 2.66 (t, *J* = 7.2 Hz, 4H), -2.59 (s, 2H). 13C NMR (101 MHz, Pyr-*d5*): δ ppm 172.82, 157.76, 142.71, 128.09, 127.74, 123.74, 122.71, 121.66, 121.45, 114.81, 103.89, 67.38, 60.20, 30.80, 24.98, 14.05. HRMS (MALDI): m/z calcd for C40H32Br2N4O6 [M+H]+, 824.53; found, 825.0783.

5,15-Di((3-carboxymethyl)phenyl)-10,20-dichloroporphyrin (**I5**)

**I5** was prepared by following the above general procedure (292 mg, 90%). 1H NMR (600 MHz, DMSO-*d6*): δ ppm 12.62 (s, 2H), 9.50 (s, 4H), 8.77 (s, 4H), 8.07 (d, J = 5.1 Hz, 2H), 7.94 (s, 2H), 7.77 (d, J = 4.1 Hz, 4H), 3.94 (s, 4H), -3.37 (d, J = 7.4 Hz, 2H). 13C NMR (151 MHz, DMSO-*d6*): δ ppm 173.49, 140.37, 136.21, 134.65, 133.39, 129.77, 127.47, 121.46, 112.10, 41.22, 30.88. HRMS (MALDI): m/z calcd for C36H24Cl2N4O4 [M+H]+, 646.12; found, 647.1264.

5,15-Di((3-carboxymethyl)phenyl)-10,20-diiodoporphyrin (**I6**)

**I6** was prepared by following the above general procedure (380 mg, 91%). 1H NMR (600 MHz, DMSO-*d6*): δ ppm 12.58 (s, 2H), 9.62 (s, 4H), 8.78 (s, 4H), 8.09 (d, J = 3.6 Hz, 2H), 8.02 (s, 2H), 7.77 (d, J = 3.6 Hz, 4H), 3.94 (s, 4H), -2.89 (d, J = 10.6 Hz, 2H). 13C NMR (151 MHz, DMSO-*d6*): δ ppm 173.38, 140.95, 136.13, 134.39, 133.27, 129.76, 127.33, 121.68, 81.74, 41.13. HRMS (MALDI): m/z calcd for C36H24I2N4O4 [M+H]+, 829.99; found, 830.9948.

**Scheme S2.** The synthetic route of 5,15-diaryl-10,20-dihalogenated porphyrins **II1-10**. Reagents and reaction conditions: (a) amino acid ester, TBTU, Et3N, DMF, 4 h; (b) LiOH, THF, 3 h.

**General procedure for the synthesis of 4a-j**

Porphyrin **I1** (or **I2)** (0.2 mmol) and amino acid ester (0.6 mmol) were dissolved in *N*,*N*-dimethylformamide (10 mL) followed by 2-(1H-Benzotriazol-1-yl)-1,1,3,3-tetramethyluronium tetrafluoroborate (TBTU) (160 mg, 0.5 mmol) and triethylamine (0.2 mL), and the mixture was stirred at room temperature for 4 h under nitrogen. The reaction mixture was diluted with dichloromethane (30 mL). The organic phase was washed with water (30 mL), dried over anhydrous Na2SO4, filtered and evaporated in vacuo. The crude product was purified on a silica gel column to give purple solid **4a-j**.

5,15-Di(4-(2-oxo-2-methoxycarbonylmethylamino)ethylphenyl)-10,20-dibromoporphyrin (**4a**)

The above described general procedure was followed to afford the crude mixture which was purified by silica gel chromatography eluted with dichloromethane/methanol (v/v = 30:1) to give the purple solid **4a** (128 mg, 73%). 1H NMR (400 MHz, CDCl3): δ ppm 9.61 (d, *J* = 4.7 Hz, 4H), 8.85 (d, *J* = 4.3 Hz, 4H), 8.16 (d, *J* = 7.8 Hz, 4H), 7.72 (d, *J* = 7.8 Hz, 4H), 6.33 (s, 2H), 4.24 (d, *J* = 5.1 Hz, 4H), 3.99 (s, 4H), 3.87 (s, 6H), -2.75 (s, 2H).

5,15-Di(4-(2-oxo-2-(2-oxo-4-methoxycarbonyl)butylamino)ethylphenyl)-10,20-dibromoporphyrin (**4b**)

The above described general procedure was followed to afford the crude mixture which was purified by silica gel chromatography eluted with dichloromethane/methanol (v/v = 40:1) to give the purple solid **4b** (139 mg, 70%). 1H NMR (400 MHz, CDCl3): δ ppm 9.62 (d, *J* = 4.5 Hz, 4H), 8.86 (s, 4H), 8.16 (d, *J* = 7.6 Hz, 4H), 7.70 (d, *J* = 7.5 Hz, 14H), 6.59 (s, 2H), 4.40 (d, *J* = 4.3 Hz, 4H), 3.98 (s, 4H), 3.75 (s, 4H), 3.68 (s, 4H), 2.80 (s, 6H), -2.75 (s, 2H).

5,15-Di(3-(2-oxo-2-methoxycarbonylmethylamino)ethylphenyl)-10,20-dibromoporphyrin (**4c**)

The above described general procedure was followed to afford the crude mixture which was purified by silica gel chromatography eluted with dichloromethane/methanol (v/v = 30:1) to give the purple solid **4e** (131 mg, 75%). 1H NMR (400 MHz, CDCl3): δ ppm 9.61 (d, J = 4.7 Hz, 4H), 8.85 (s, 4H), 8.09 (s, 4H), 7.76 (s, 4H), 6.29 (s, 2H), 4.16 (d, J = 5.0 Hz, 4H), 3.92 (s, 4H), 3.79 (s, 6H), -2.76 (s, 2H).

5,15-Di(3-(2-oxo-2-(2-oxo-4-methoxycarbonyl)butylamino)ethylphenyl)-10,20-dibromoporphyrin (**4d**)

The above described general procedure was followed to afford the crude mixture which was purified by silica gel chromatography eluted with dichloromethane/methanol (v/v = 40:1) to give the purple solid **4d** (134 mg, 68%). 1H NMR (400 MHz, CDCl3): δ ppm 9.58 (d, J = 4.8 Hz, 4H), 8.84 (d, J = 4.4 Hz, 4H), 8.07 (d, J = 6.3 Hz, 4H), 7.74 (s, 4H), 6.59 (s, 2H), 4.31 (d, J = 4.5 Hz, 4H), 3.90 (s, 4H), 3.68 (s, 6H), 2.78 (s, 4H), 2.70 (s, 4H), -2.82 (s, 2H).

**General procedure for the synthesis of II1-10**

To a solution of porphyrin **4a-d** (0.15 mmol) in tetrahydrofuran (50 mL) was added 1 mol/L LiOH (15 mL) solution. The reaction mixture was stirred at room temperature for 5 h. The solvent was removed under reduced pressure and the resulting suspension was diluted with water (30 mL). The precipitate formed by acidification with 1 mol/L hydrochloric acid (16 mL) was filtered, washed with water, collected and dried in vacuum as purple solid **II1-4**.

5,15-Di(4-(2-oxo-2-carboxymethylamino)ethylphenyl)-10,20-dibromoporphyrin (**II1**)

**II1** was prepared by following the above general procedure (122 mg, 96%). 1H NMR (400 MHz, DMSO-*d6*): δ ppm 9.66 (d, *J* = 4.3 Hz, 4H), 8.86 (s, 4H), 8.64 (t, *J* = 5.8 Hz, 2H), 8.13 (d, *J* = 7.9 Hz, 4H), 7.76 (d, *J* = 7.9 Hz, 4H), 3.95 (d, *J* = 5.8 Hz, 4H), 3.90 (s, 4H), -2.93 (s, 2H). 13C NMR (101 MHz, DMSO-*d6*): δ ppm 171.44, 170.55, 134.30, 127.83, 41.89, 41.00, 31.12, 29.79, 28.93. HRMS (MALDI): m/z calcd for C40H30Br2N6O6 [M+H]+, 850.52; found, 851.0657.

5,15-Di(4-(2-oxo-2-(2-oxo-4-carboxy)butylamino)ethylphenyl)-10,20-dibromoporphyrin (**II2**)

**II2** was prepared by following the above general procedure (131 mg, 91%). 1H NMR (400 MHz, DMSO-*d6*): δ ppm 9.66 (s, 4H), 8.85 (s, 4H), 8.64 (t, *J* = 5.6 Hz, 2H), 8.13 (d, *J* = 7.9 Hz, 4H), 7.77 (d, *J* = 8.0 Hz, 4H), 4.16 (d, *J* = 5.5 Hz, 4H), 3.91 (s, 4H), 2.76 (t, *J* = 6.5 Hz, 4H), 2.50 (s, 4H), -2.95 (s, 2H). 13C NMR (151 MHz, DMSO-*d6*): δ ppm 174.37, 171.00, 138.88, 136.78, 134.79, 128.25, 121.61, 103.41, 49.20, 42.43, 34.72, 30.88, 29.70, 28.24. HRMS (MALDI): m/z calcd for C46H38Br2N6O8 [M+H]+, 962.65; found, 963.1233.

5,15-Di(3-(2-oxo-2-carboxymethylamino)ethylphenyl)-10,20-dibromoporphyrin (**II3**)

**II3** was prepared by following the above general procedure (116 mg, 91%). 1H NMR (400 MHz, DMSO-*d6*): δ ppm 9.52 (s, 4H), 8.81 (s, 4H), 8.55 (s, 2H), 8.14 (s, 2H), 7.94 (s, 2H), 7.79 (t, J = 9.4 Hz, 4H), 3.90 (d, J = 5.3 Hz, 4H), 3.87 (s, 4H), -3.26 (s, 2H). 13C NMR (151 MHz, DMSO-*d6*): δ ppm 171.89, 171.07, 140.59, 135.88, 135.51, 133.30, 129.47, 127.41, 121.72, 103.46, 42.45, 41.48, 30.88. HRMS (MALDI): m/z calcd for C40H30Br2N6O6 [M+H]+, 850.52; found, 849.0705.

5,15-Di(3-(2-oxo-2-(2-oxo-4-carboxy)butylamino)ethylphenyl)-10,20-dibromoporphyrin (**II4**)

**II4** was prepared by following the above general procedure (120 mg, 83%). 1H NMR (400 MHz, DMSO-*d6*): δ ppm 12.24 (s, 2H), 9.54 (s, 4H), 8.82 (s, 4H), 8.56 (s, 2H), 8.13 (d, J = 6.4 Hz, 2H), 7.96 (s, 2H), 7.81 (t, J = 9.3 Hz, 4H), 4.11 (d, J = 4.9 Hz, 4H), 3.88 (s, 4H), 2.72 (t, J = 6.1 Hz, 4H), 2.47 (t, J = 6.0 Hz, 4H), -3.20 (s, 2H). 13C NMR (151 MHz, DMSO-*d6*): δ ppm 205.98, 174.10, 140.60, 135.91, 135.49, 133.29, 129.44, 127.44, 121.70, 103.45, 49.12, 42.47, 34.55, 27.95. HRMS (MALDI): m/z calcd for C46H38Br2N6O8 [M+H]+, 962.65; found, 963.1179.

**NMR and MS Spectra**


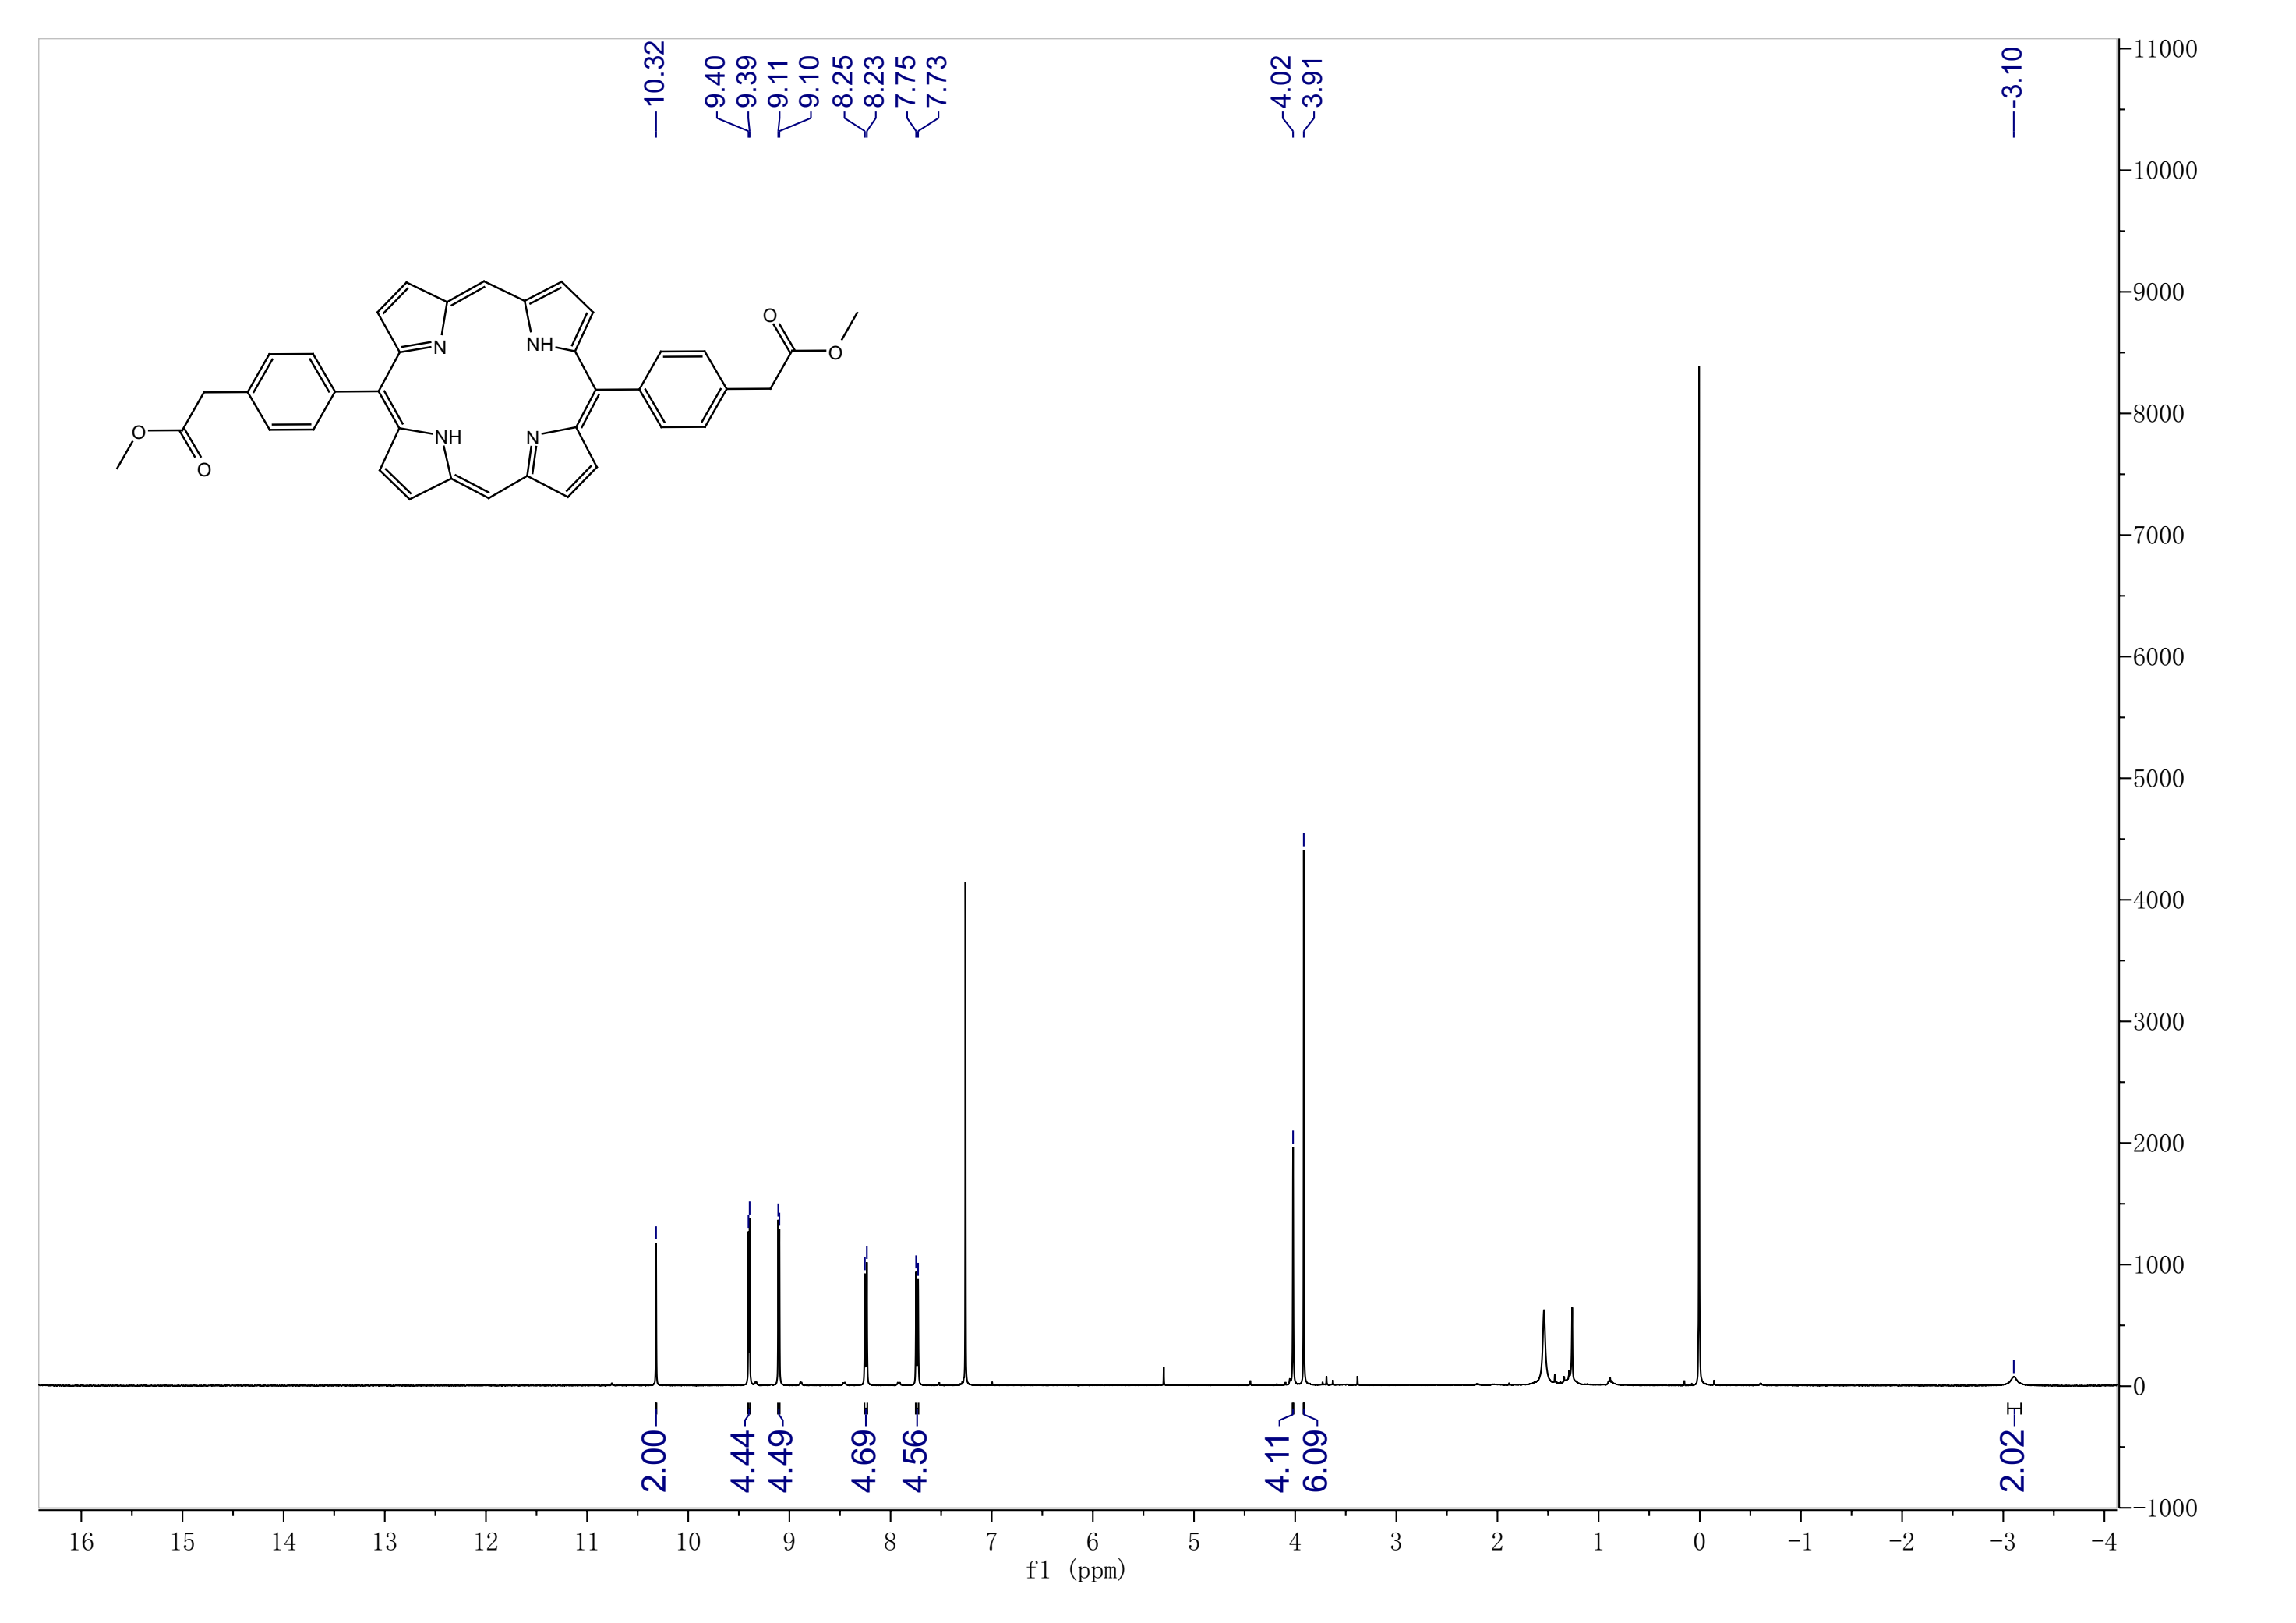


**Figure S1.** 1H NMR (CDCl3,400 MHz) of **2a**


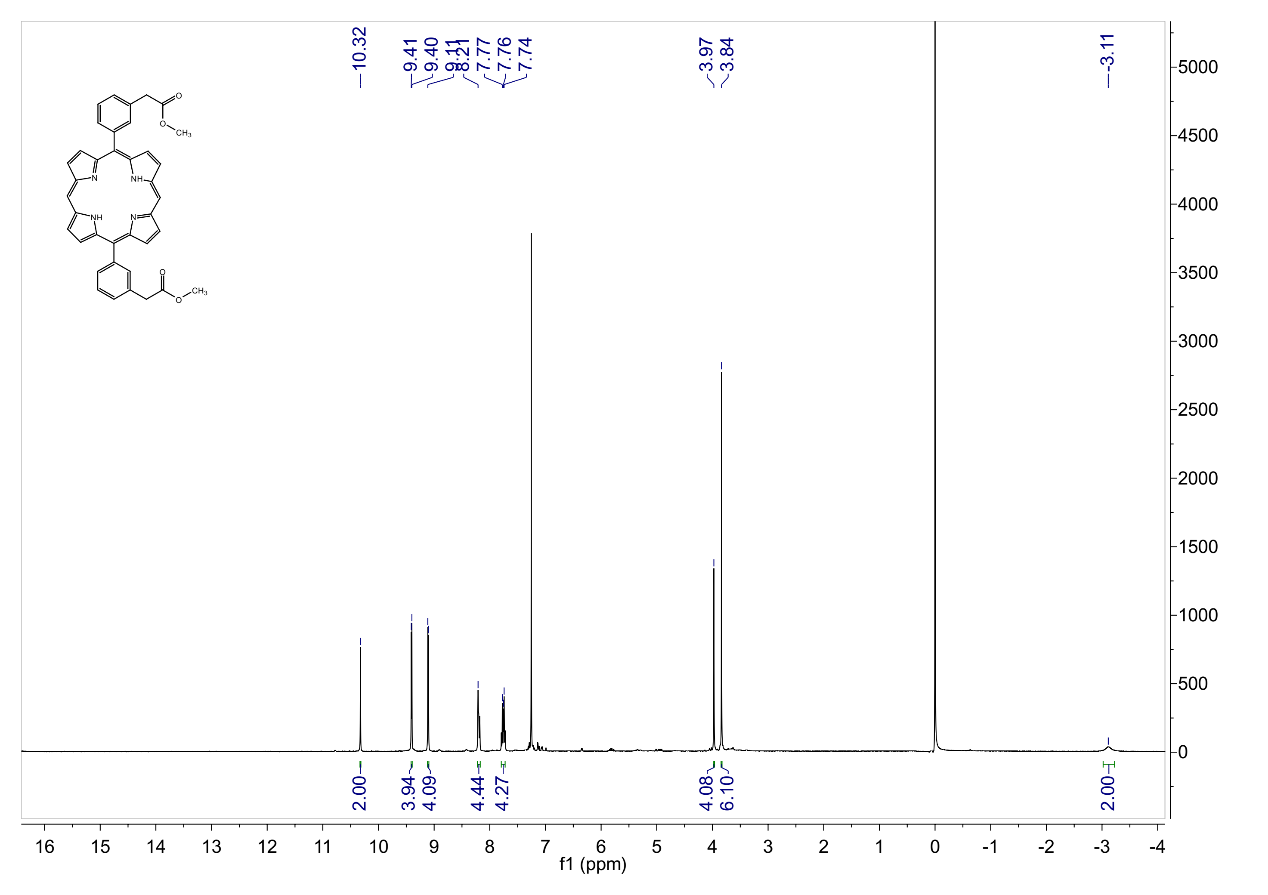


**Figure S2.** 1H NMR (CDCl3,400 MHz) of **2b**

**
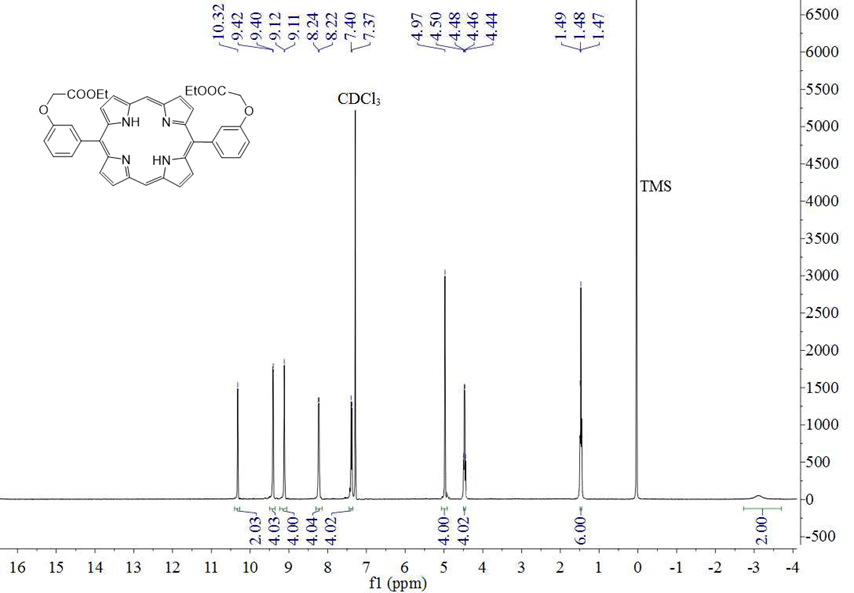
**

**Figure S3.** 1H NMR (CDCl3,400 MHz) of **2c**

**
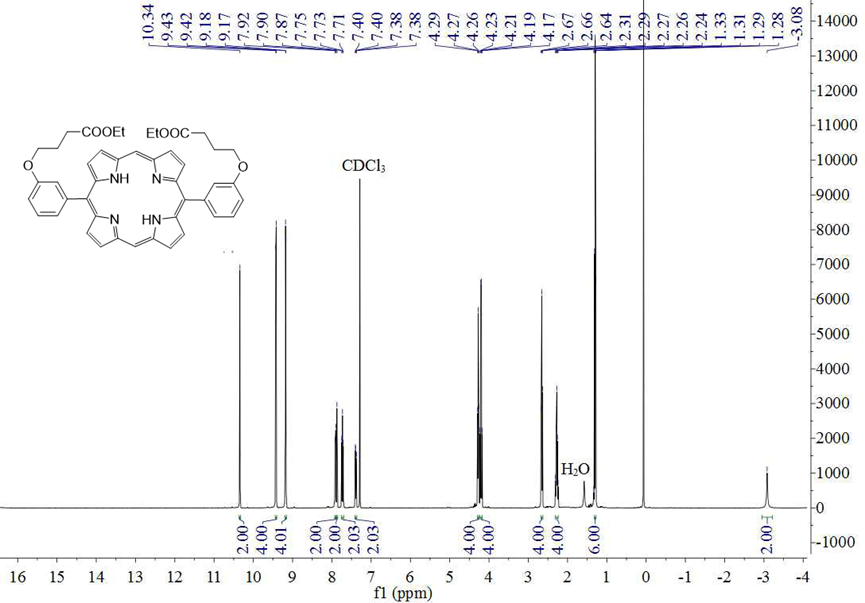
**

**Figure S4.** 1H NMR (CDCl3,400 MHz) of **2d**


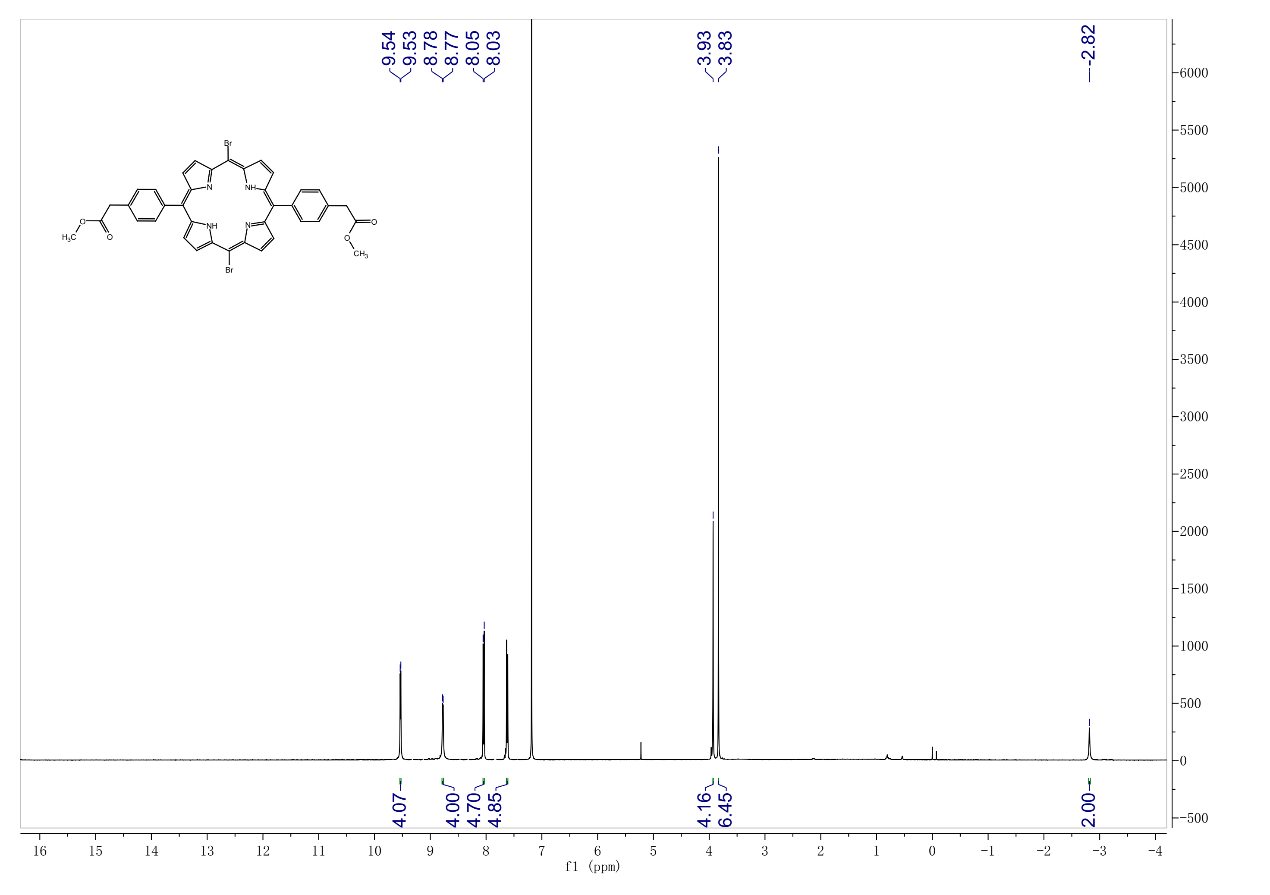


**Figure S5.** 1H NMR (CDCl3,400 MHz) of **3a**


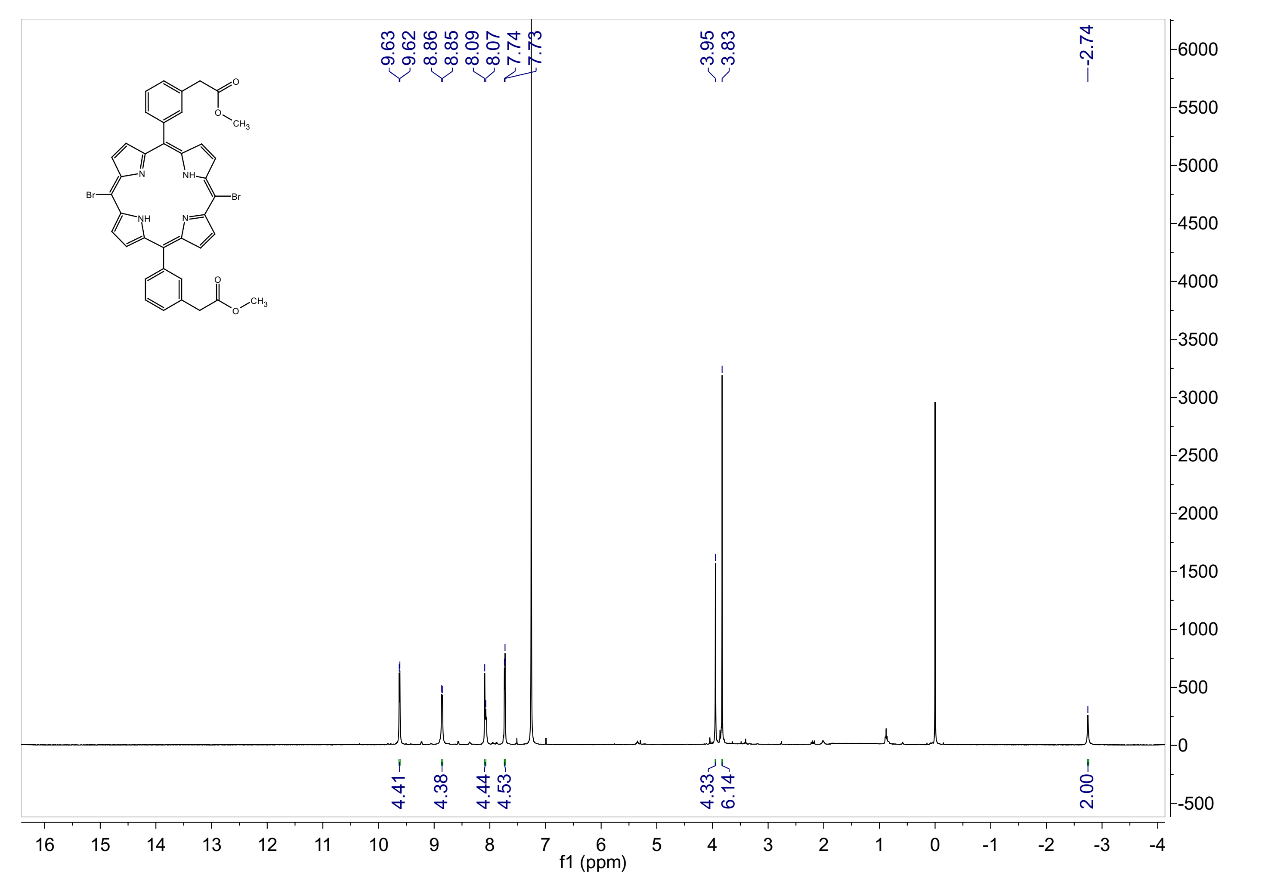


**Figure S6.** 1H NMR (CDCl3,400 MHz) of **3b**


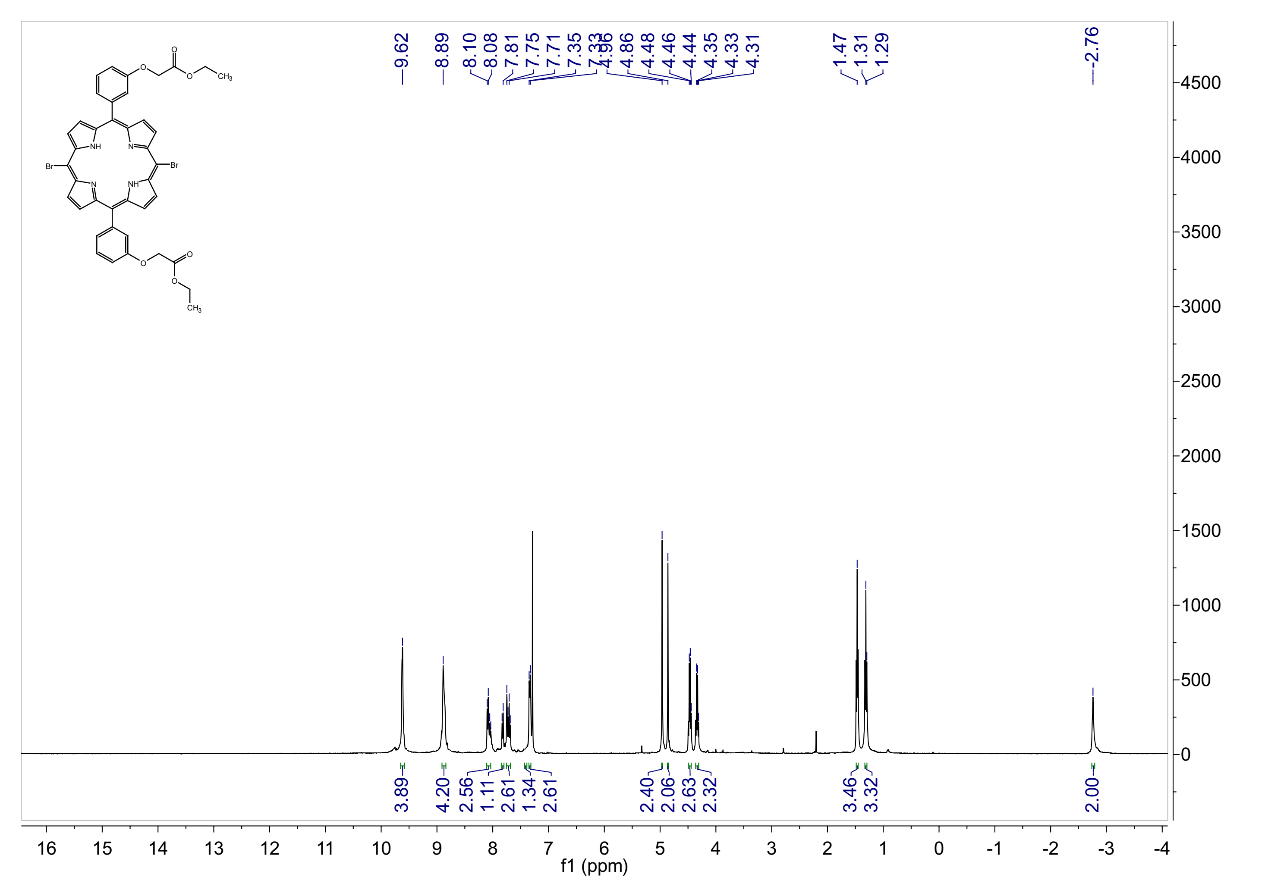


**Figure S7.** 1H NMR (CDCl3,400 MHz) of **3c**


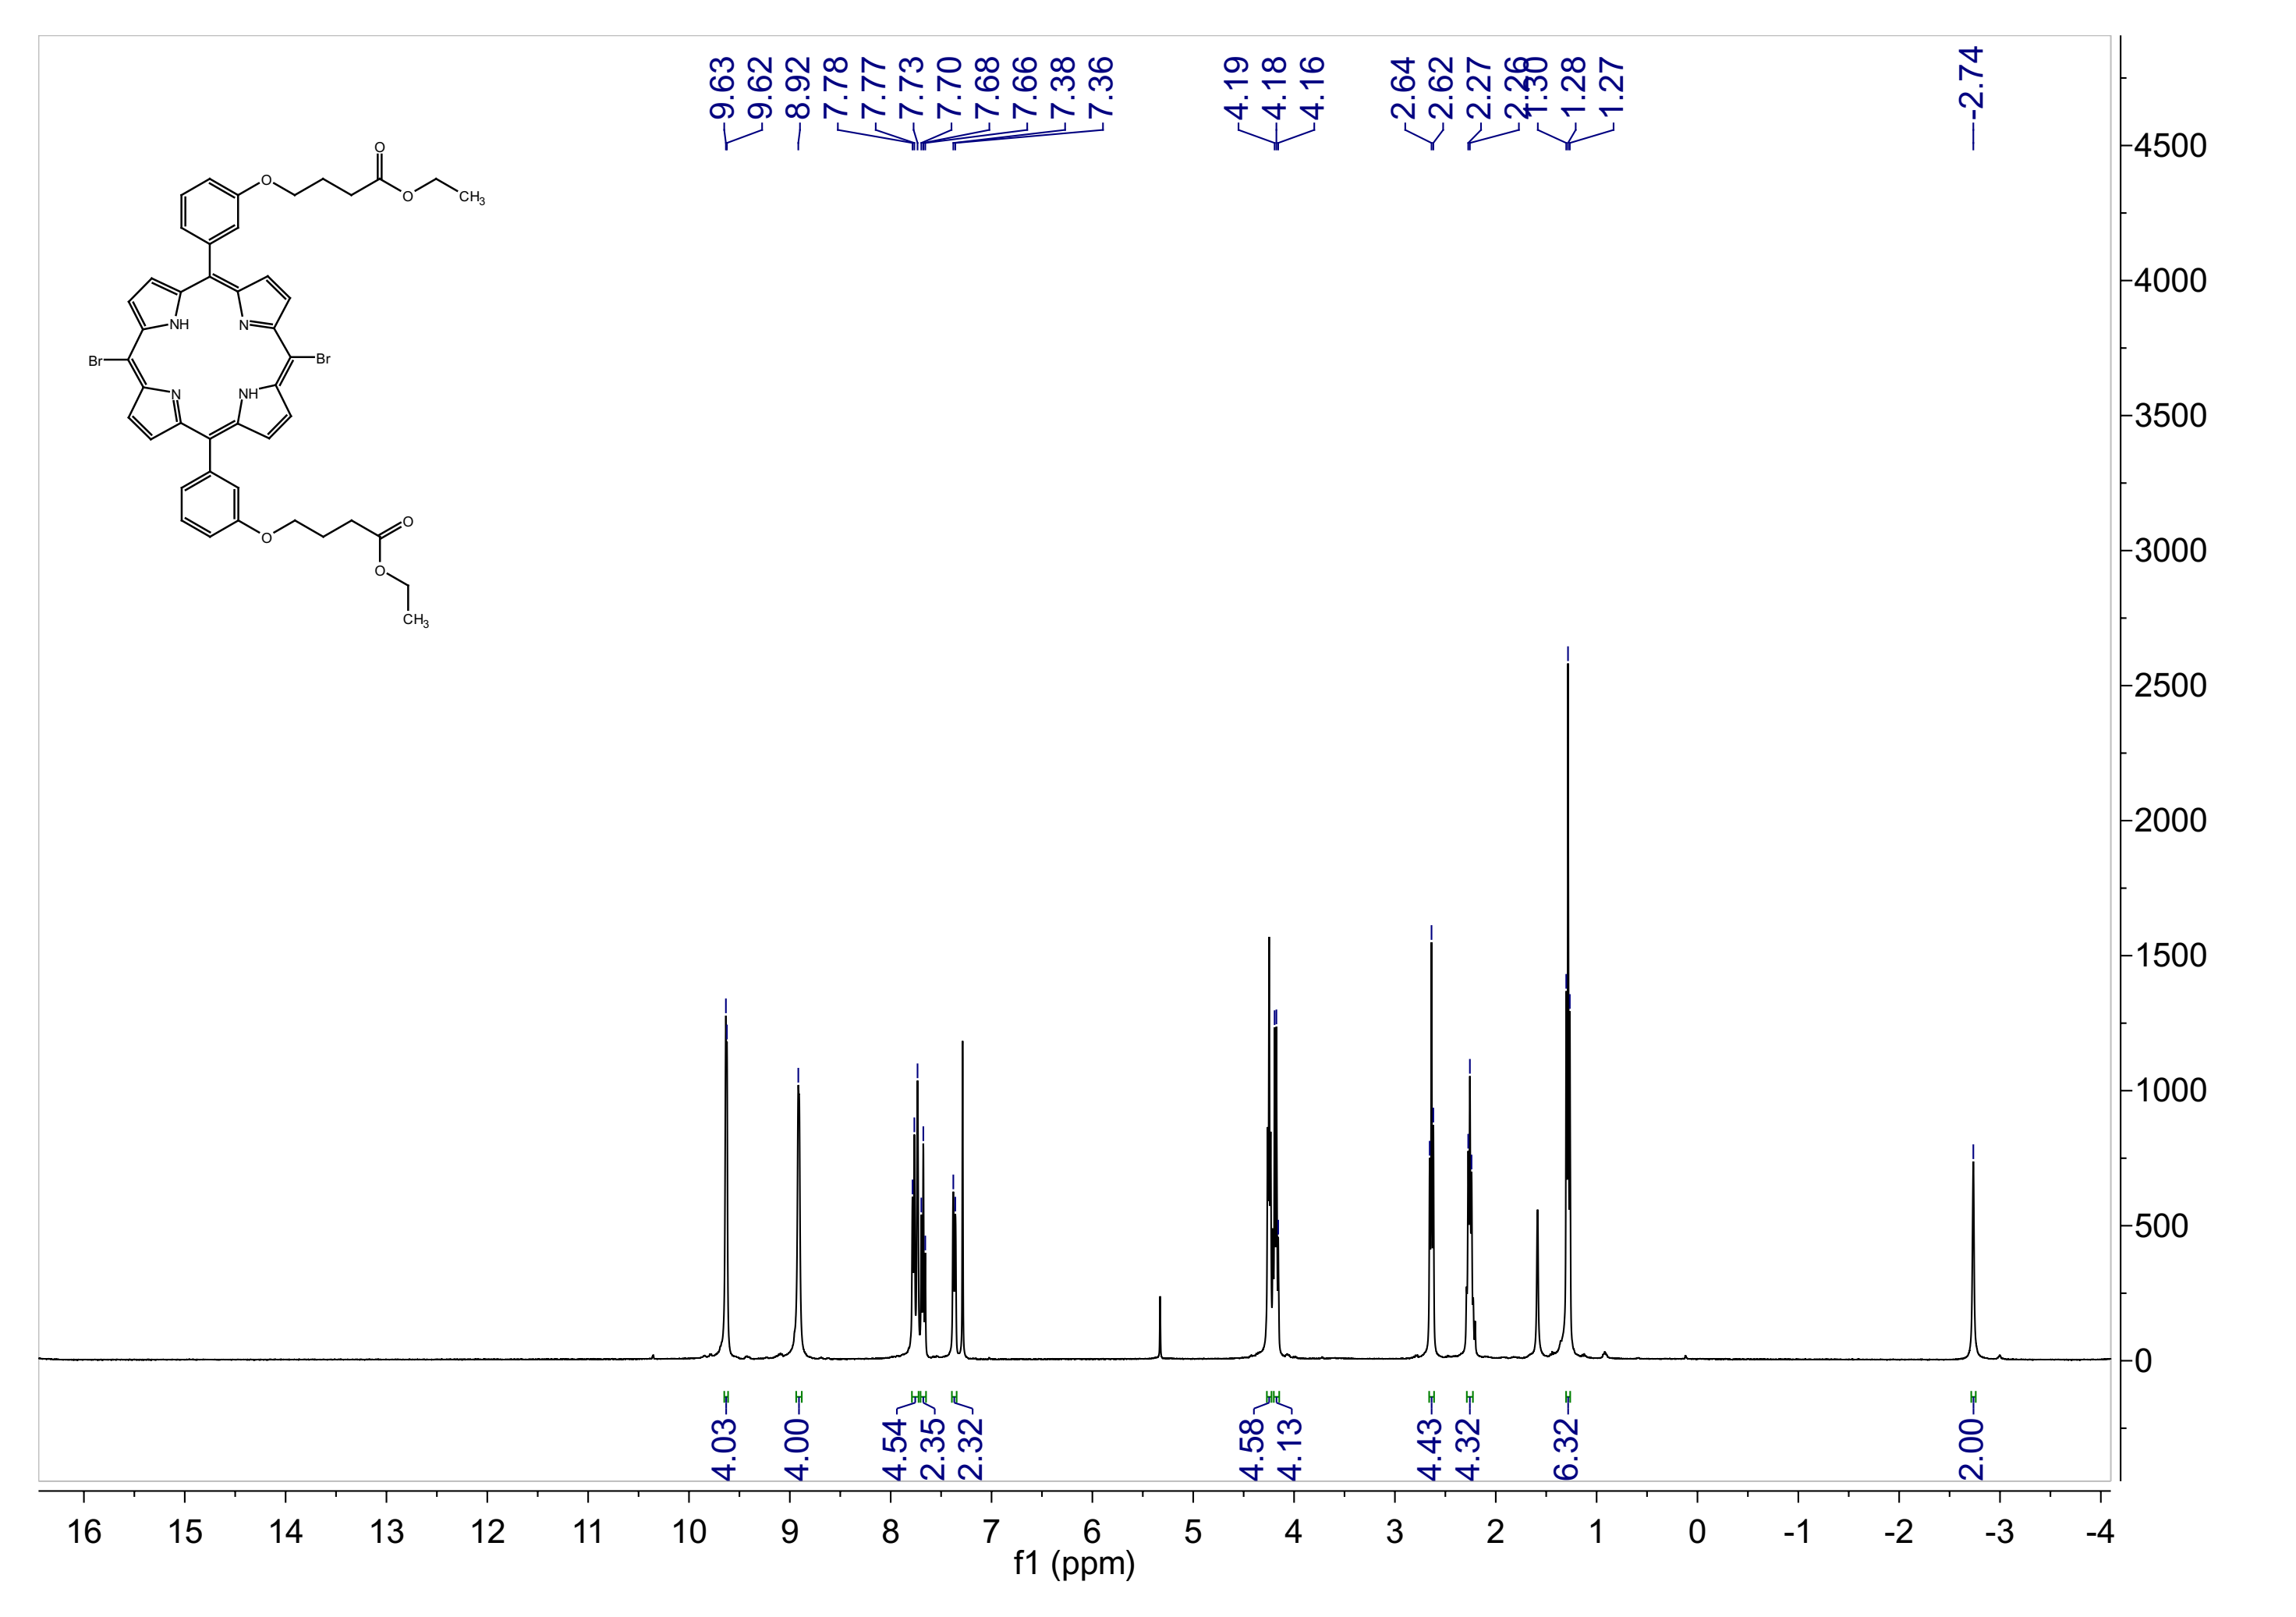


**Figure S8.** 1H NMR (CDCl3,400 MHz) of **3d**


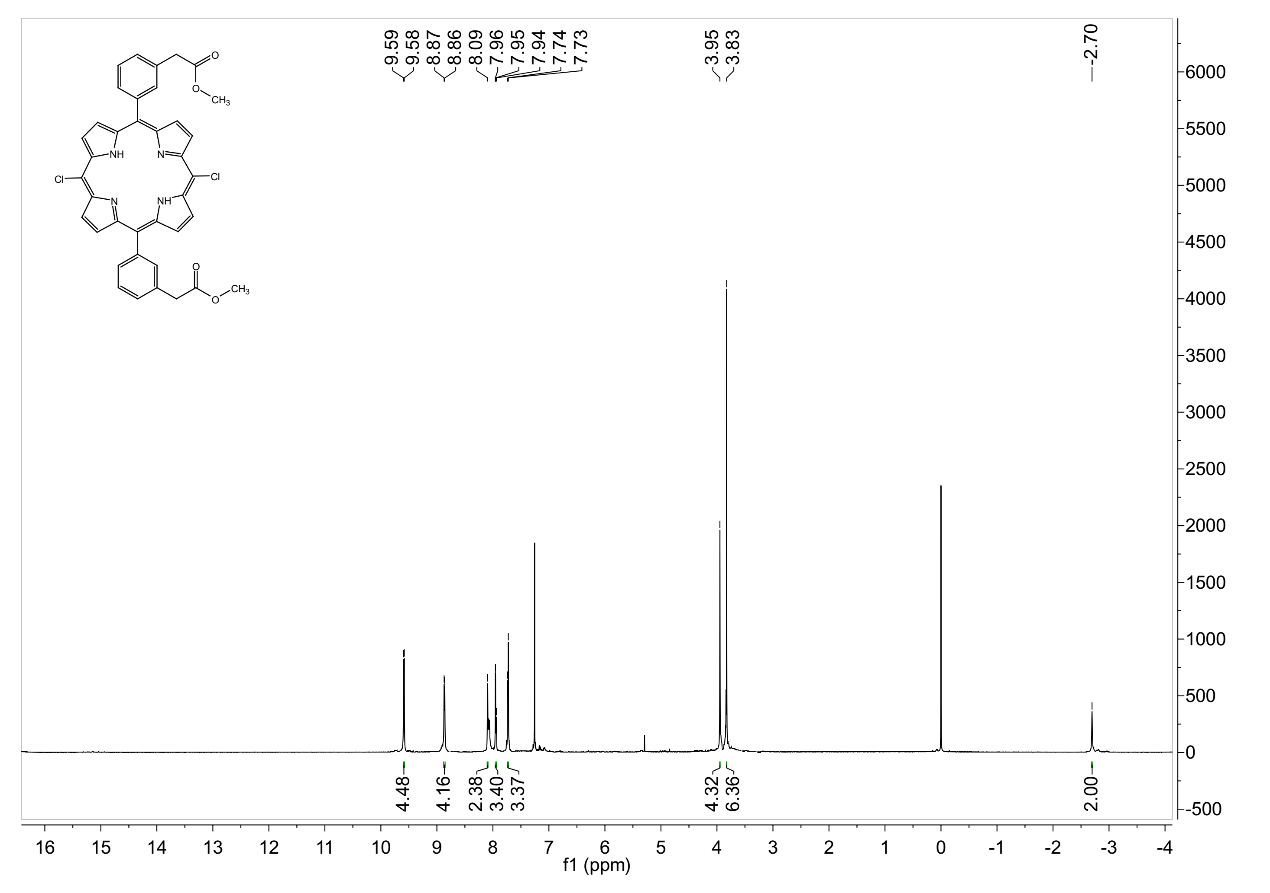


**Figure S9.** 1H NMR (CDCl3,400 MHz) of **3e**


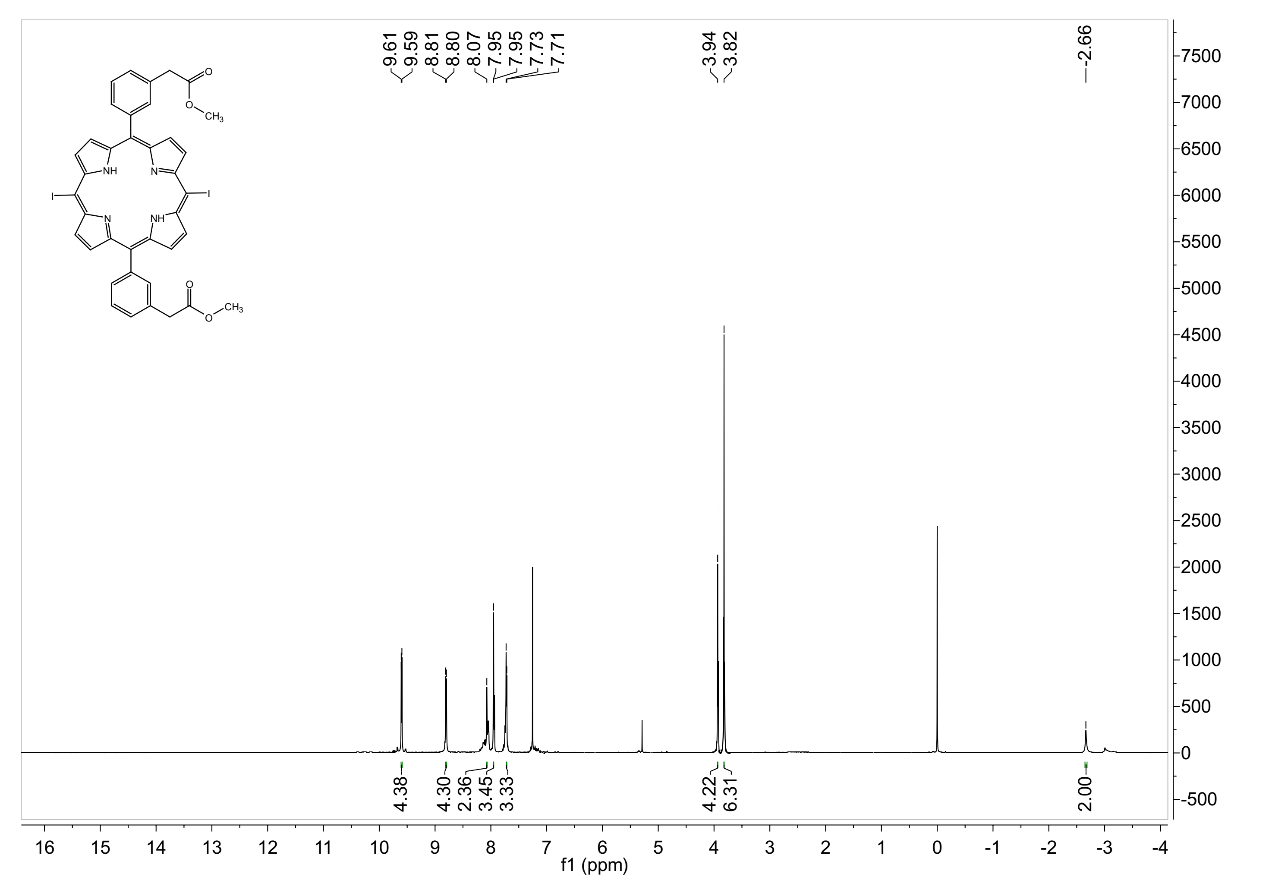


**Figure S10.** 1H NMR (CDCl3,400 MHz) of **3f**


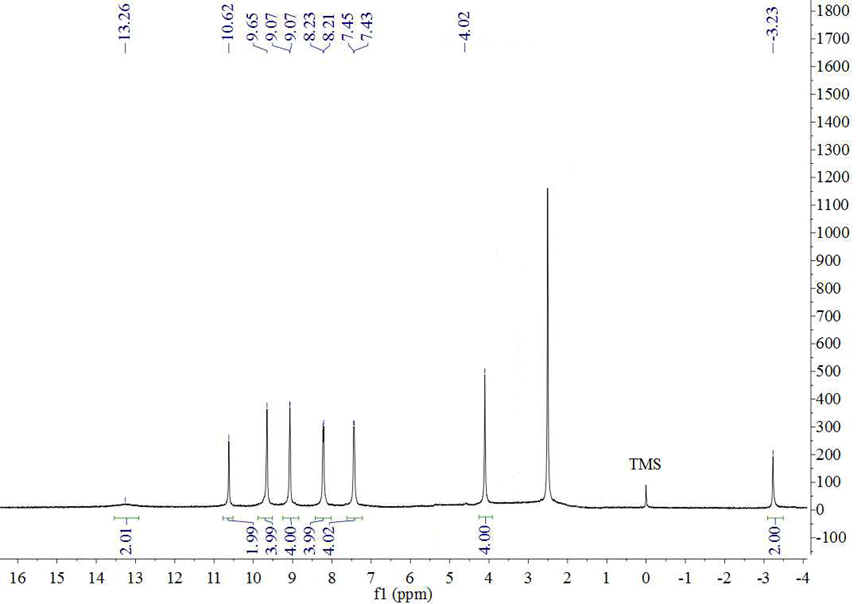


**Figure S11-1.** 1H NMR (DMSO-*d*6,400 MHz) of **PS1**

**
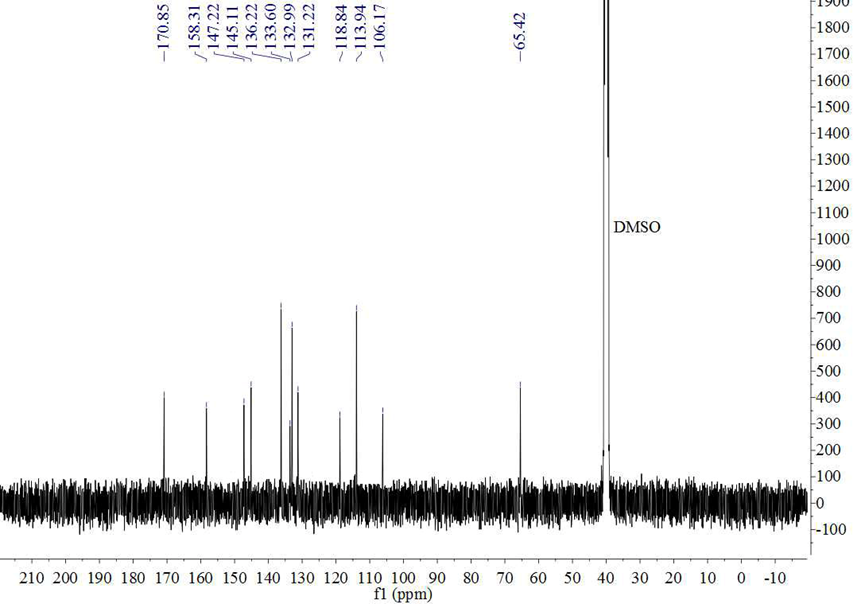
**

**Figure S11-2.** 13C NMR (DMSO-*d*6,101 MHz) of **PS1**


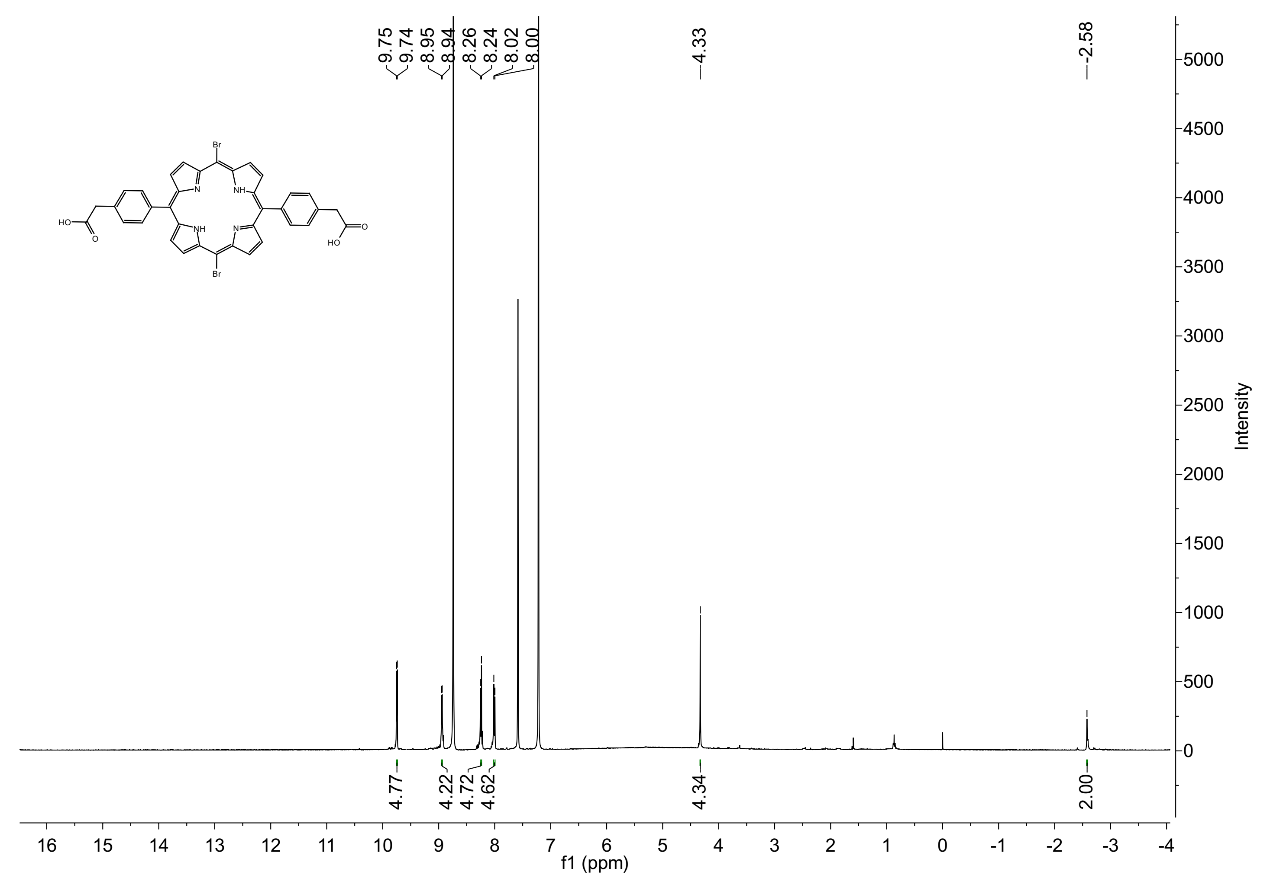


**Figure S12-1.** 1H NMR (Pyr-*d5*,400 MHz) of **I1**


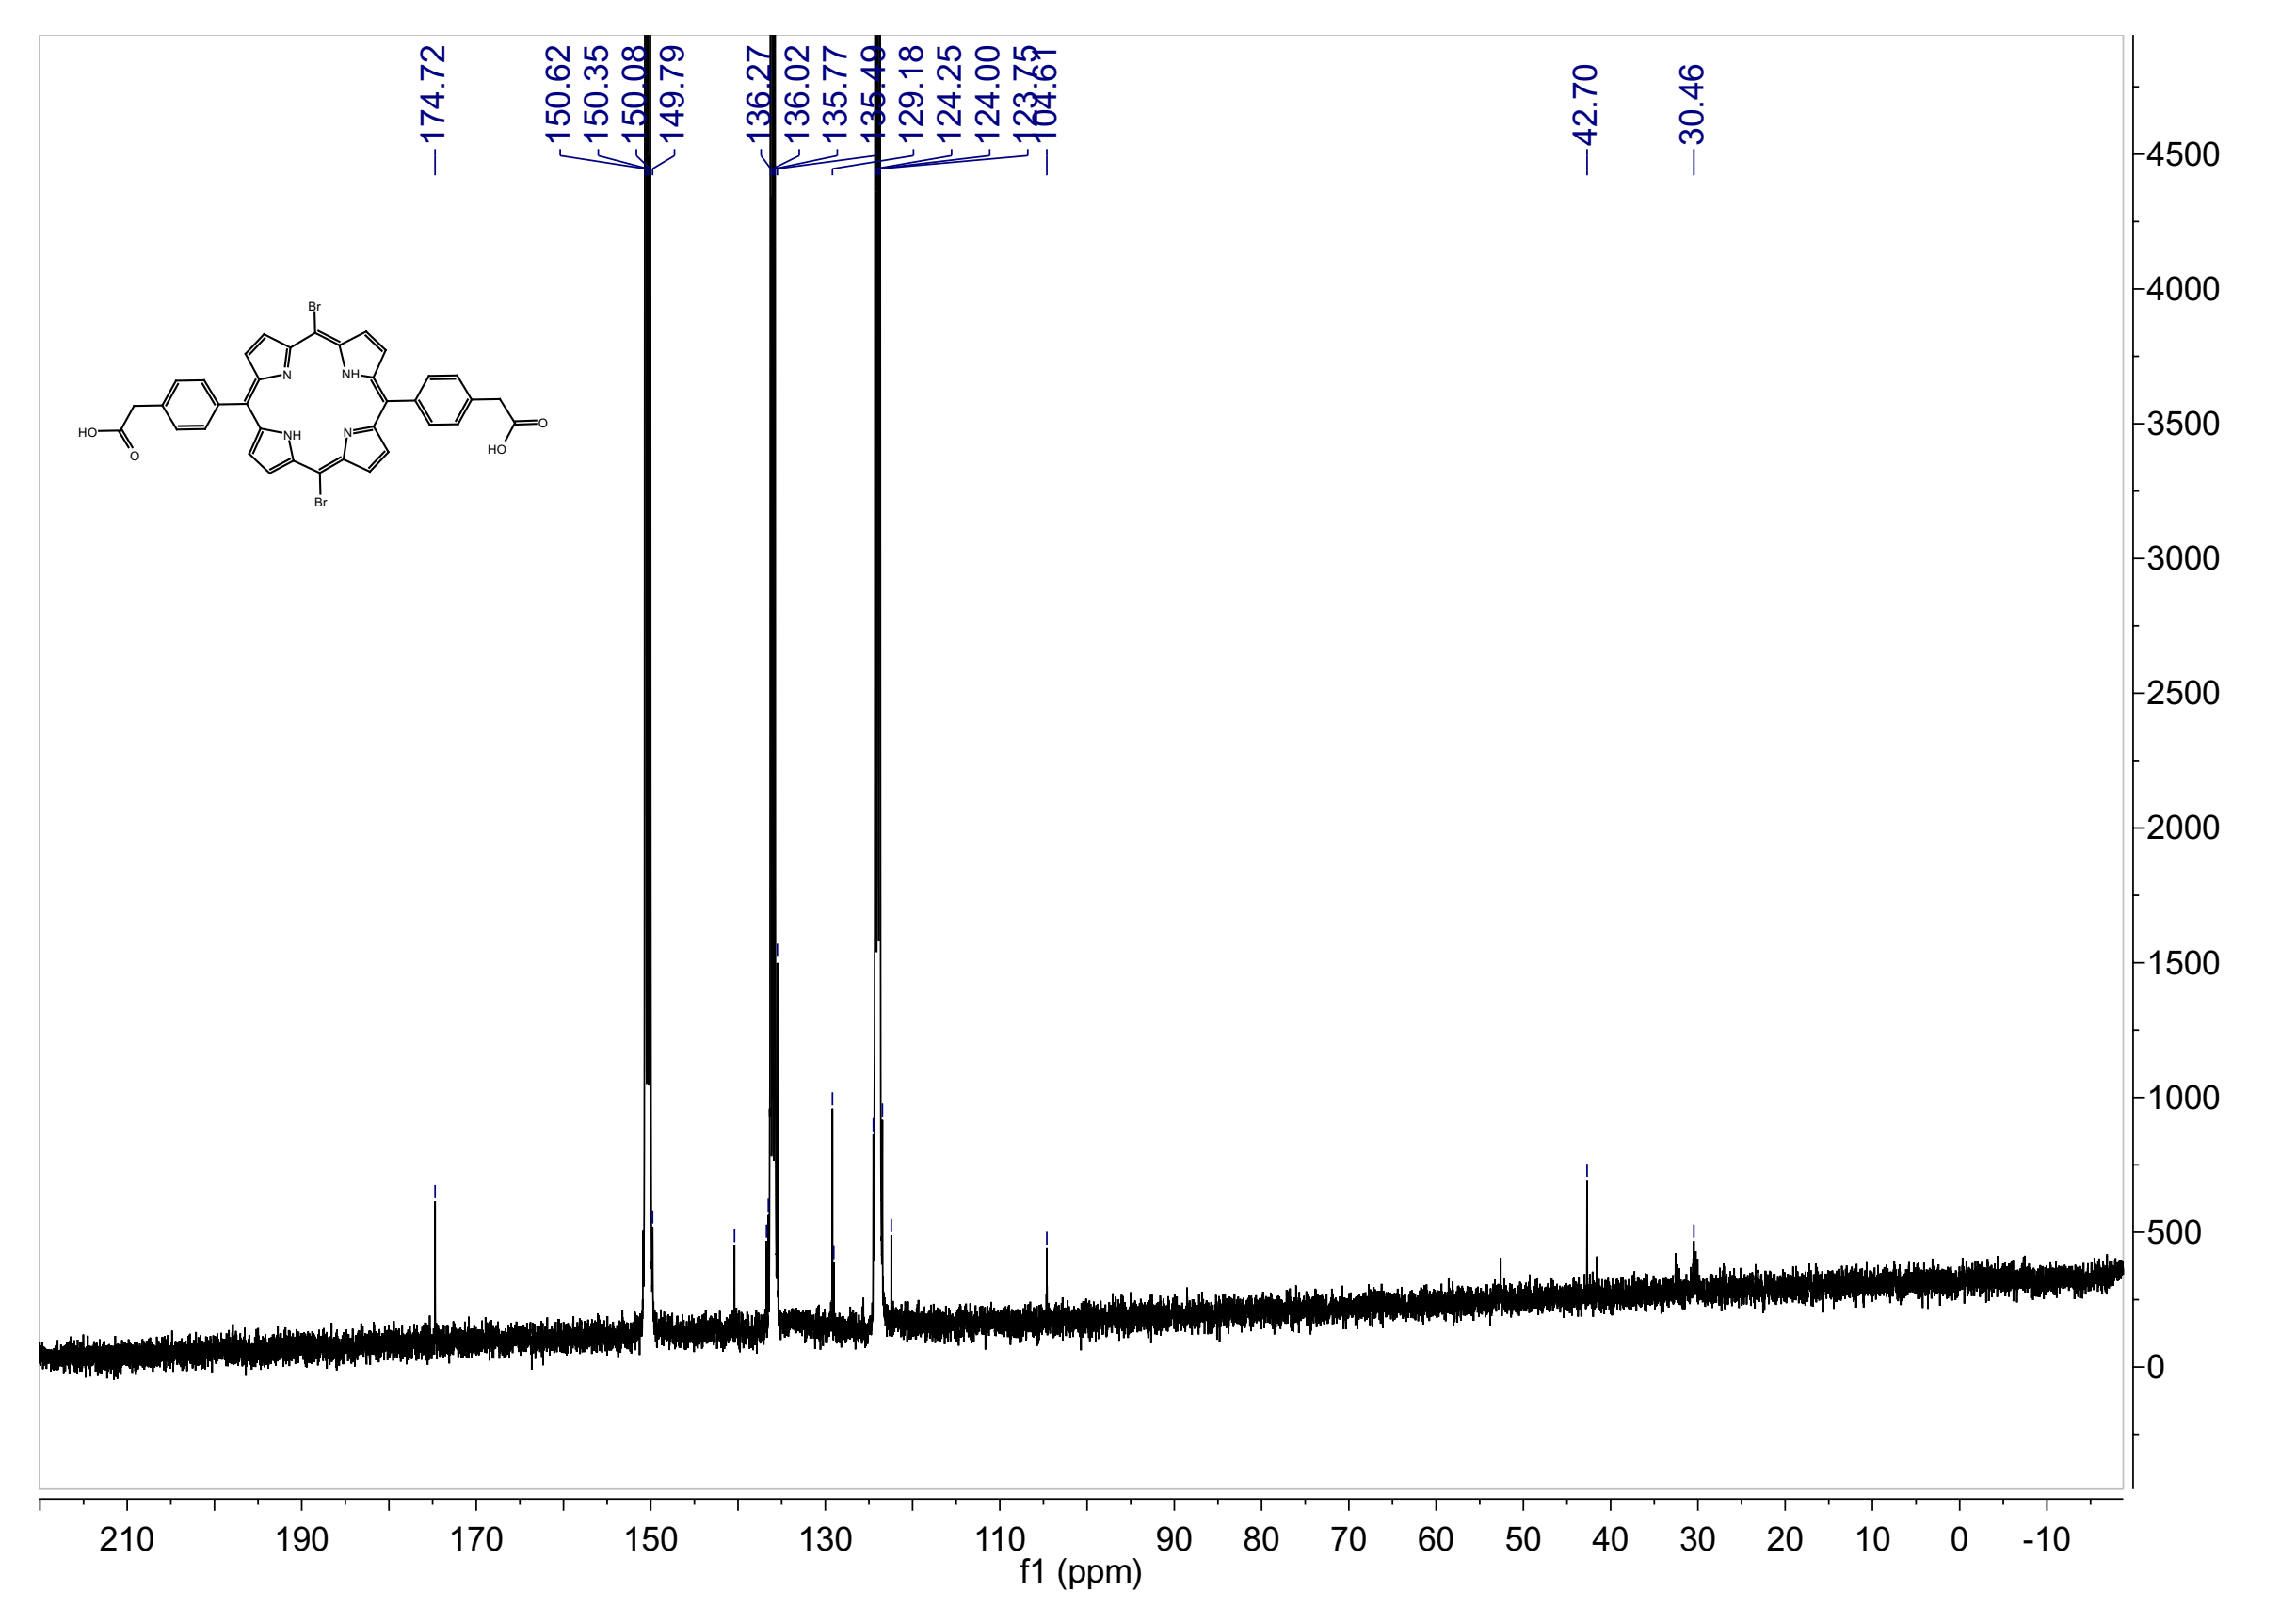


**Figure S12-2.** 13C NMR (Pyr-*d5*,101 MHz) of **I1**


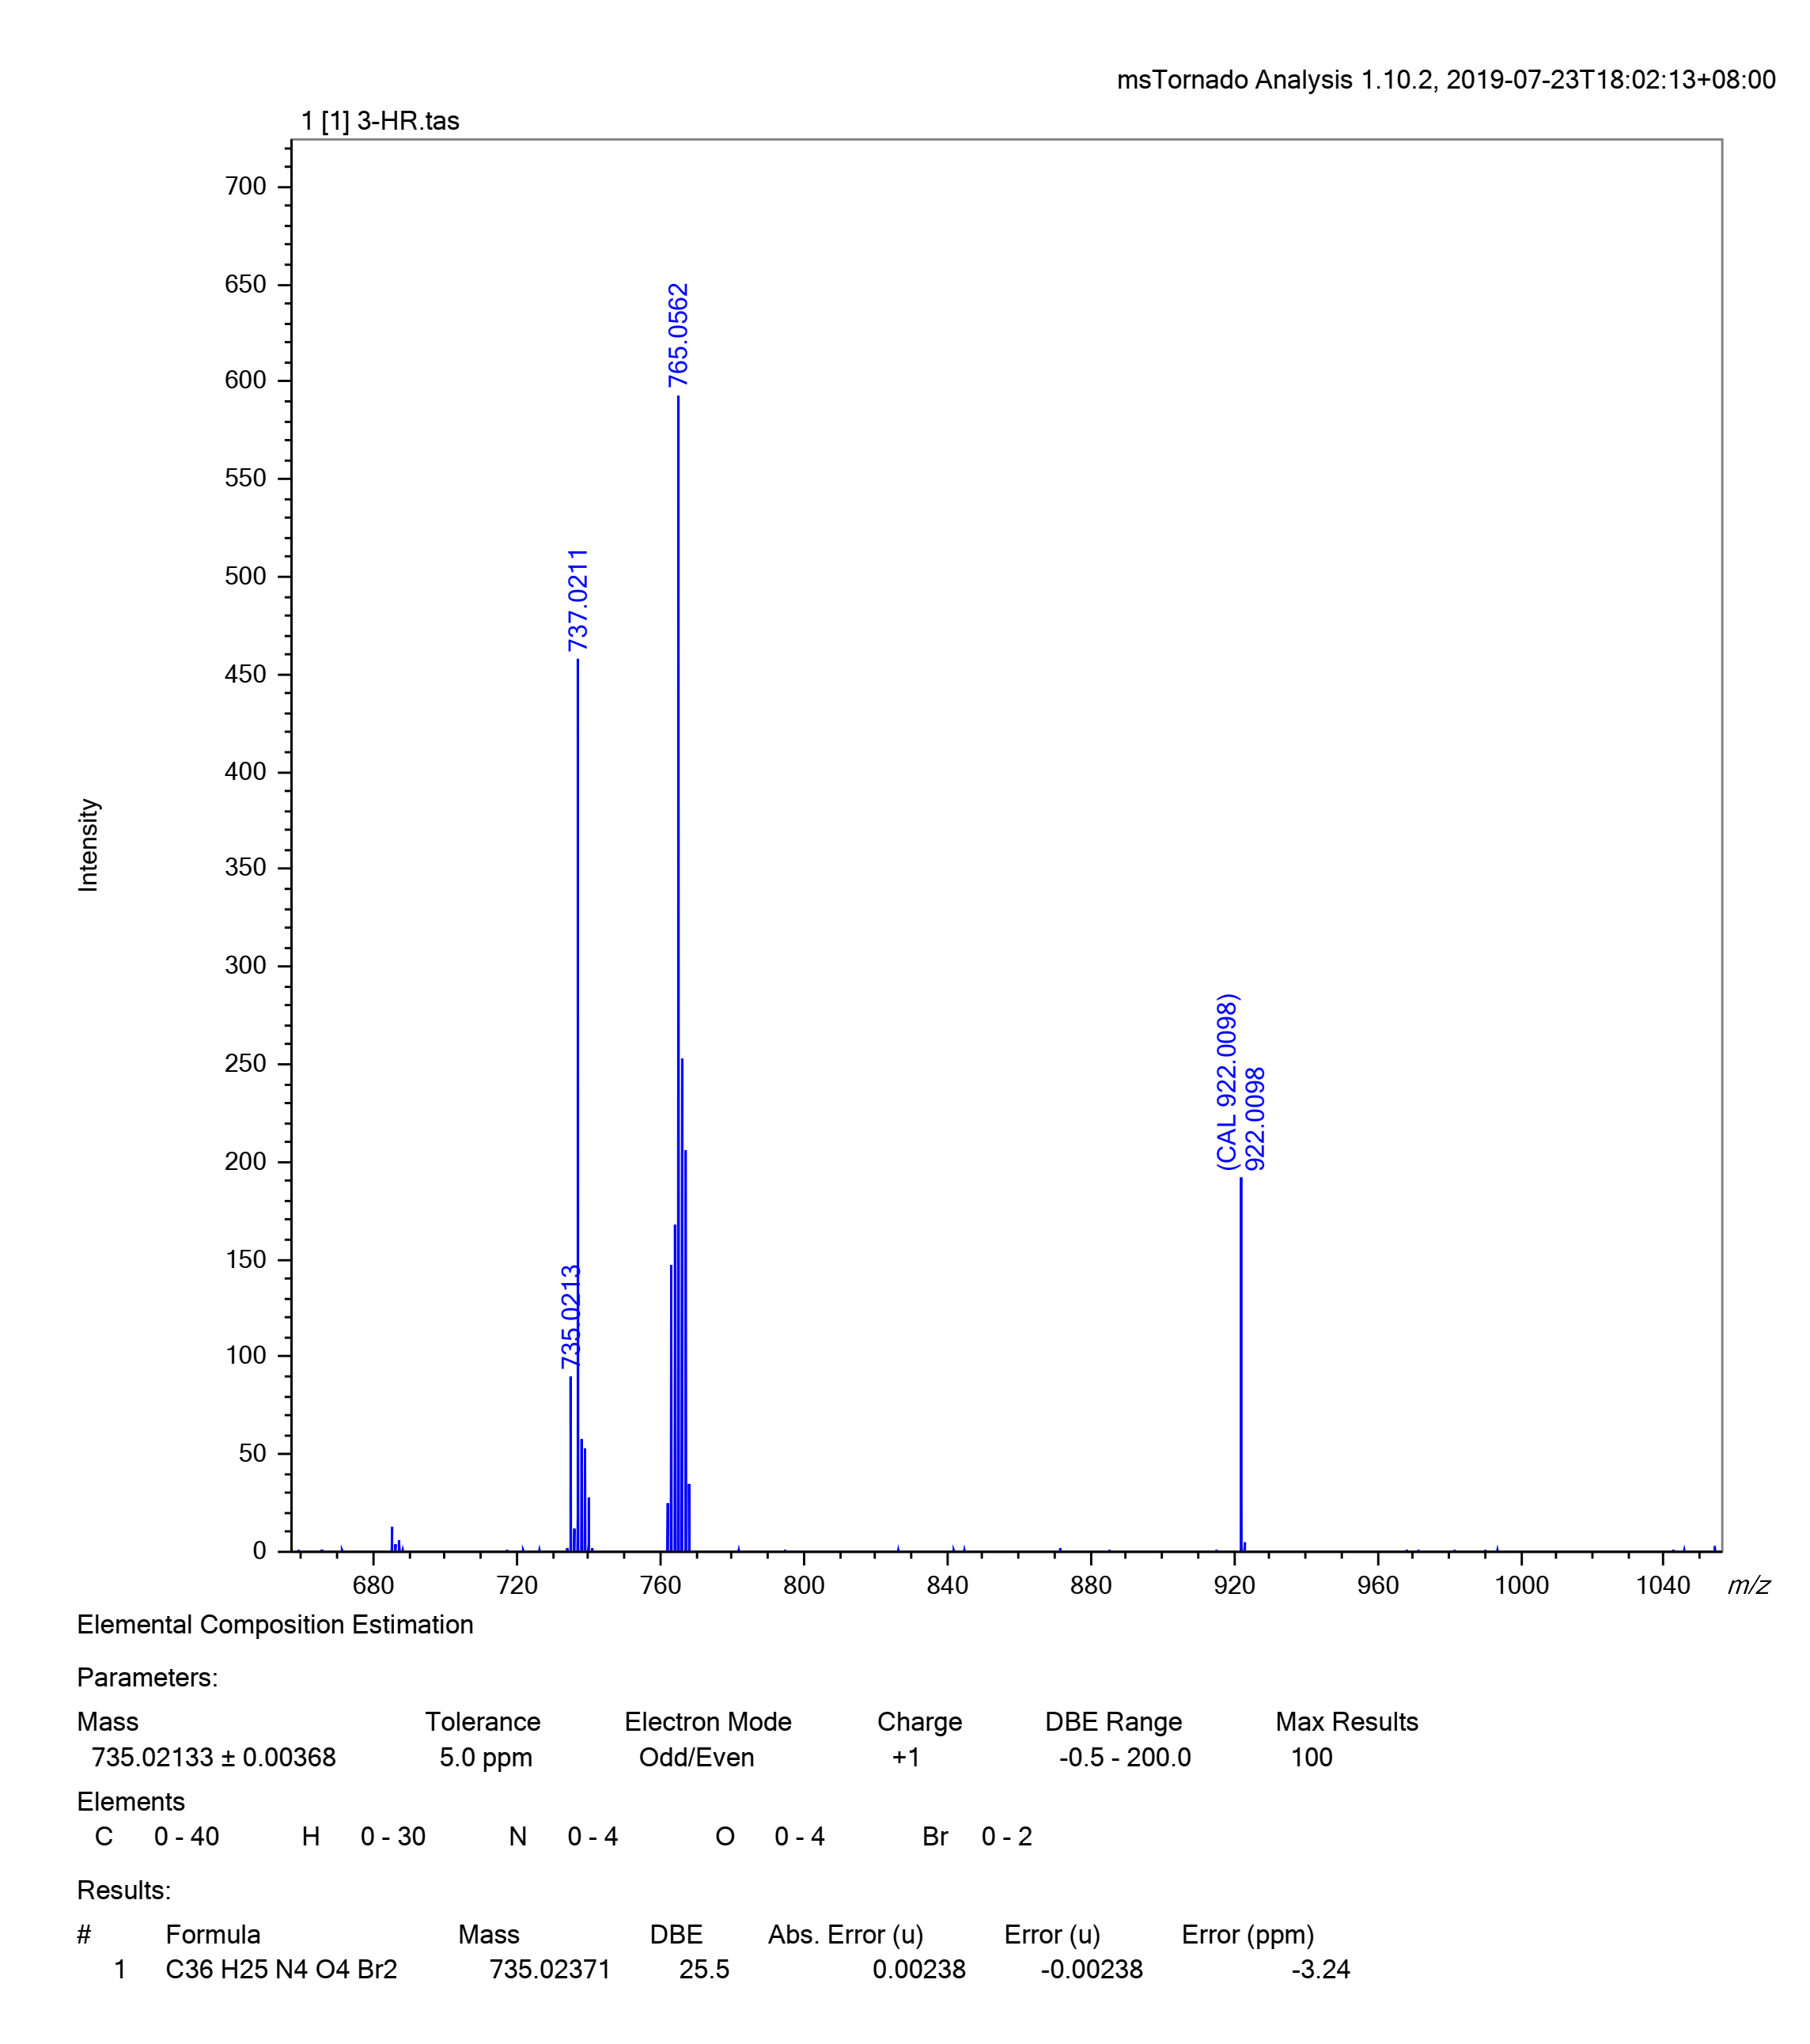


**Figure S12-3.** HRMS (MALDI-TOF) of **I1**


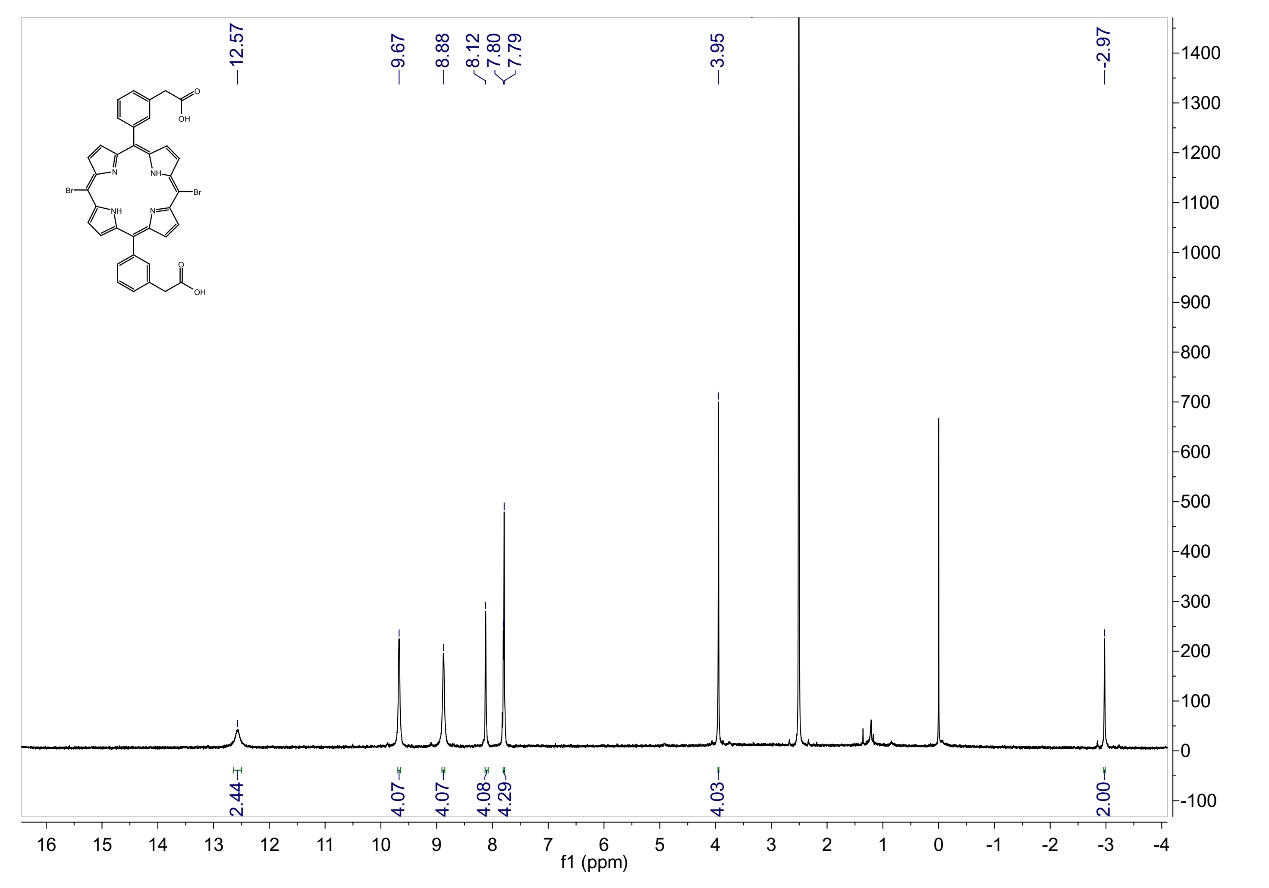


**Figure S13-1.** 1H NMR (DMSO-*d*6,400 MHz) of **I2**


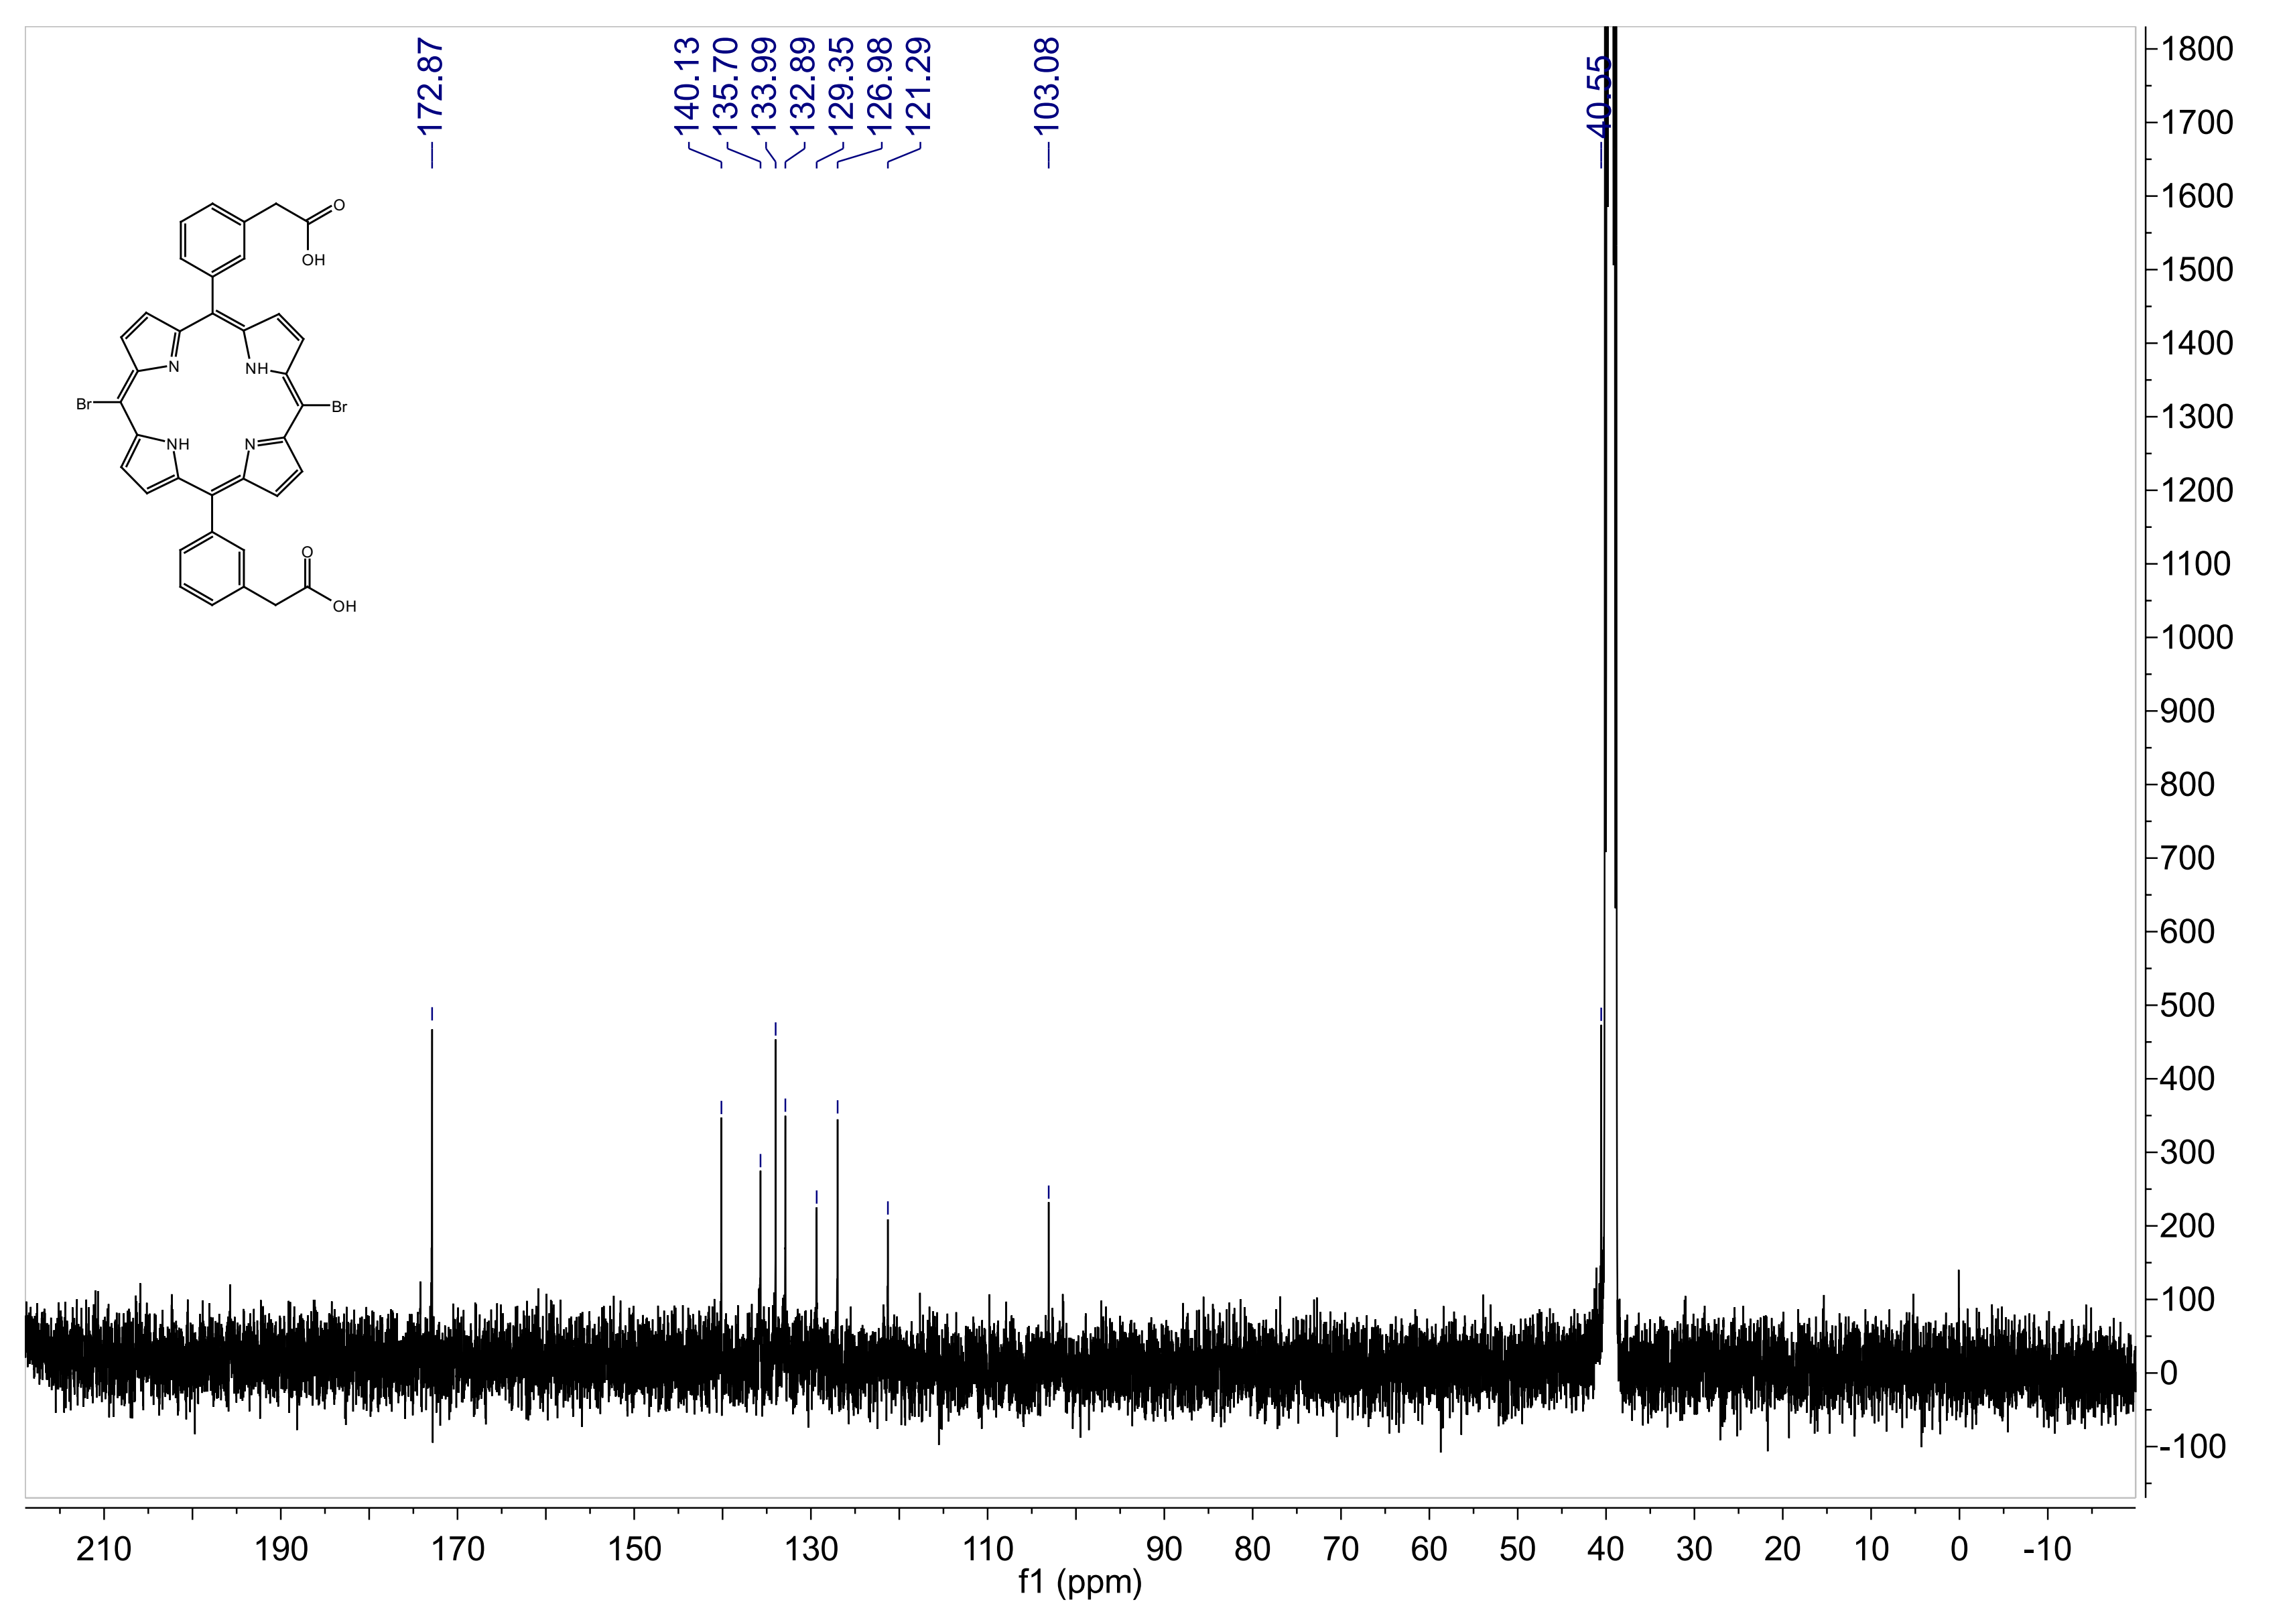


**Figure S13-2.** 13C NMR (DMSO-*d*6,101 MHz) of **I2**


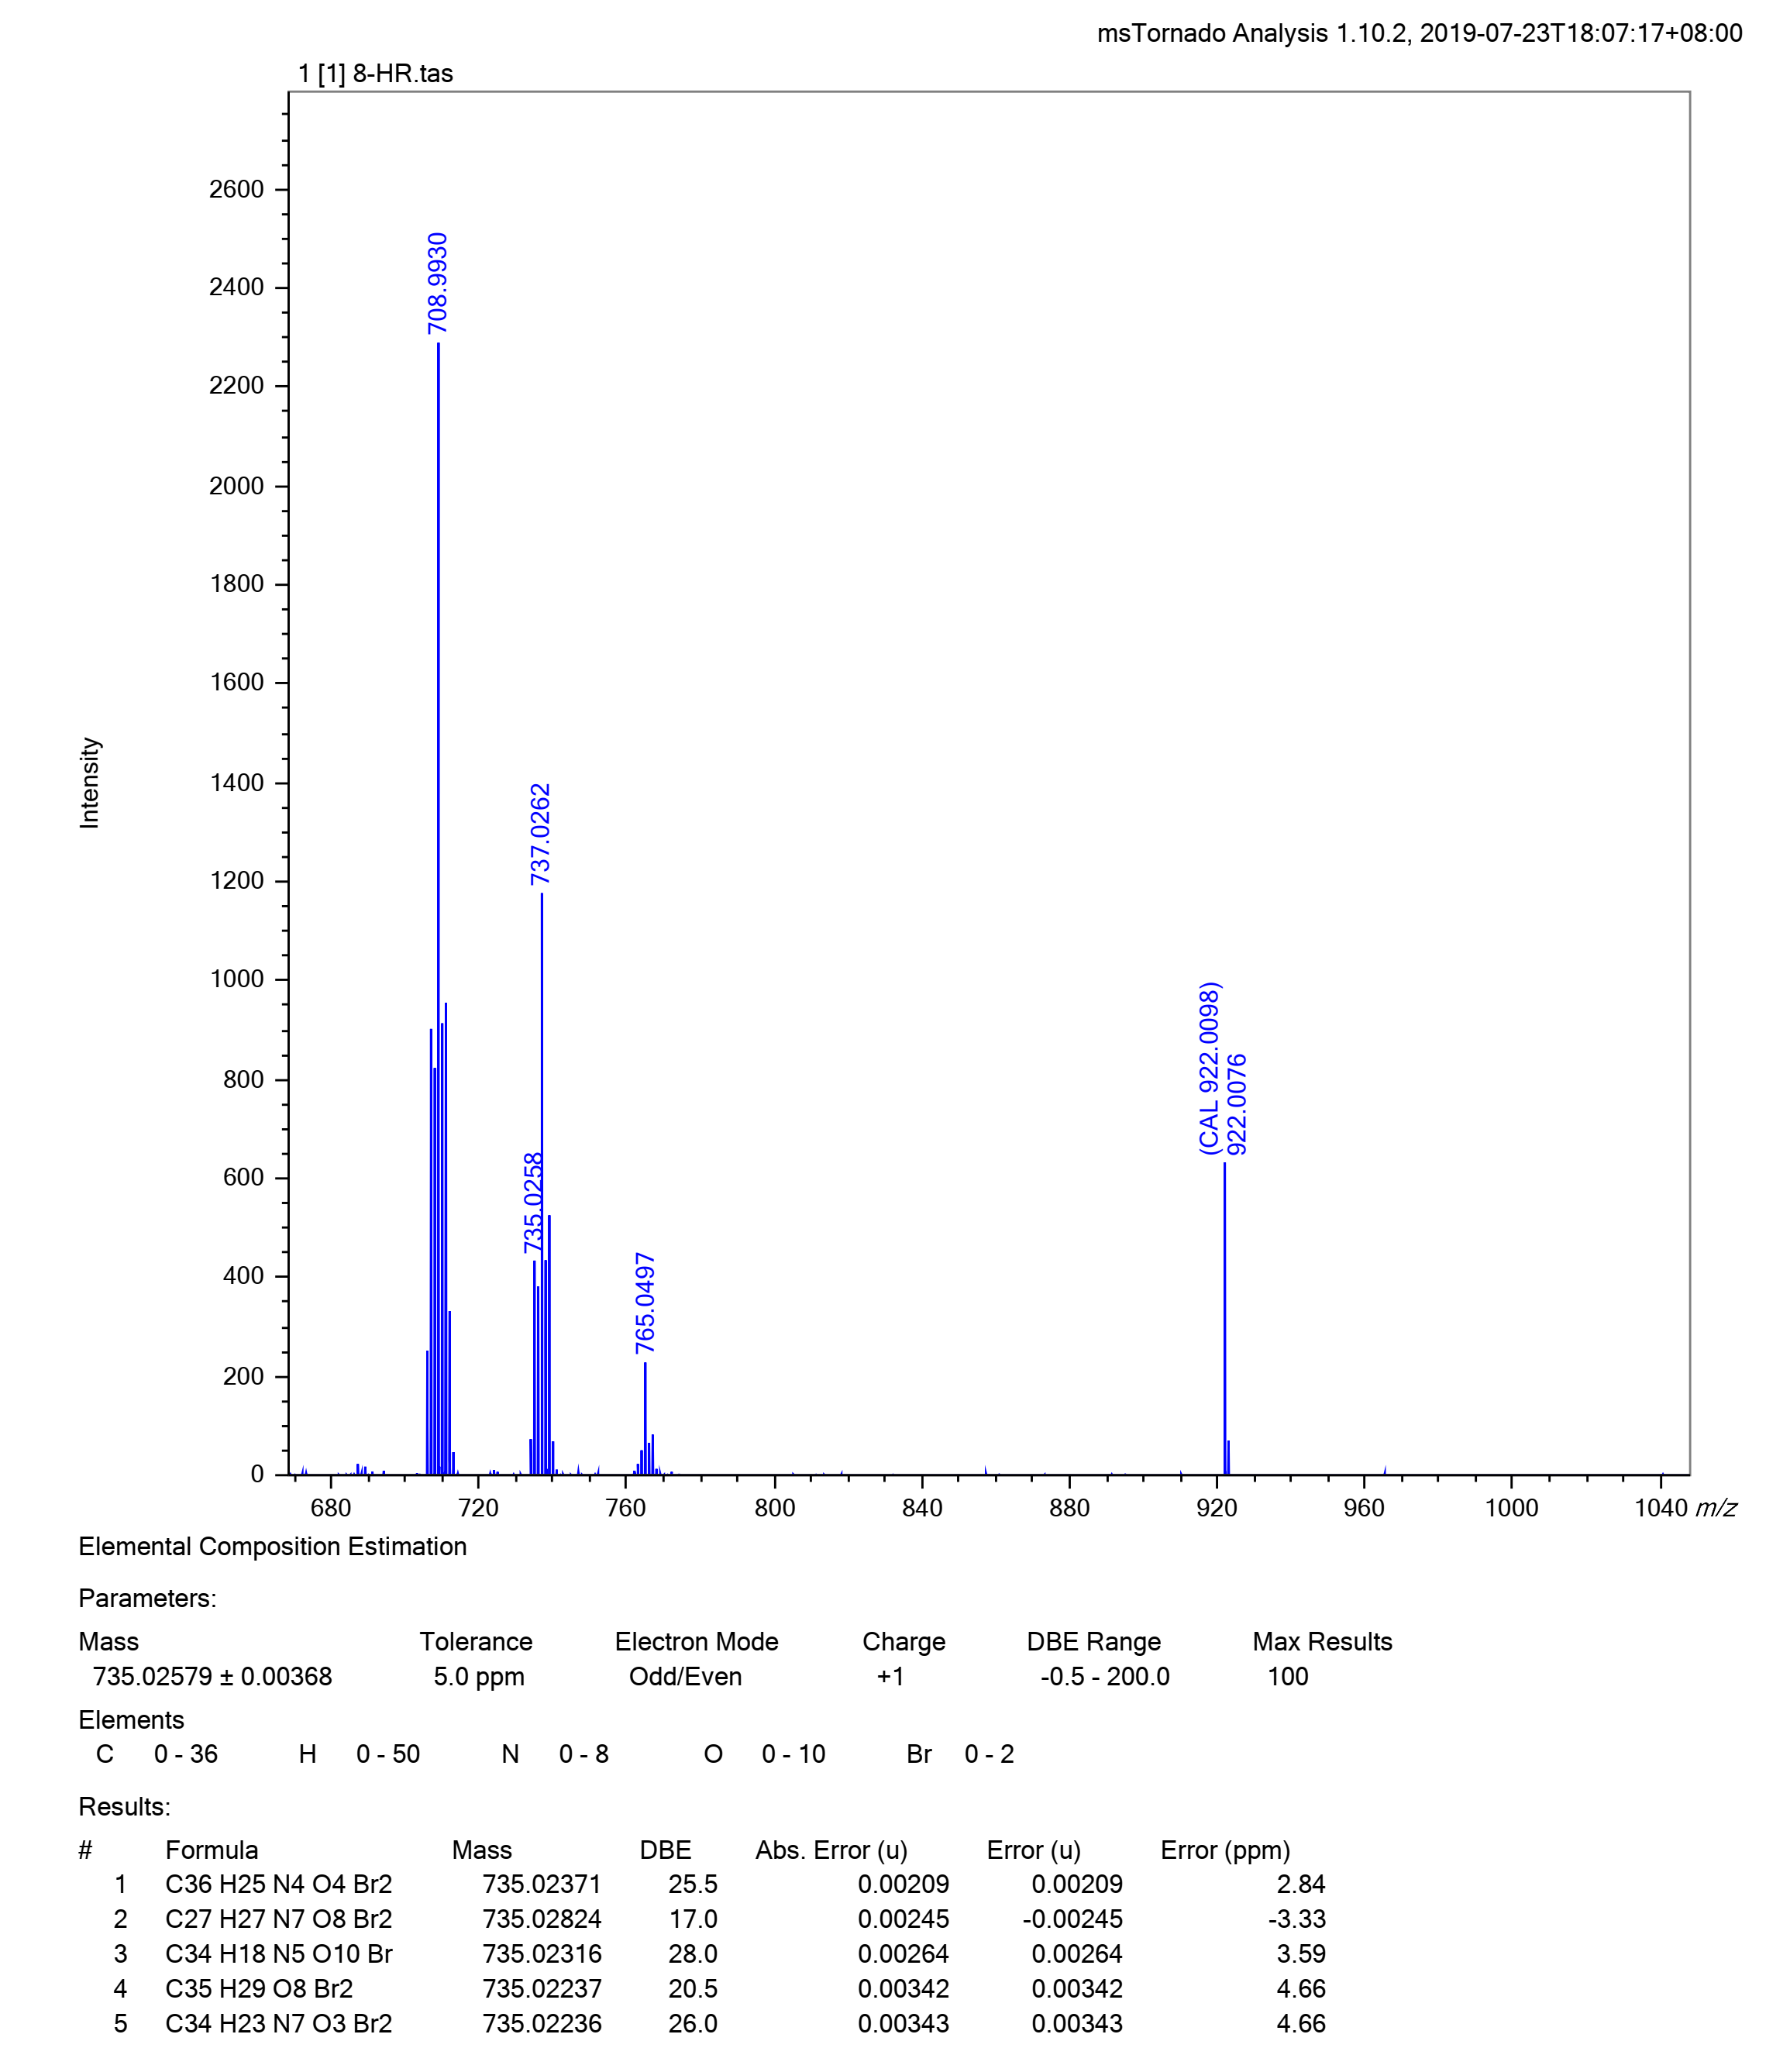


**Figure S13-3.** HRMS (MALDI-TOF) of **I2**


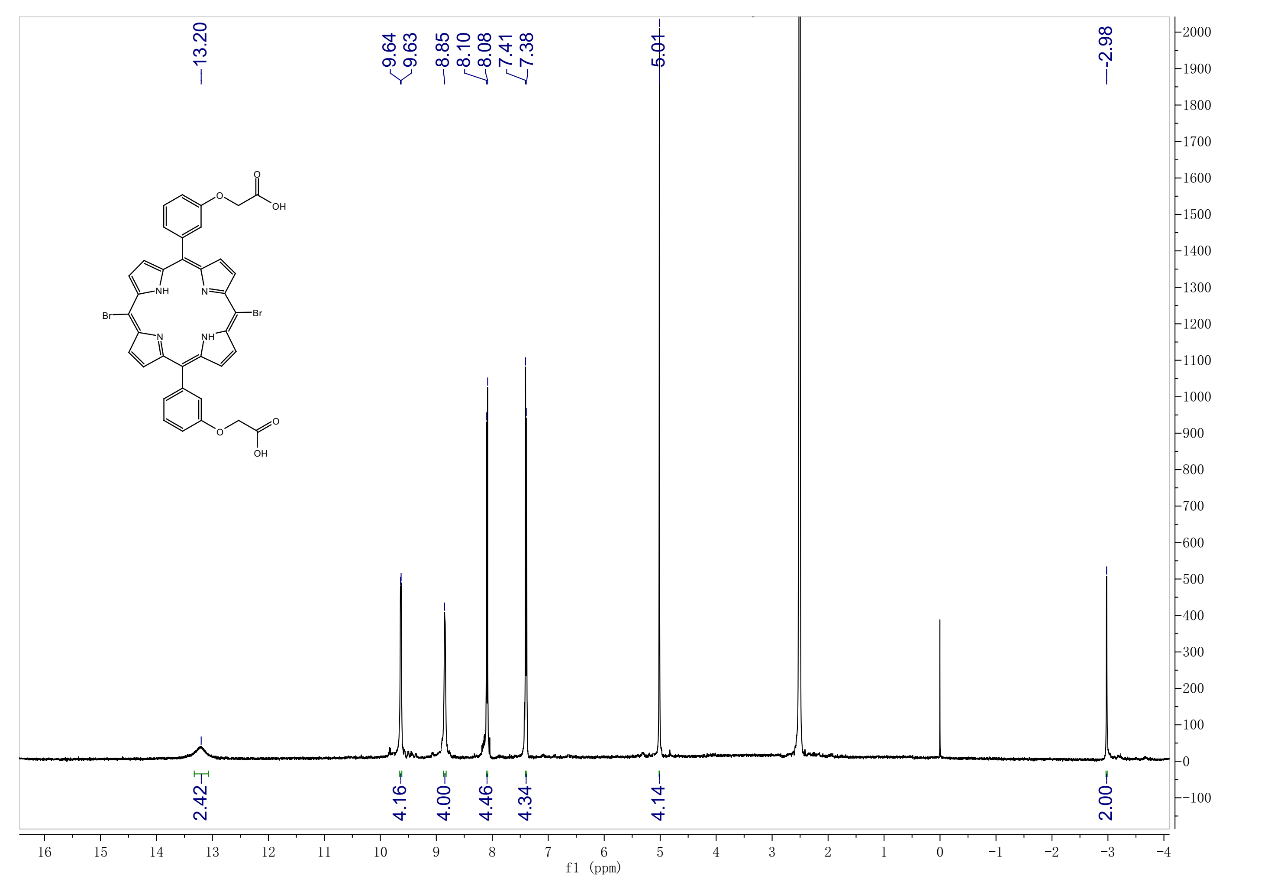


**Figure S14-1.** 1H NMR (DMSO-*d*6,400 MHz) of **I3**


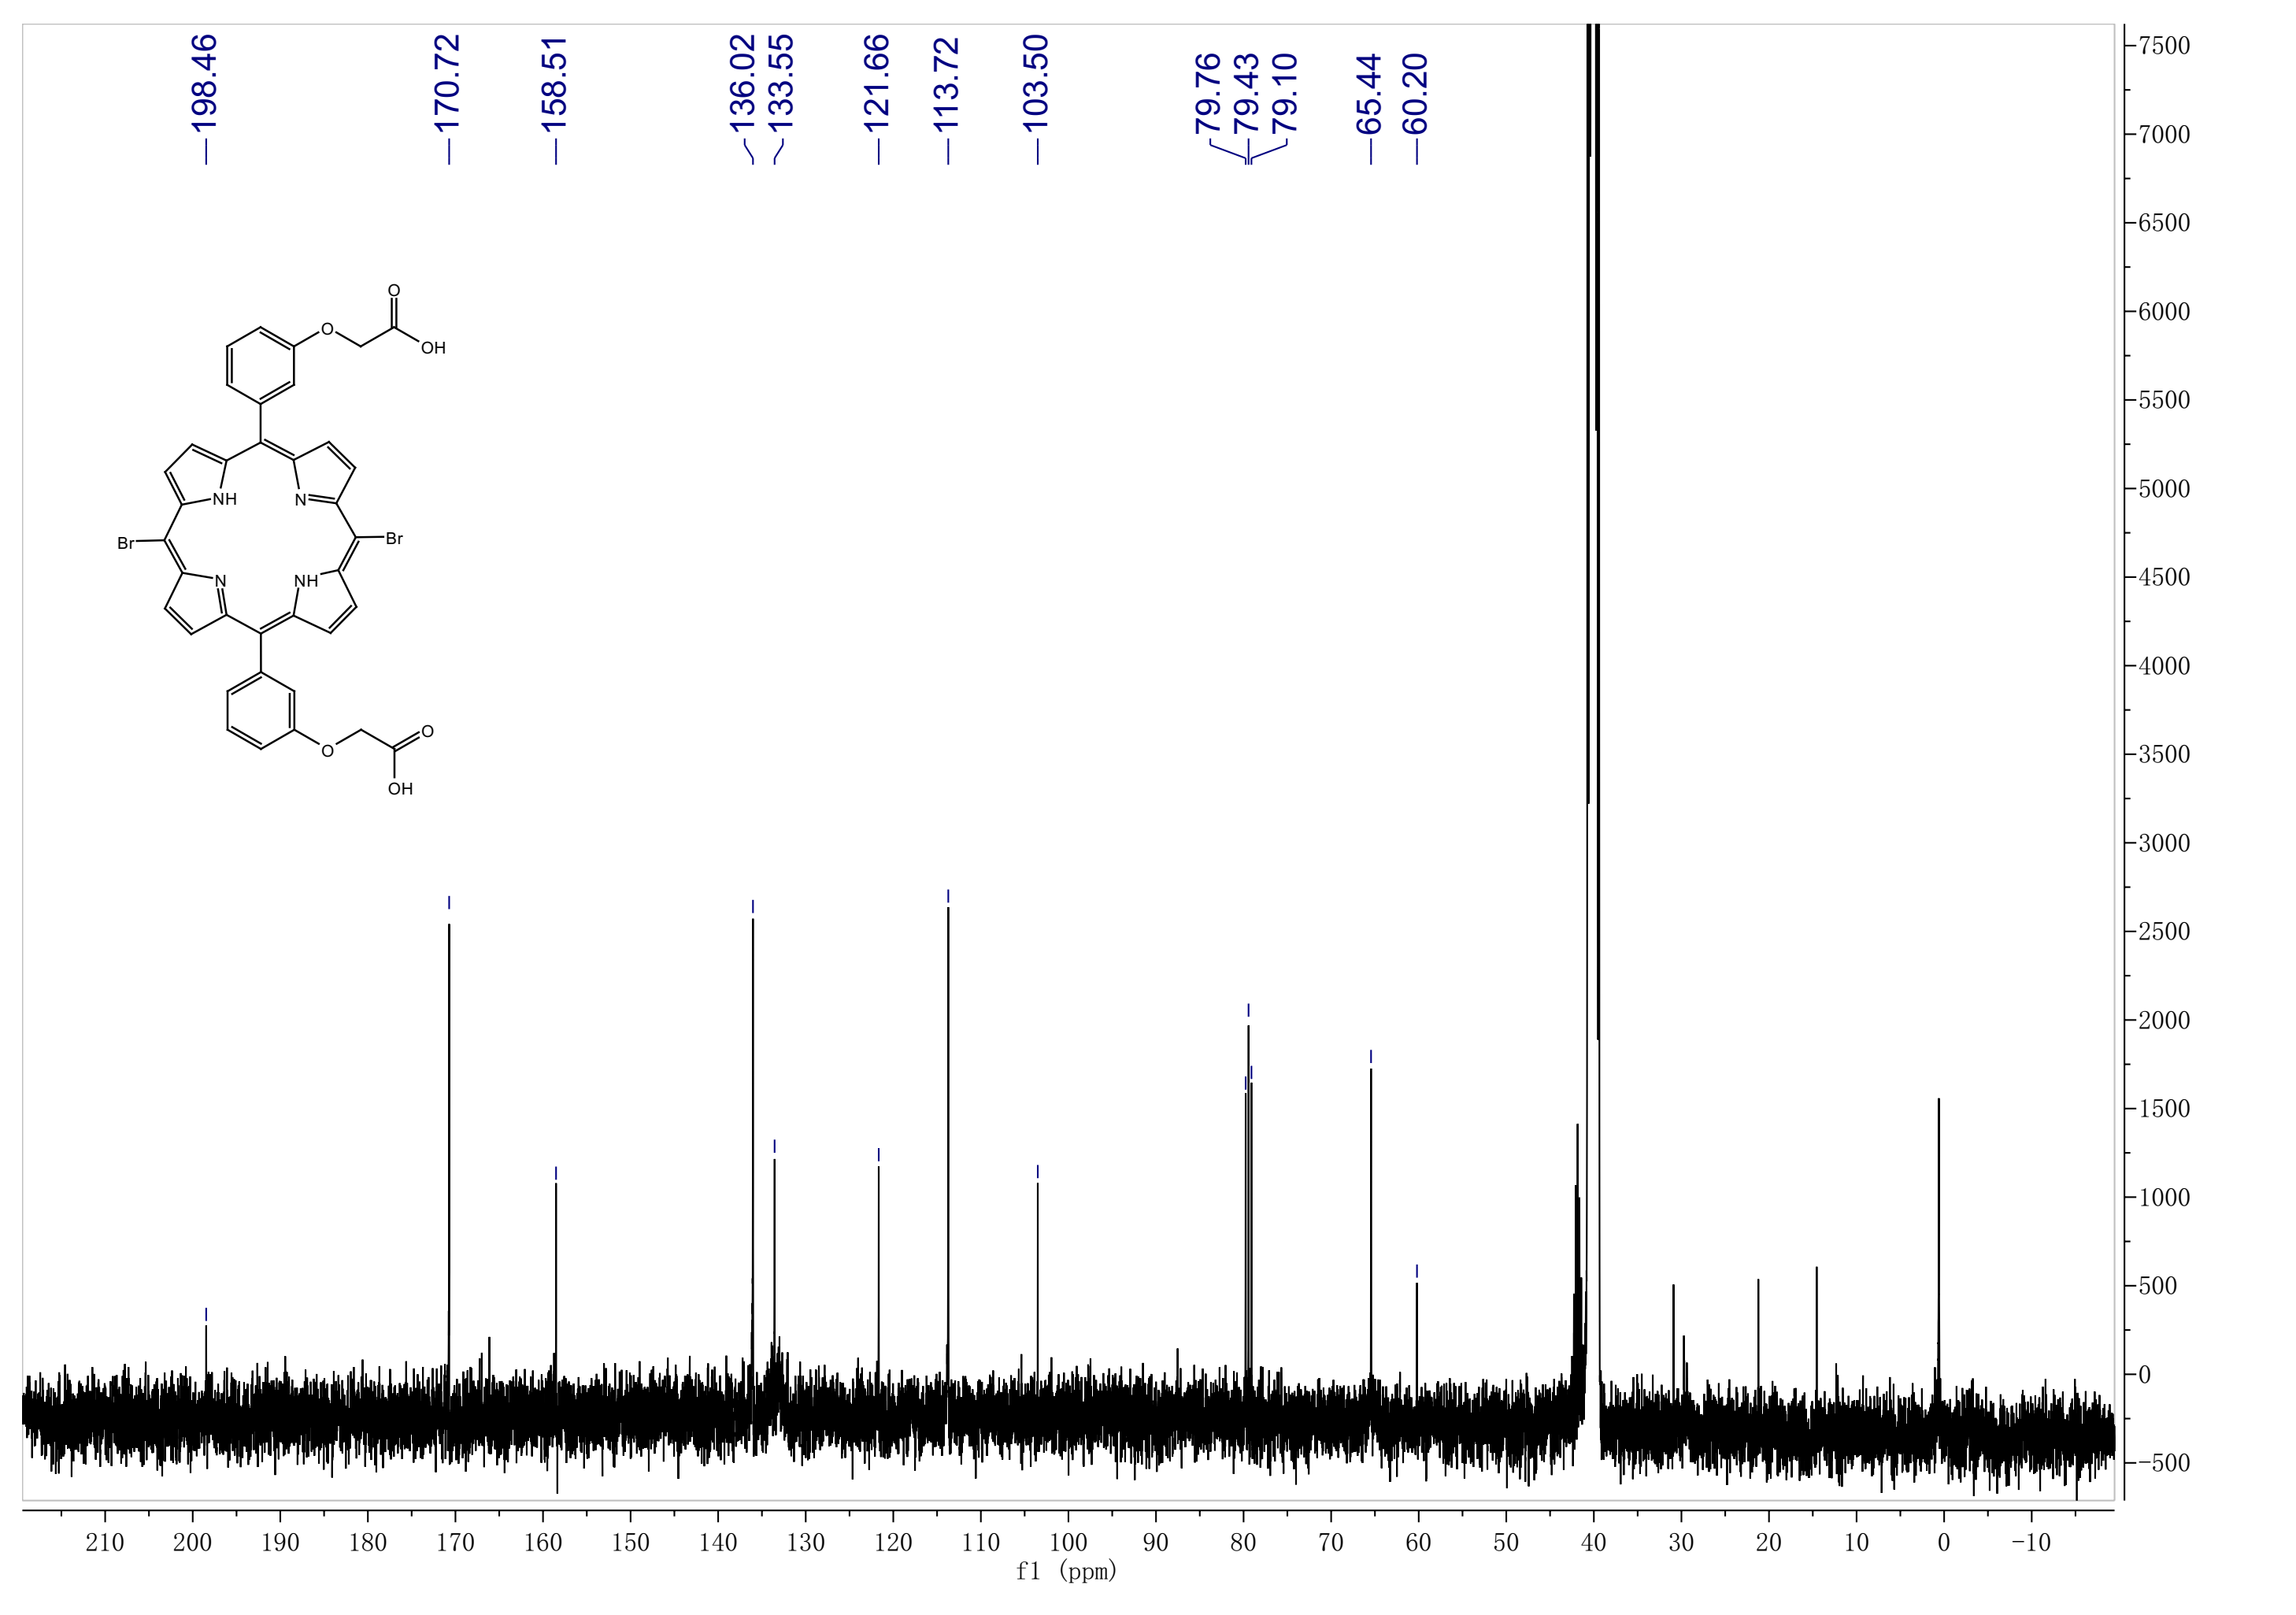


**Figure S14-2.** 13C NMR (DMSO-*d*6,101 MHz) of **I3**


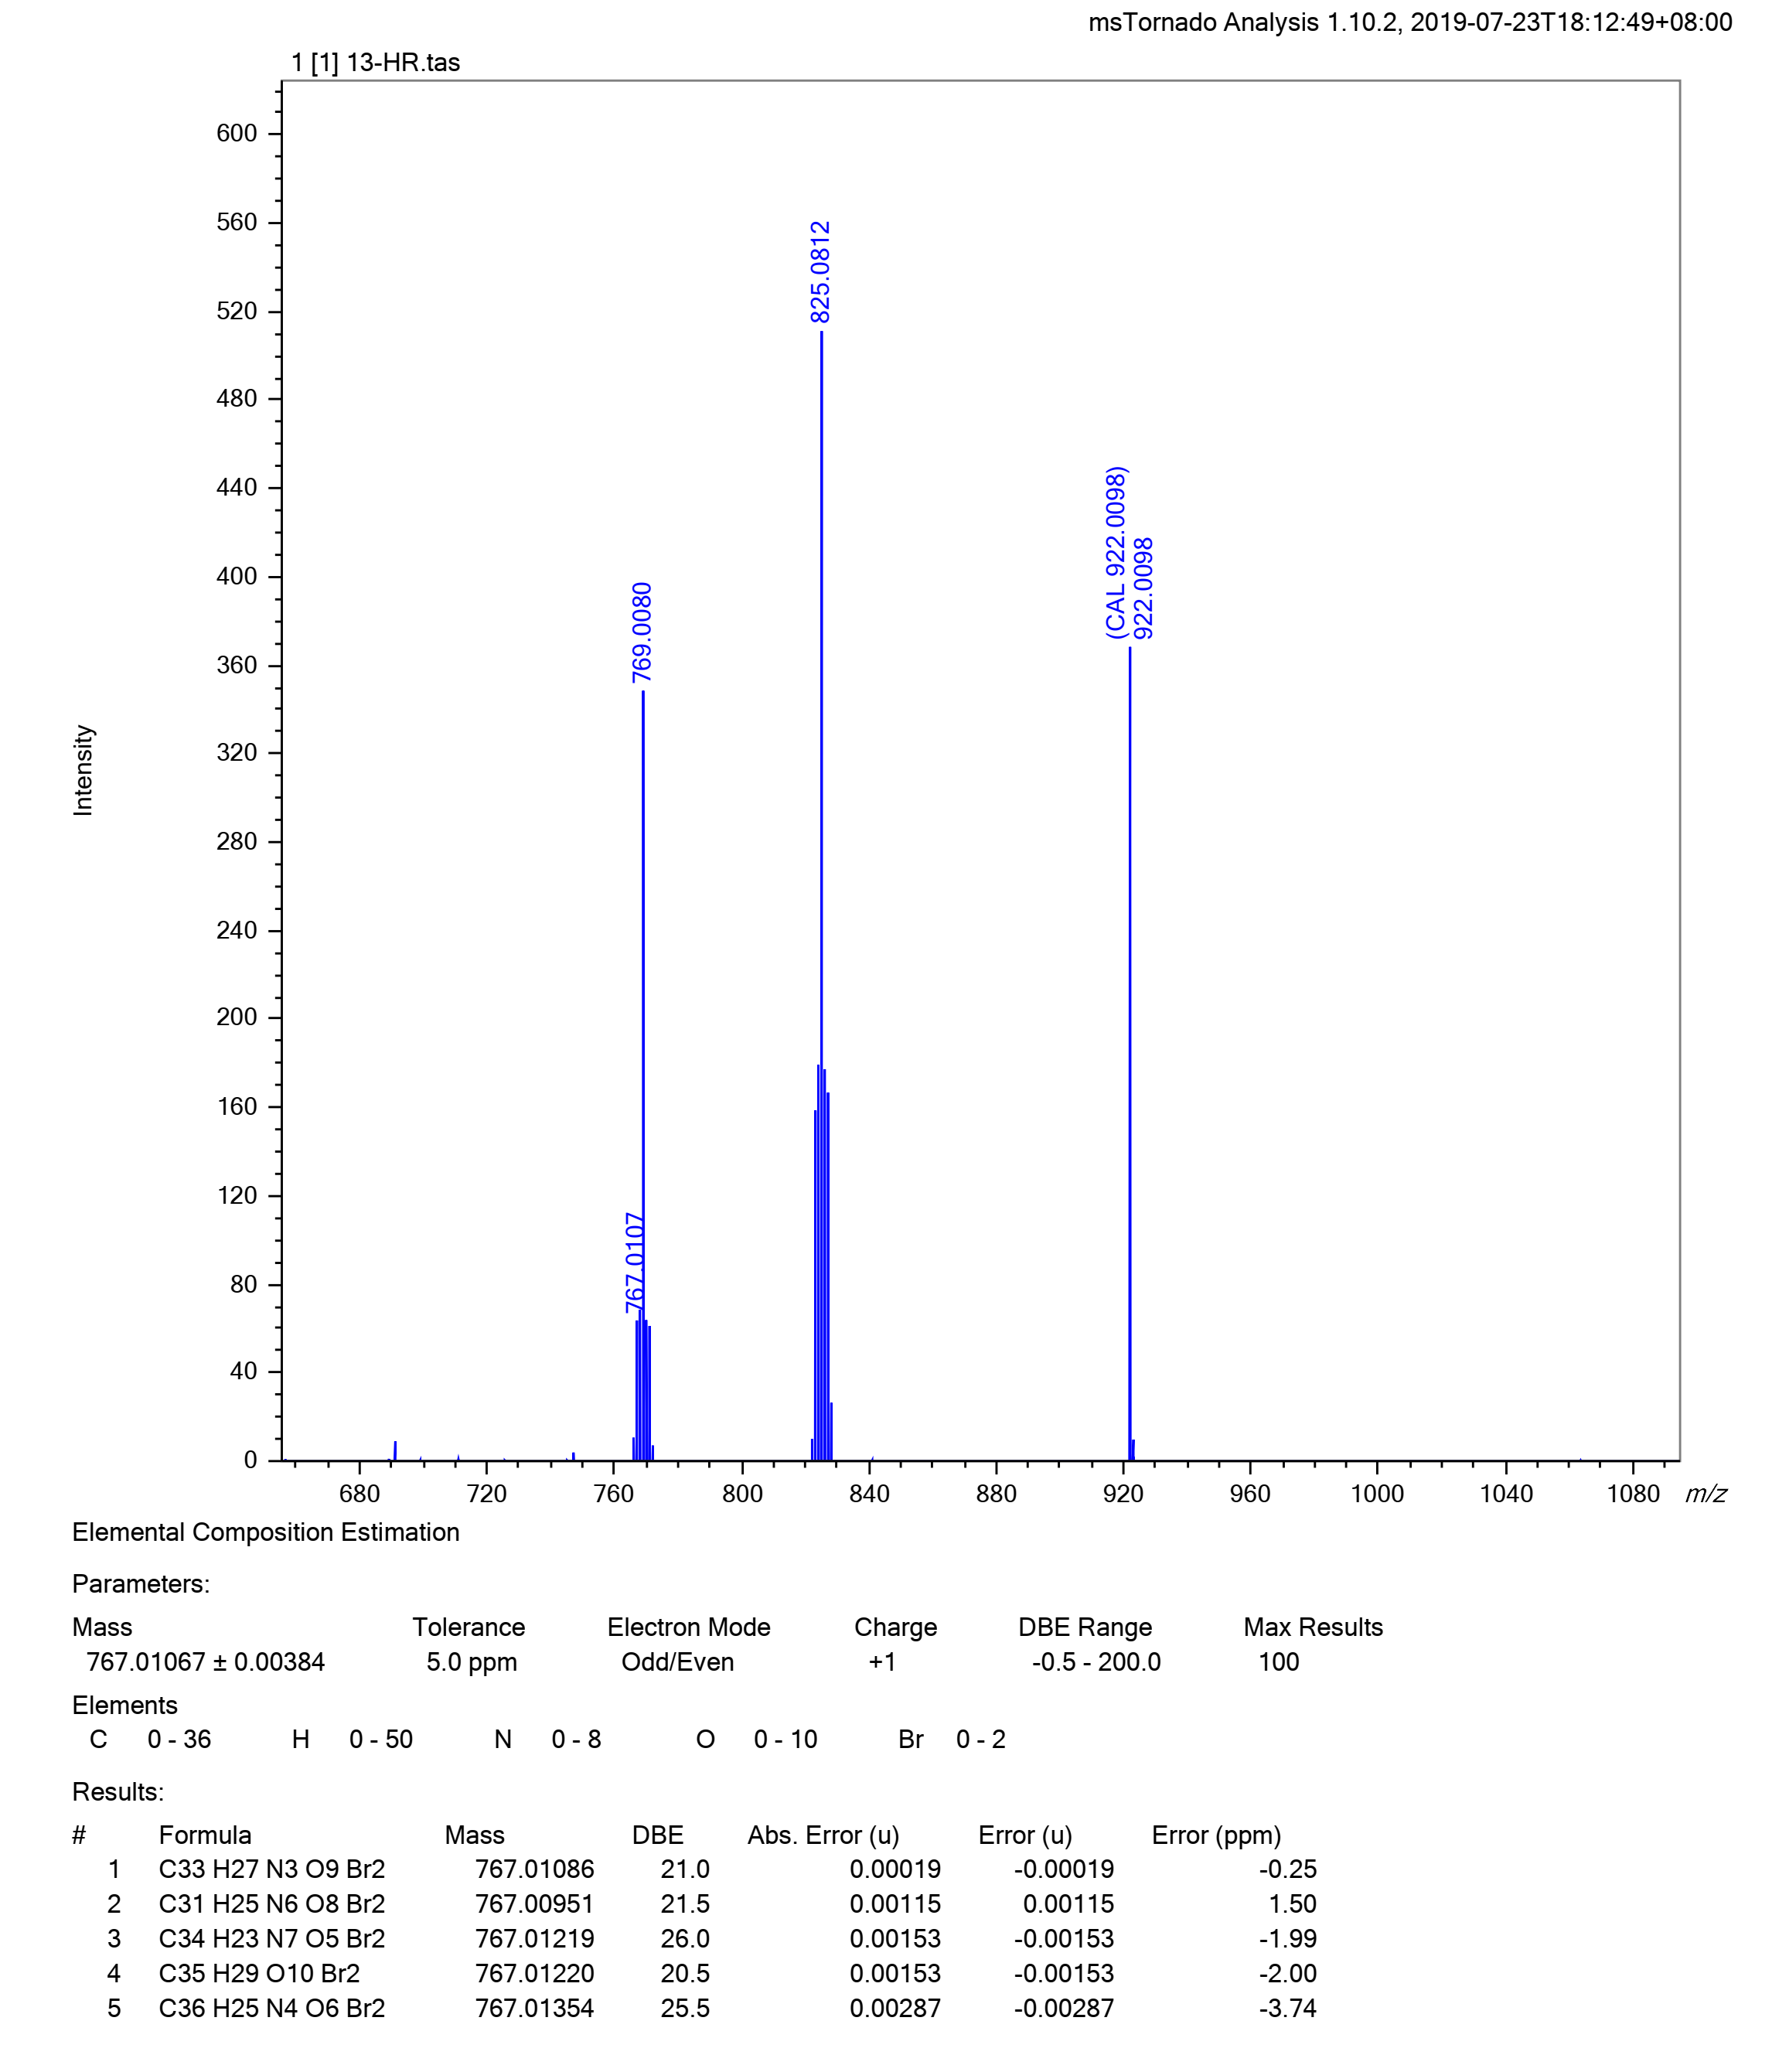


**Figure S14-3.** HRMS (MALDI-TOF) of **I3**


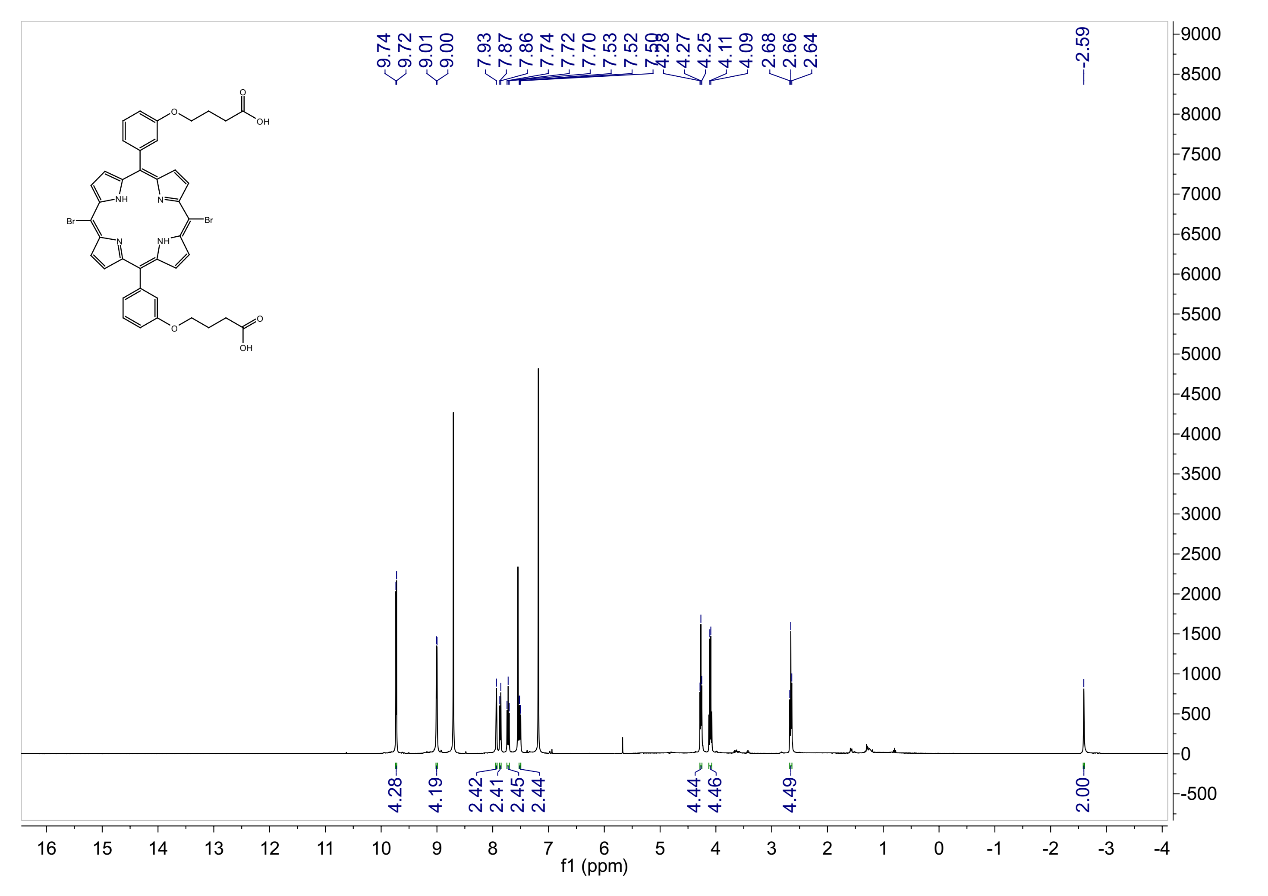


**Figure S15-1.** 1H NMR (Pyr-*d5*,400 MHz) of **I4**


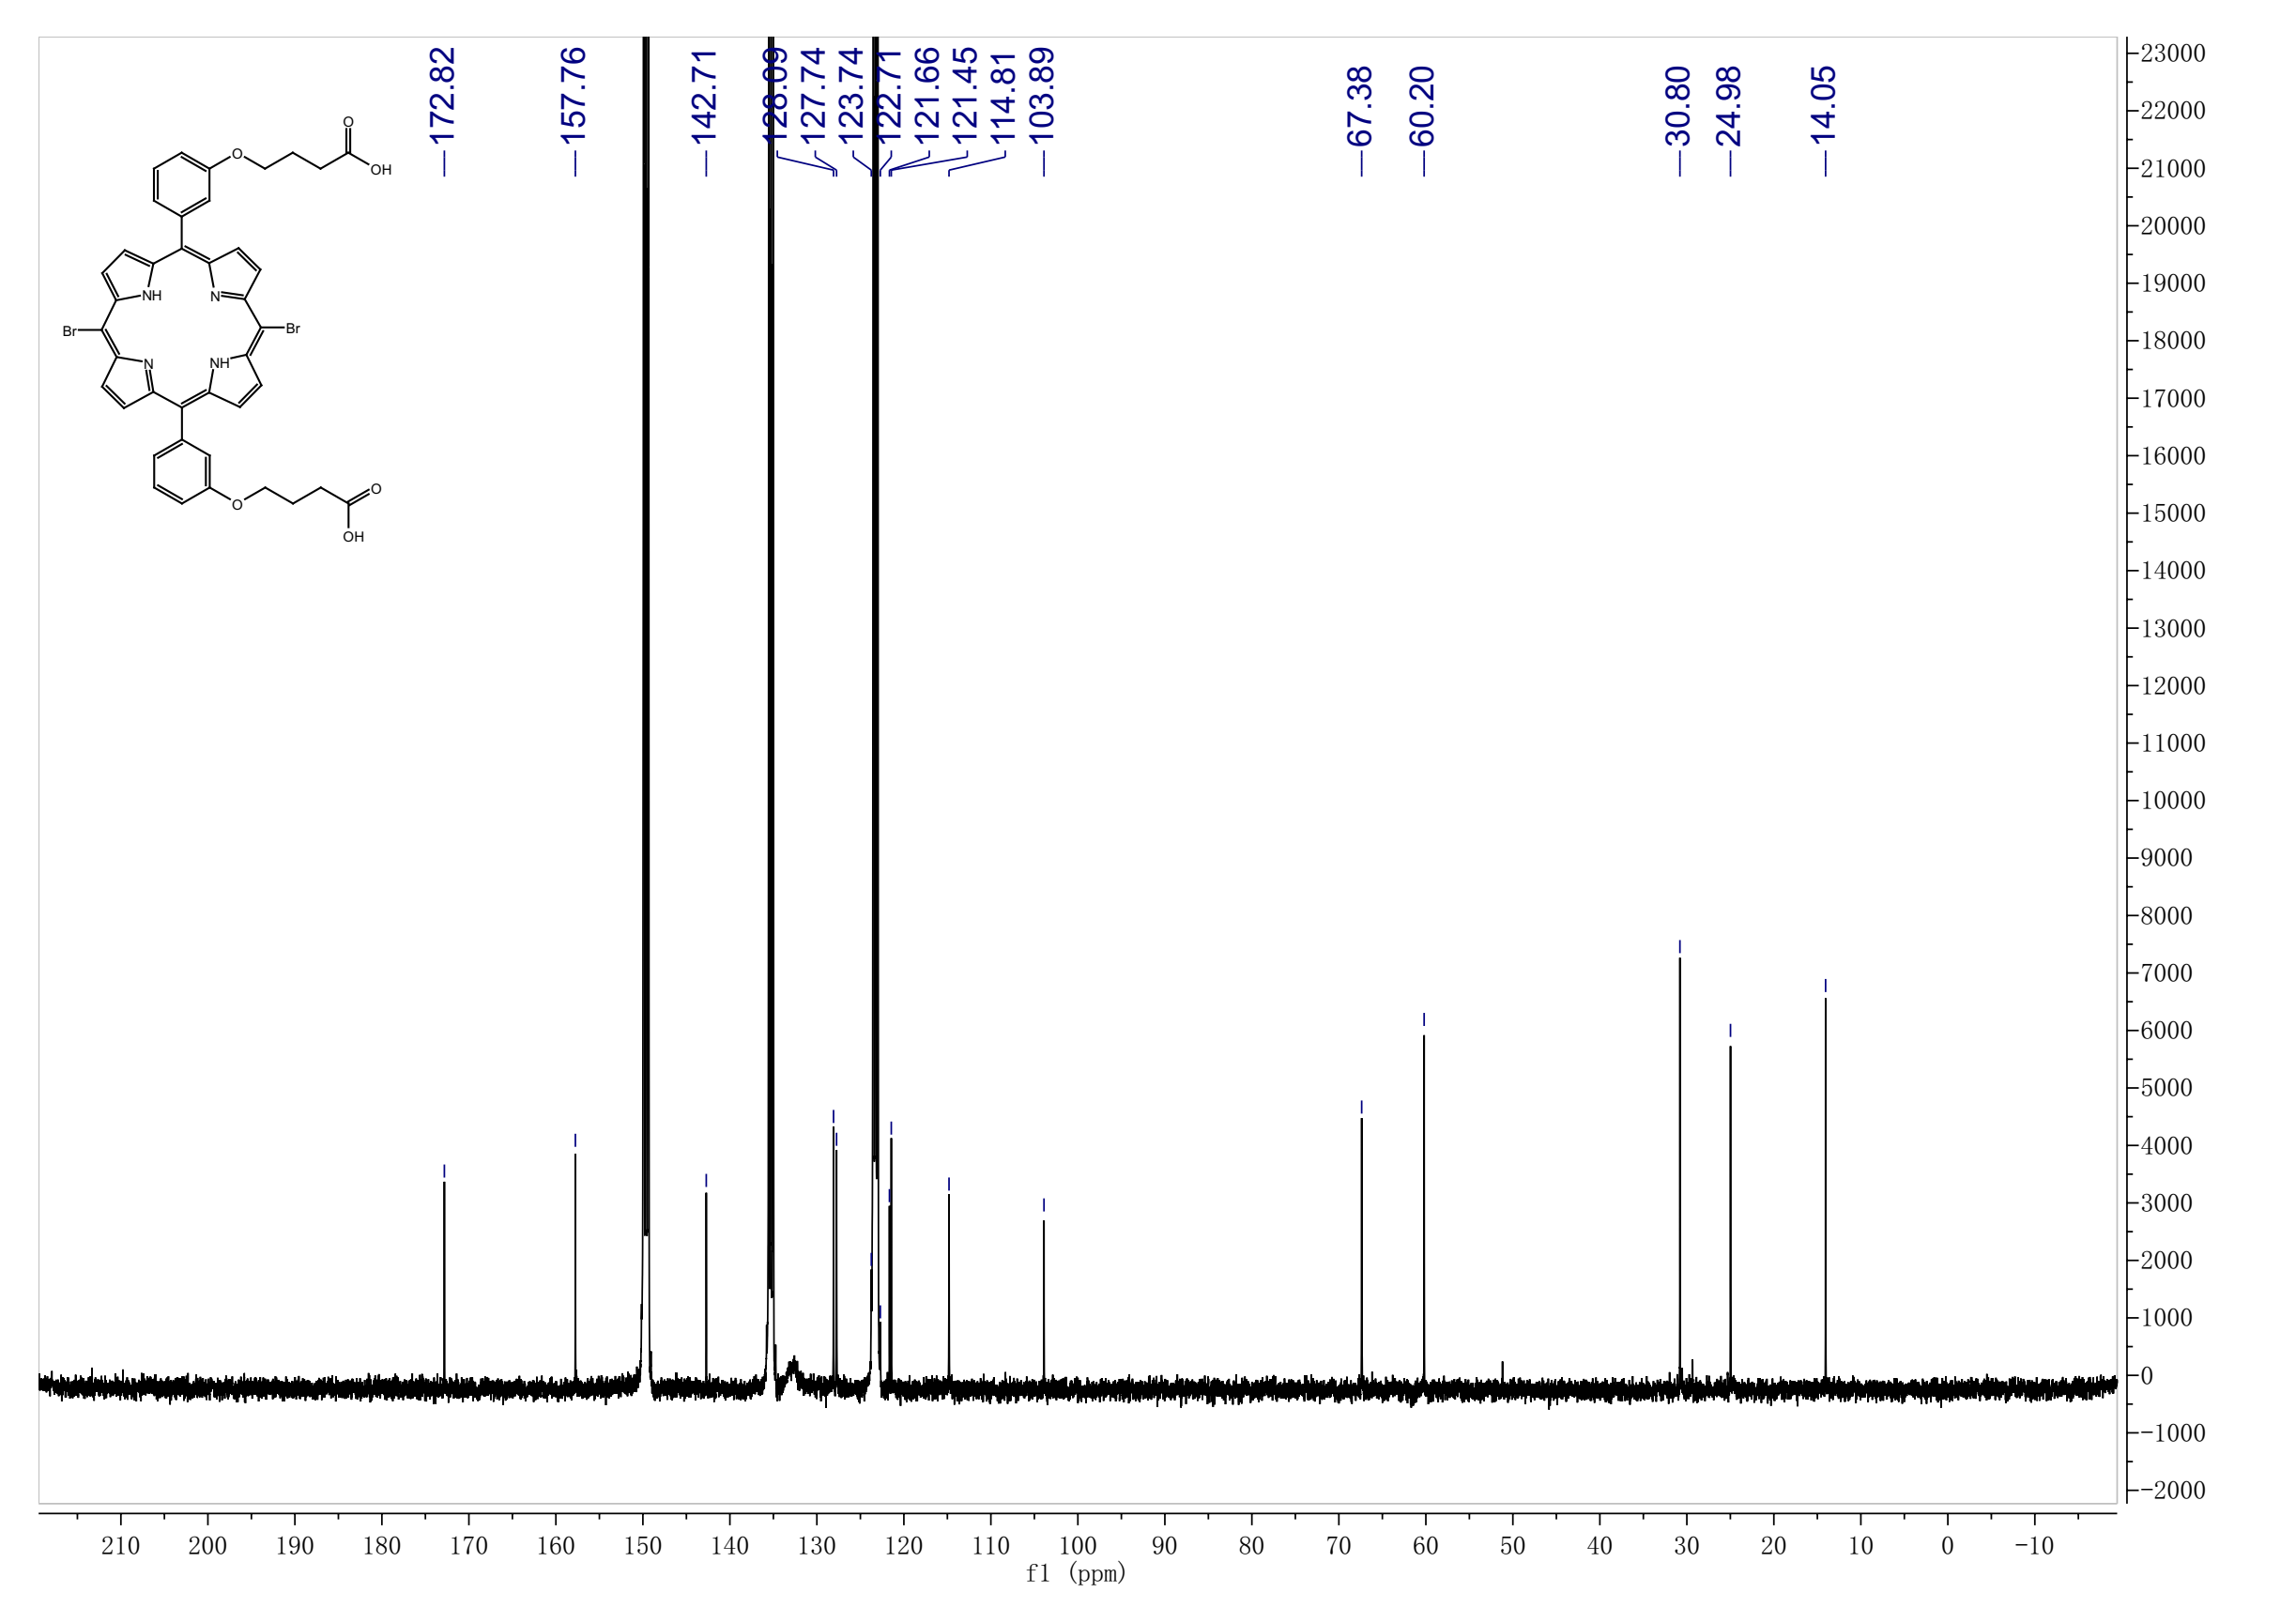


**Figure S15-2.** 13C NMR (Pyr-*d5*,101 MHz) of **I4**


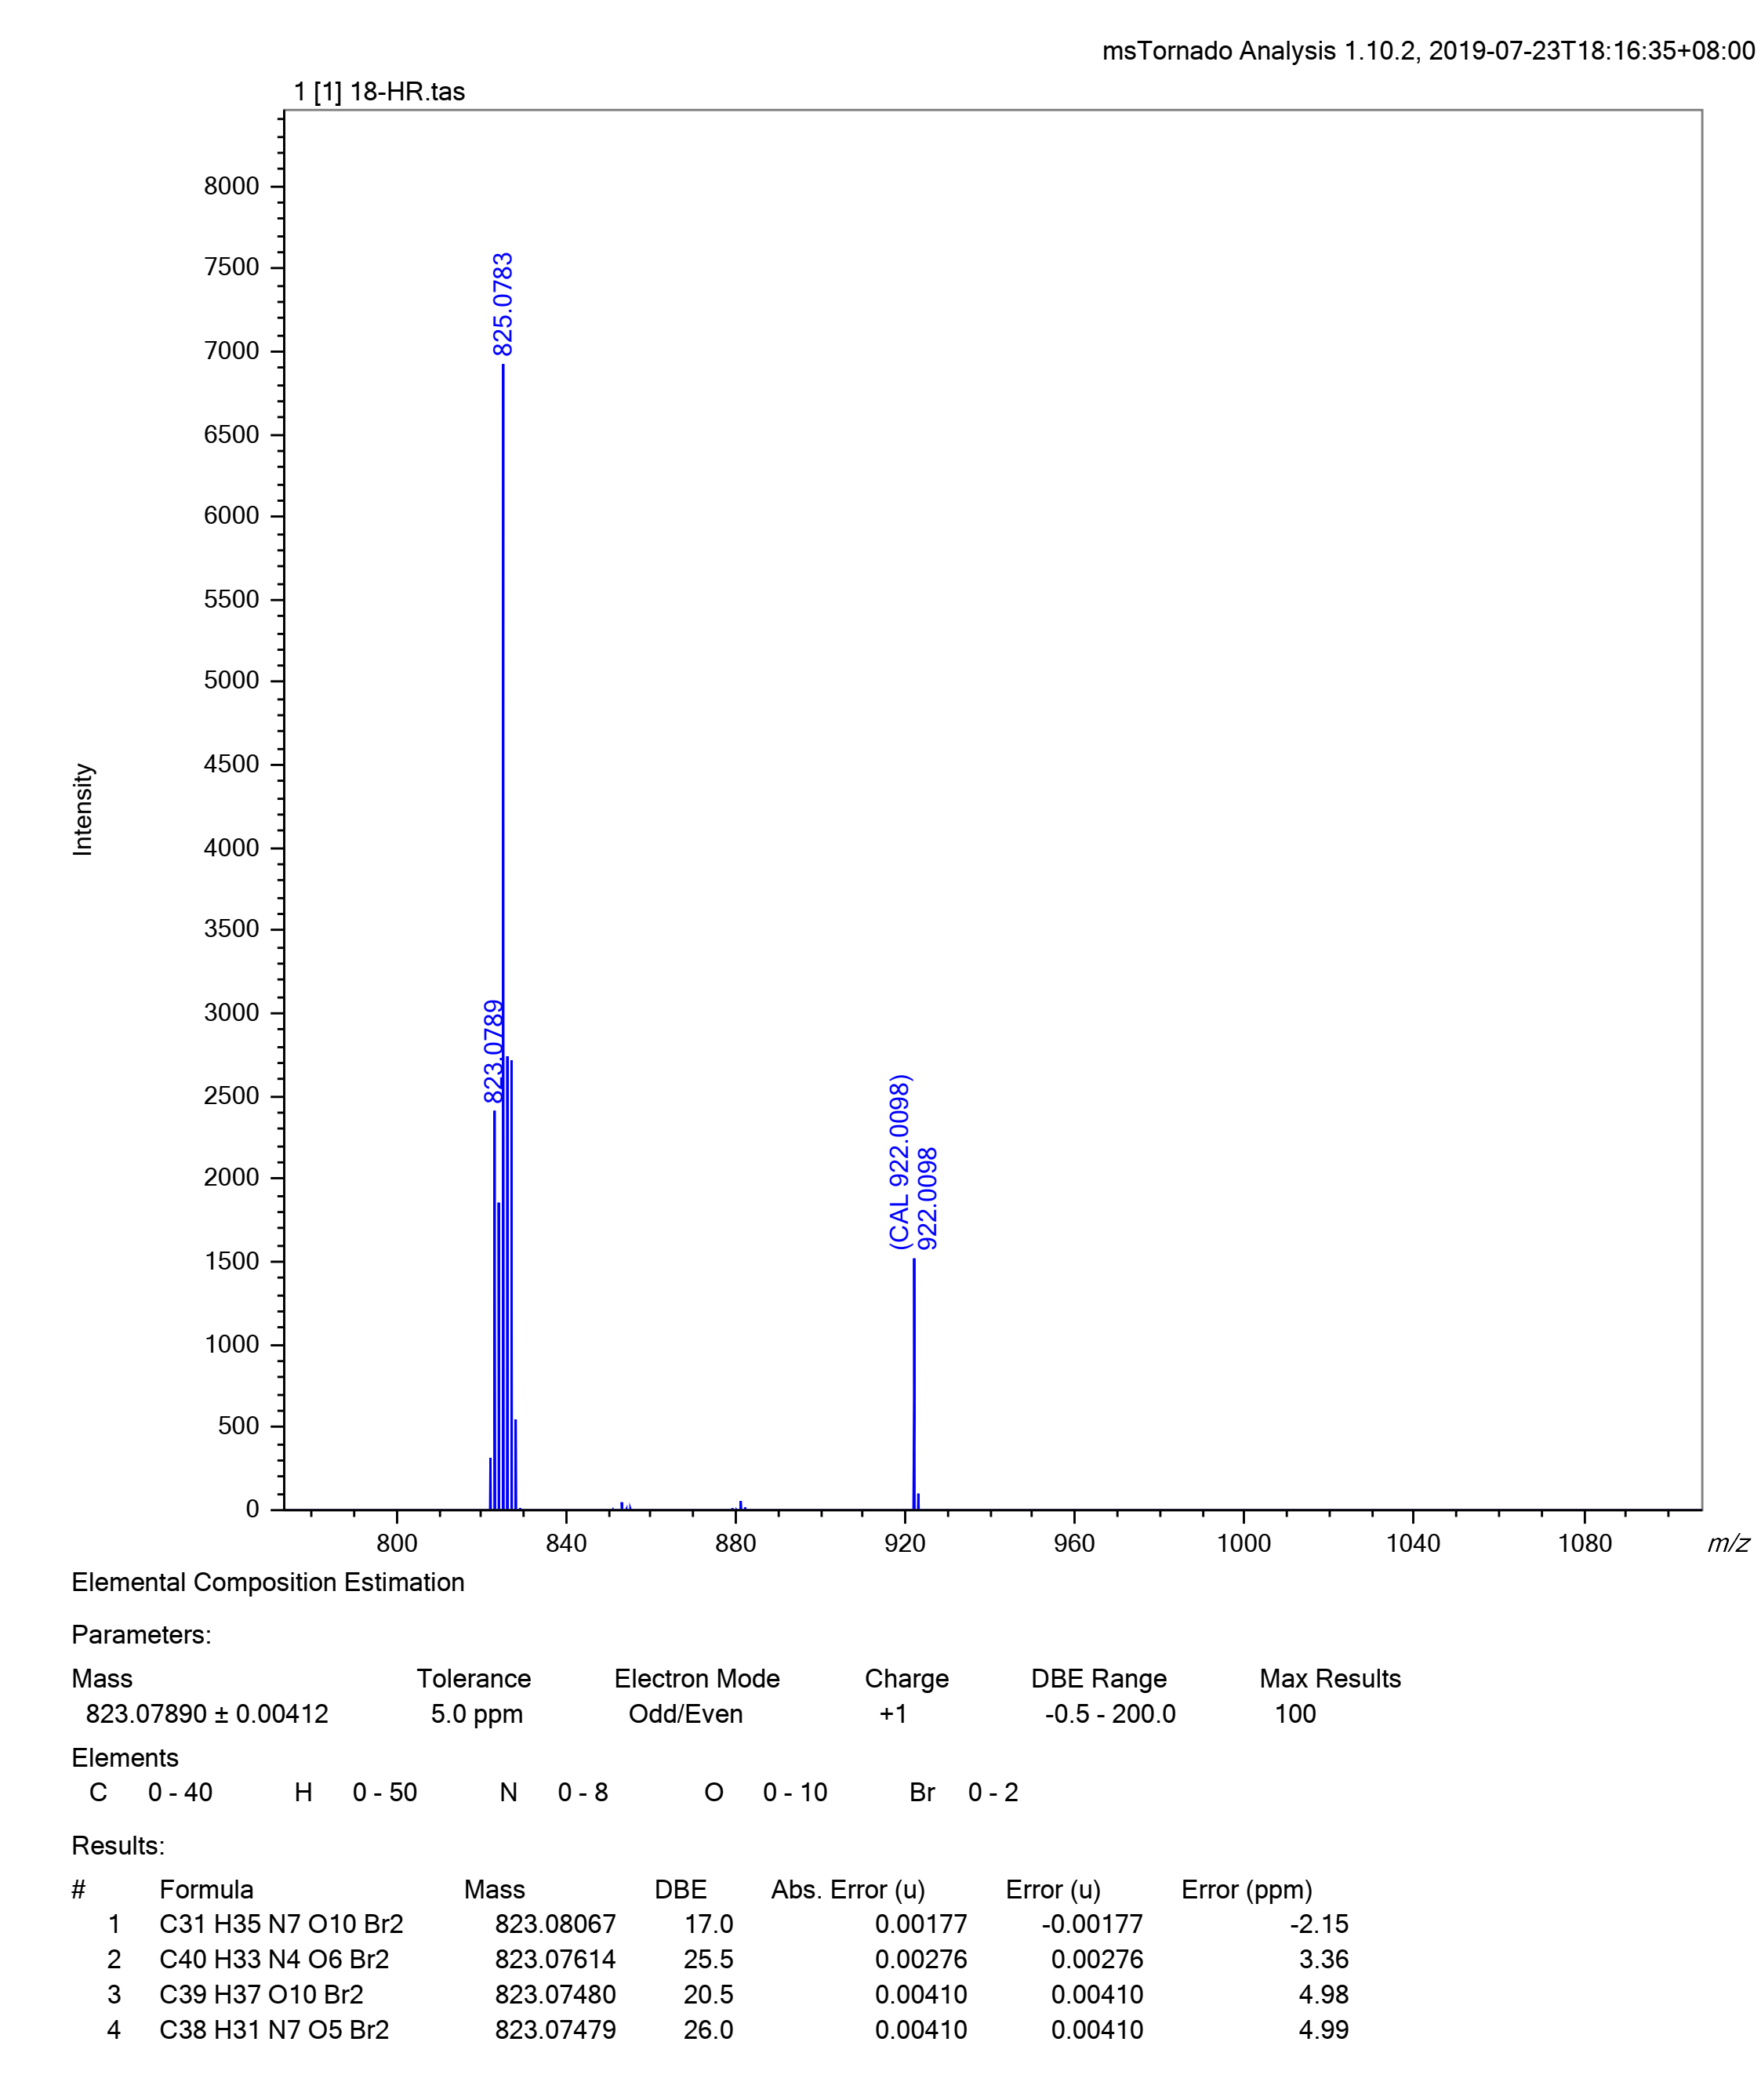


**Figure S15-3.** HRMS (MALDI-TOF) of **I4**


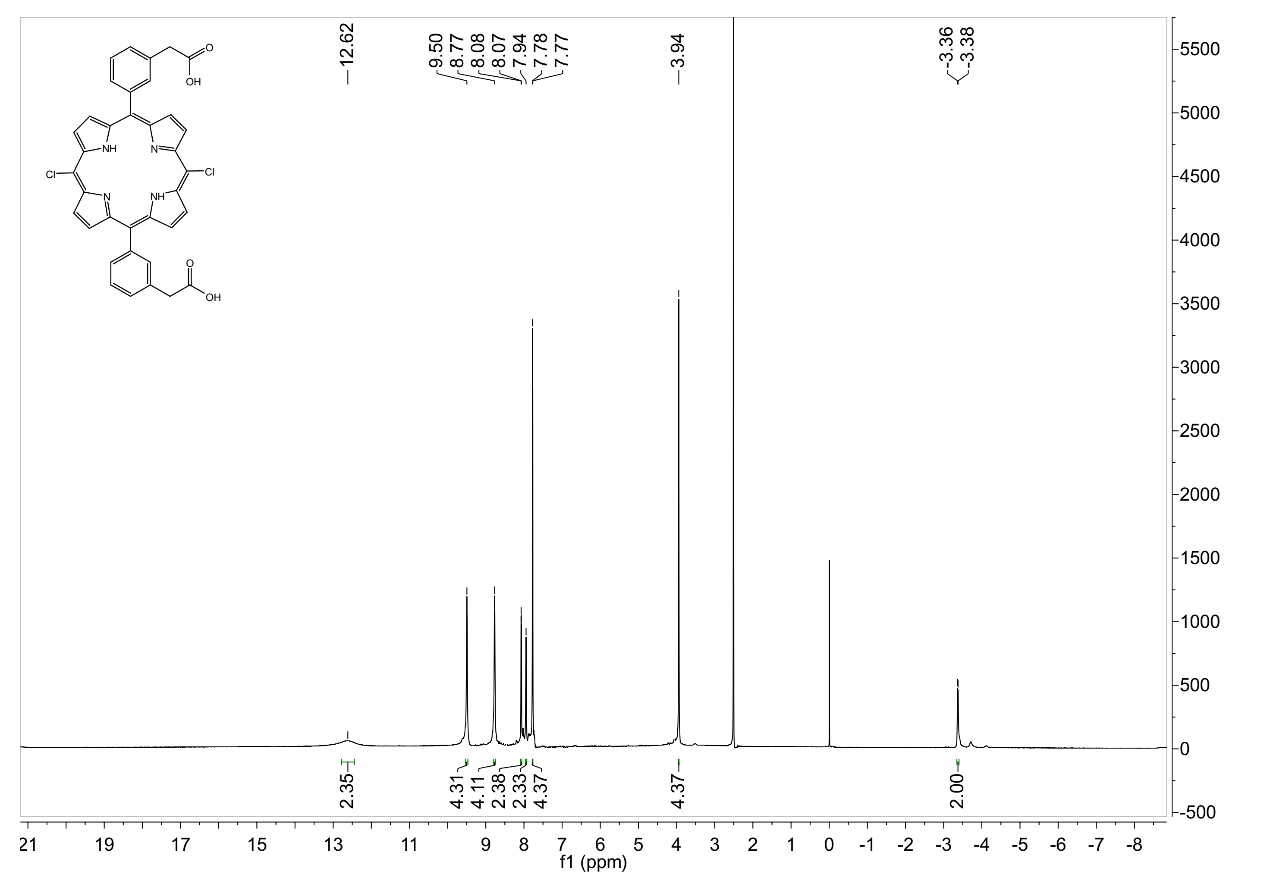


**Figure S16-1.** 1H NMR (DMSO-*d*6,600 MHz) of **I5**


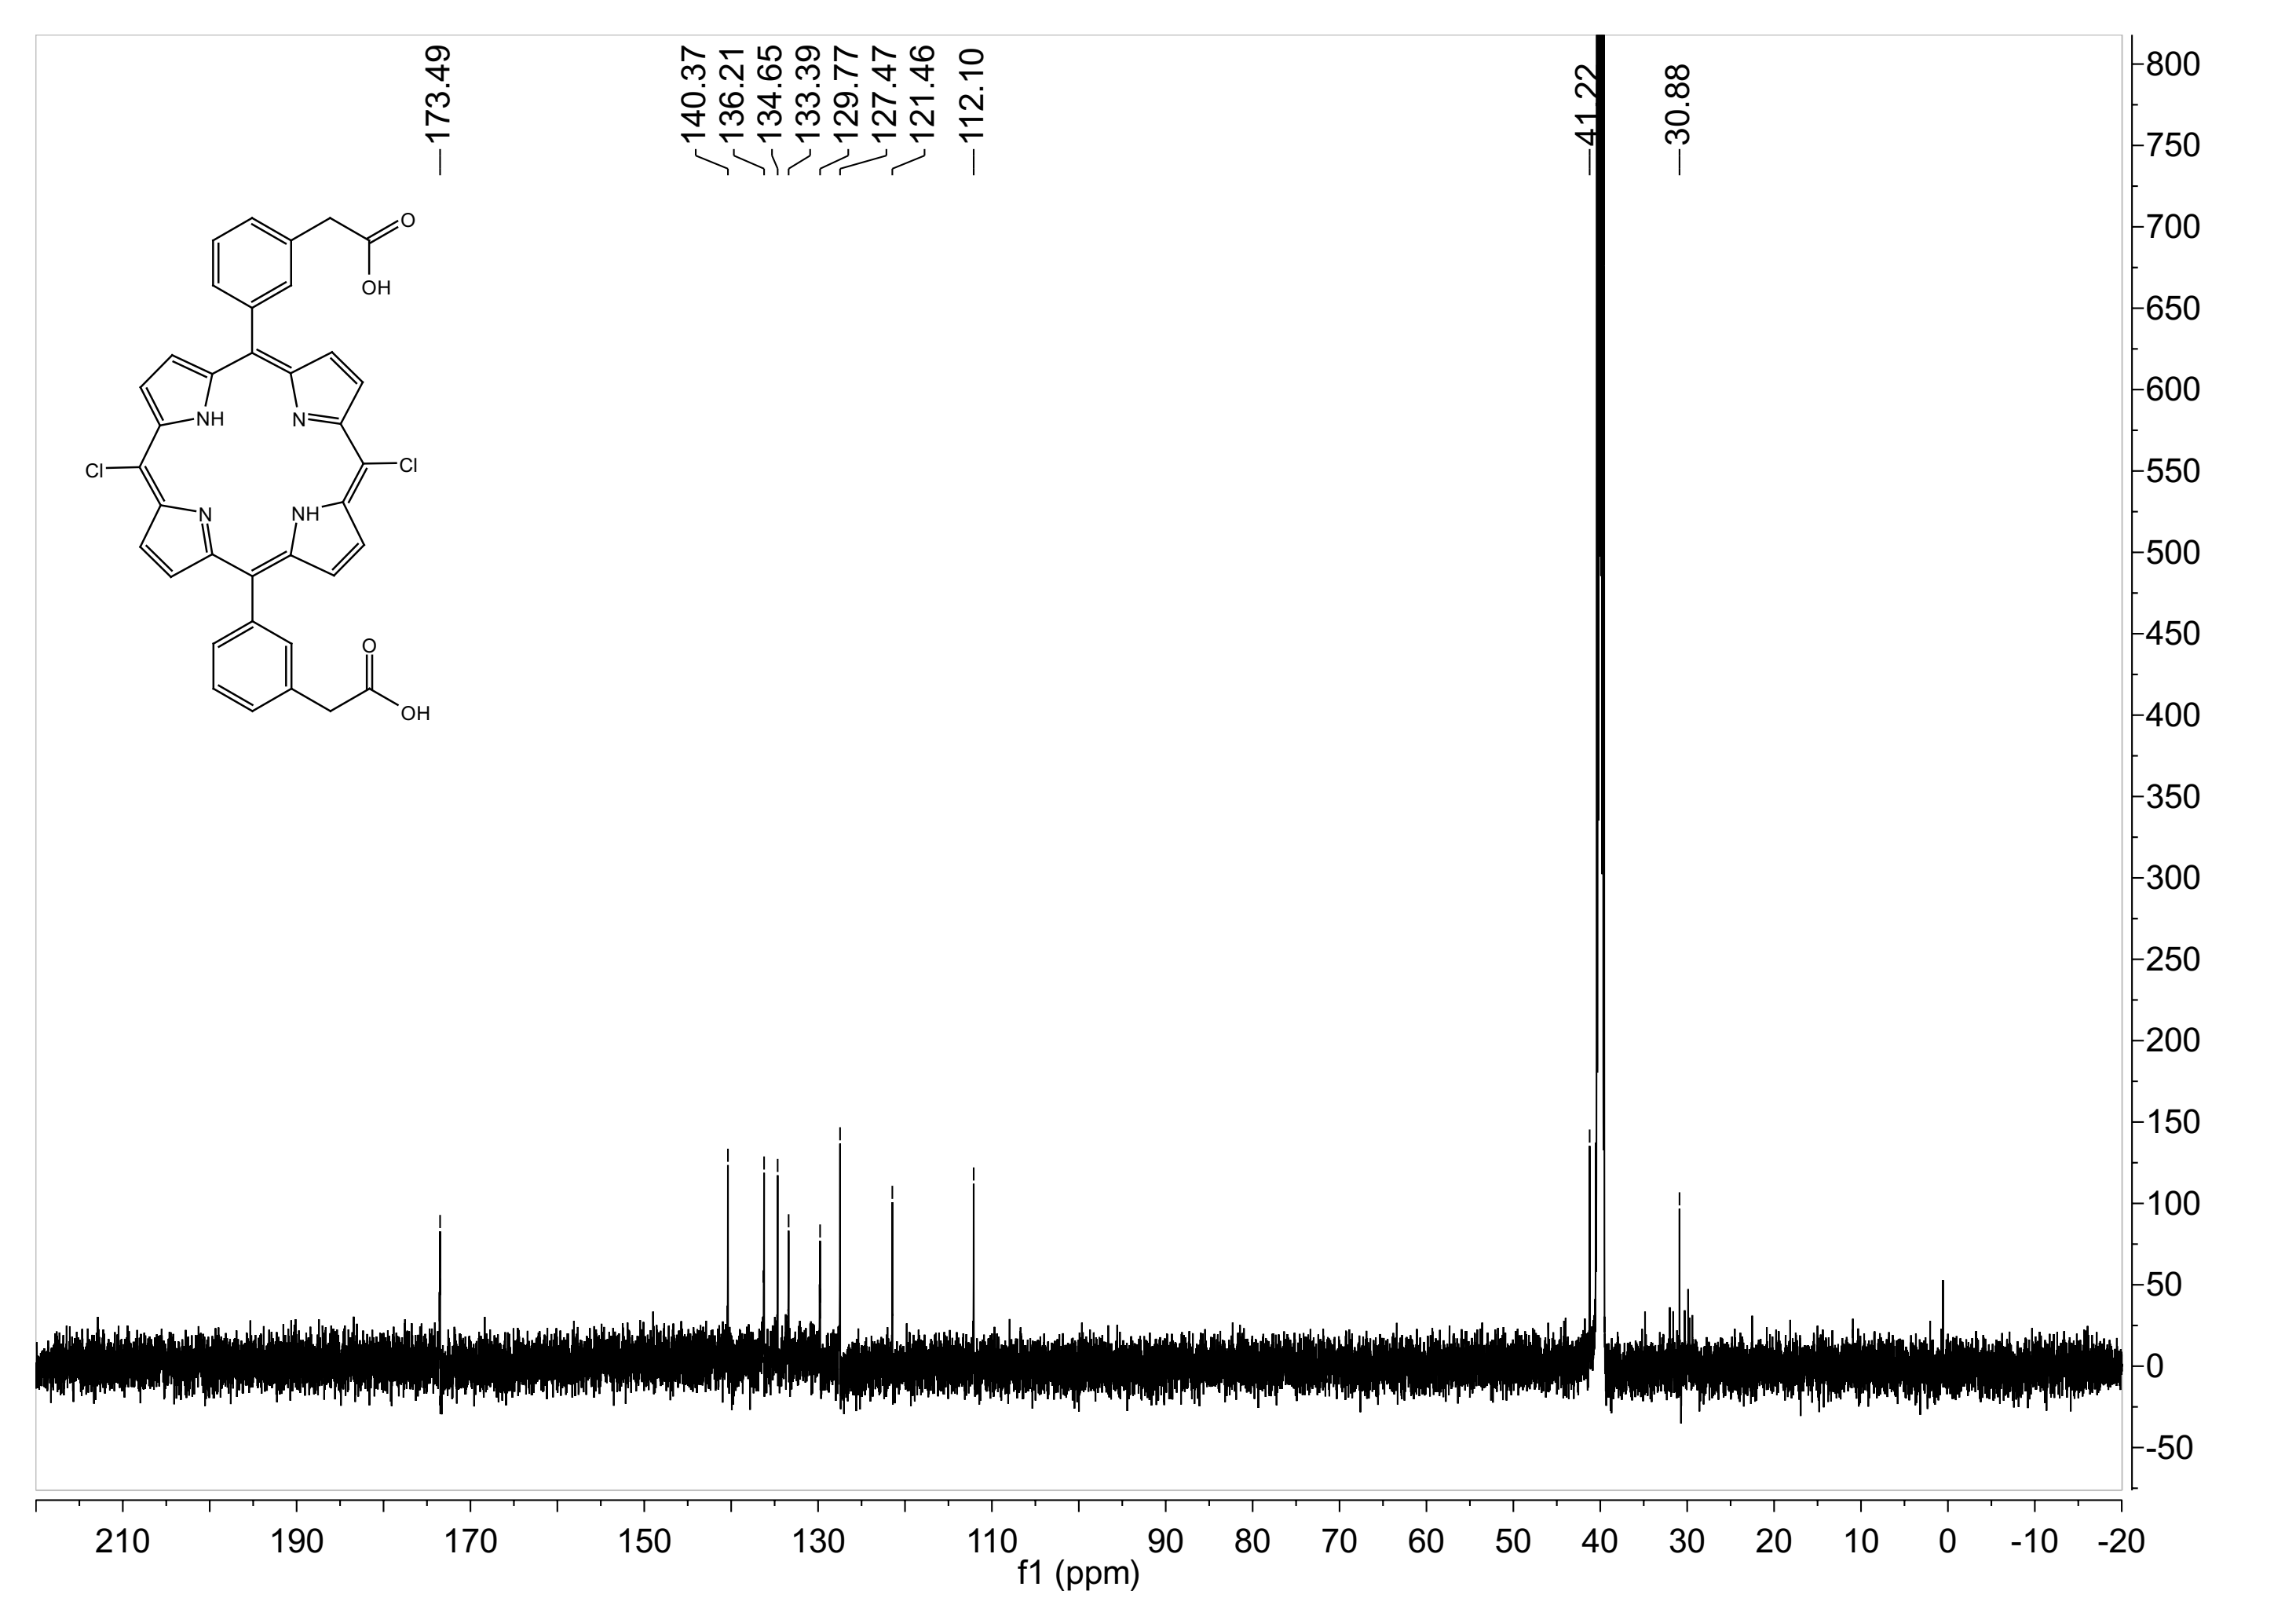


**Figure S16-2.** 13C NMR (DMSO-*d*6,151 MHz) of **I5**


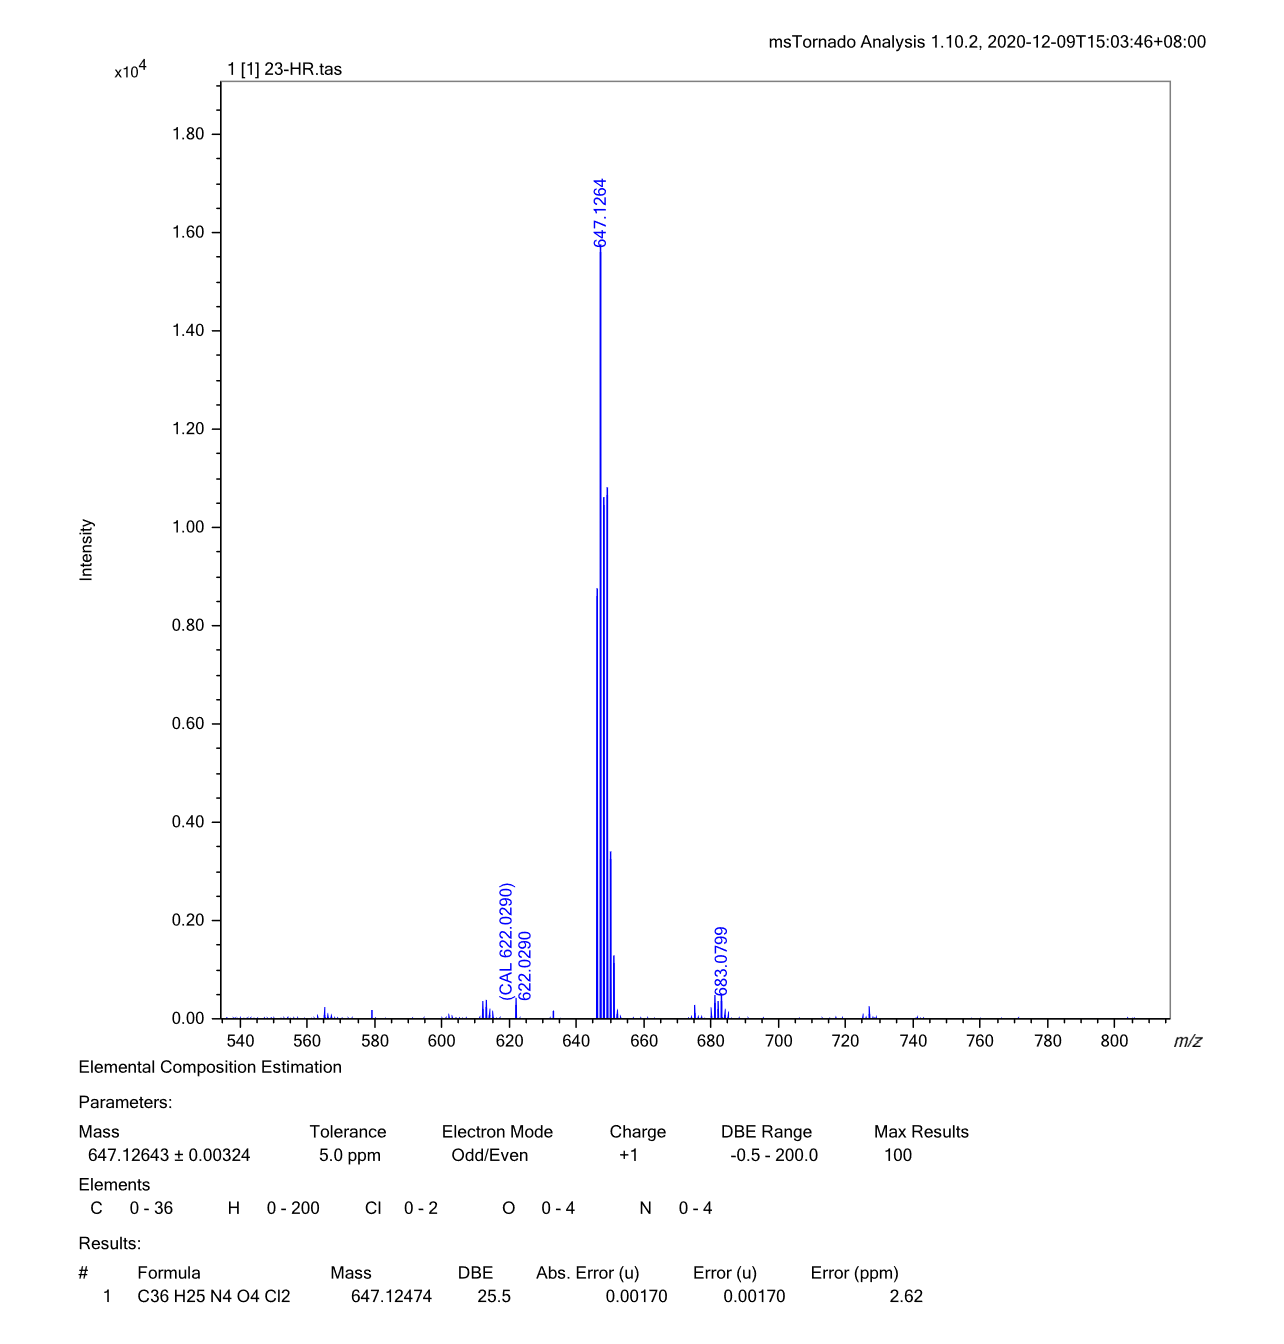


**Figure S16-3.** HRMS (MALDI-TOF) of **I5**


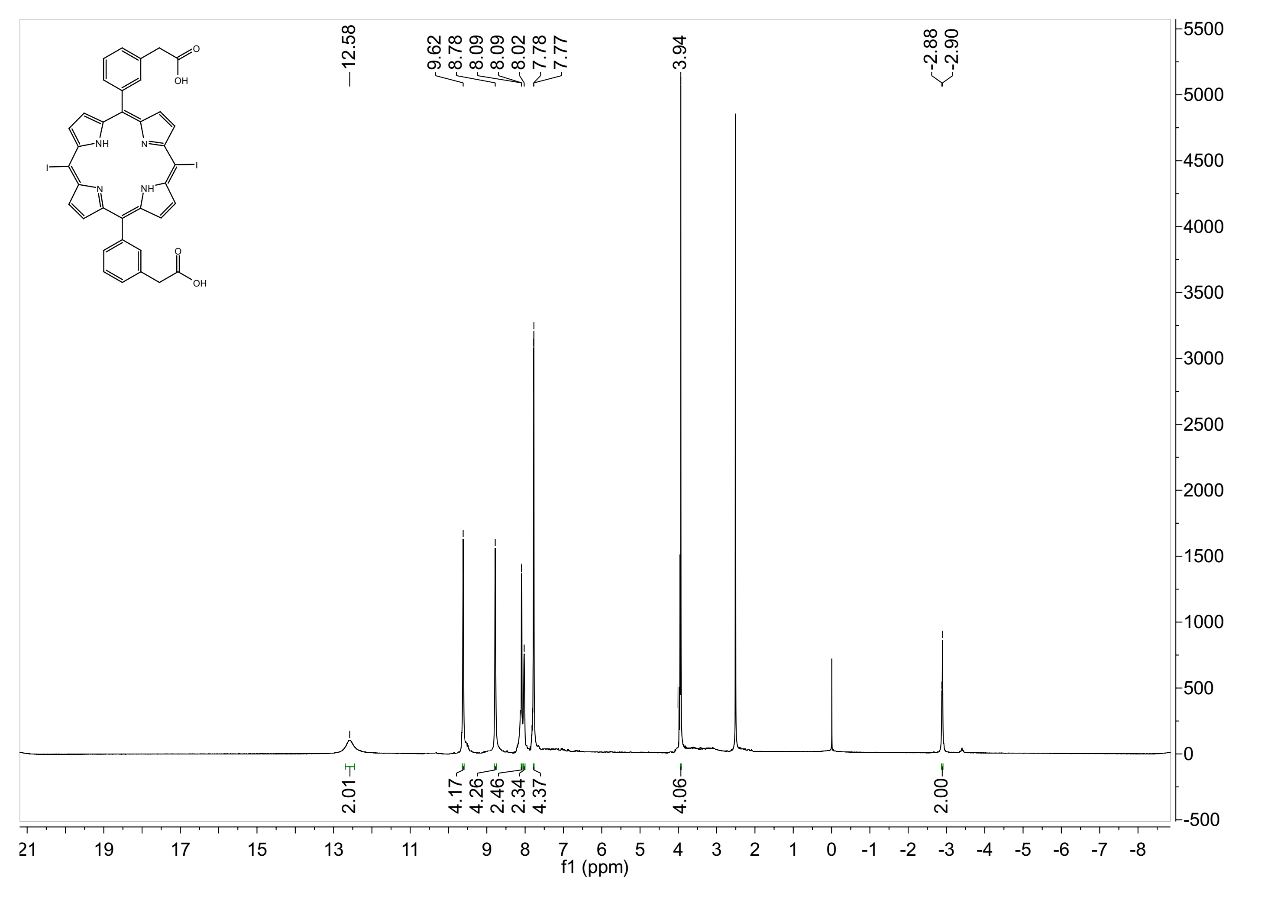


**Figure S17-1.** 1H NMR (DMSO-*d*6,600 MHz) of **I6**


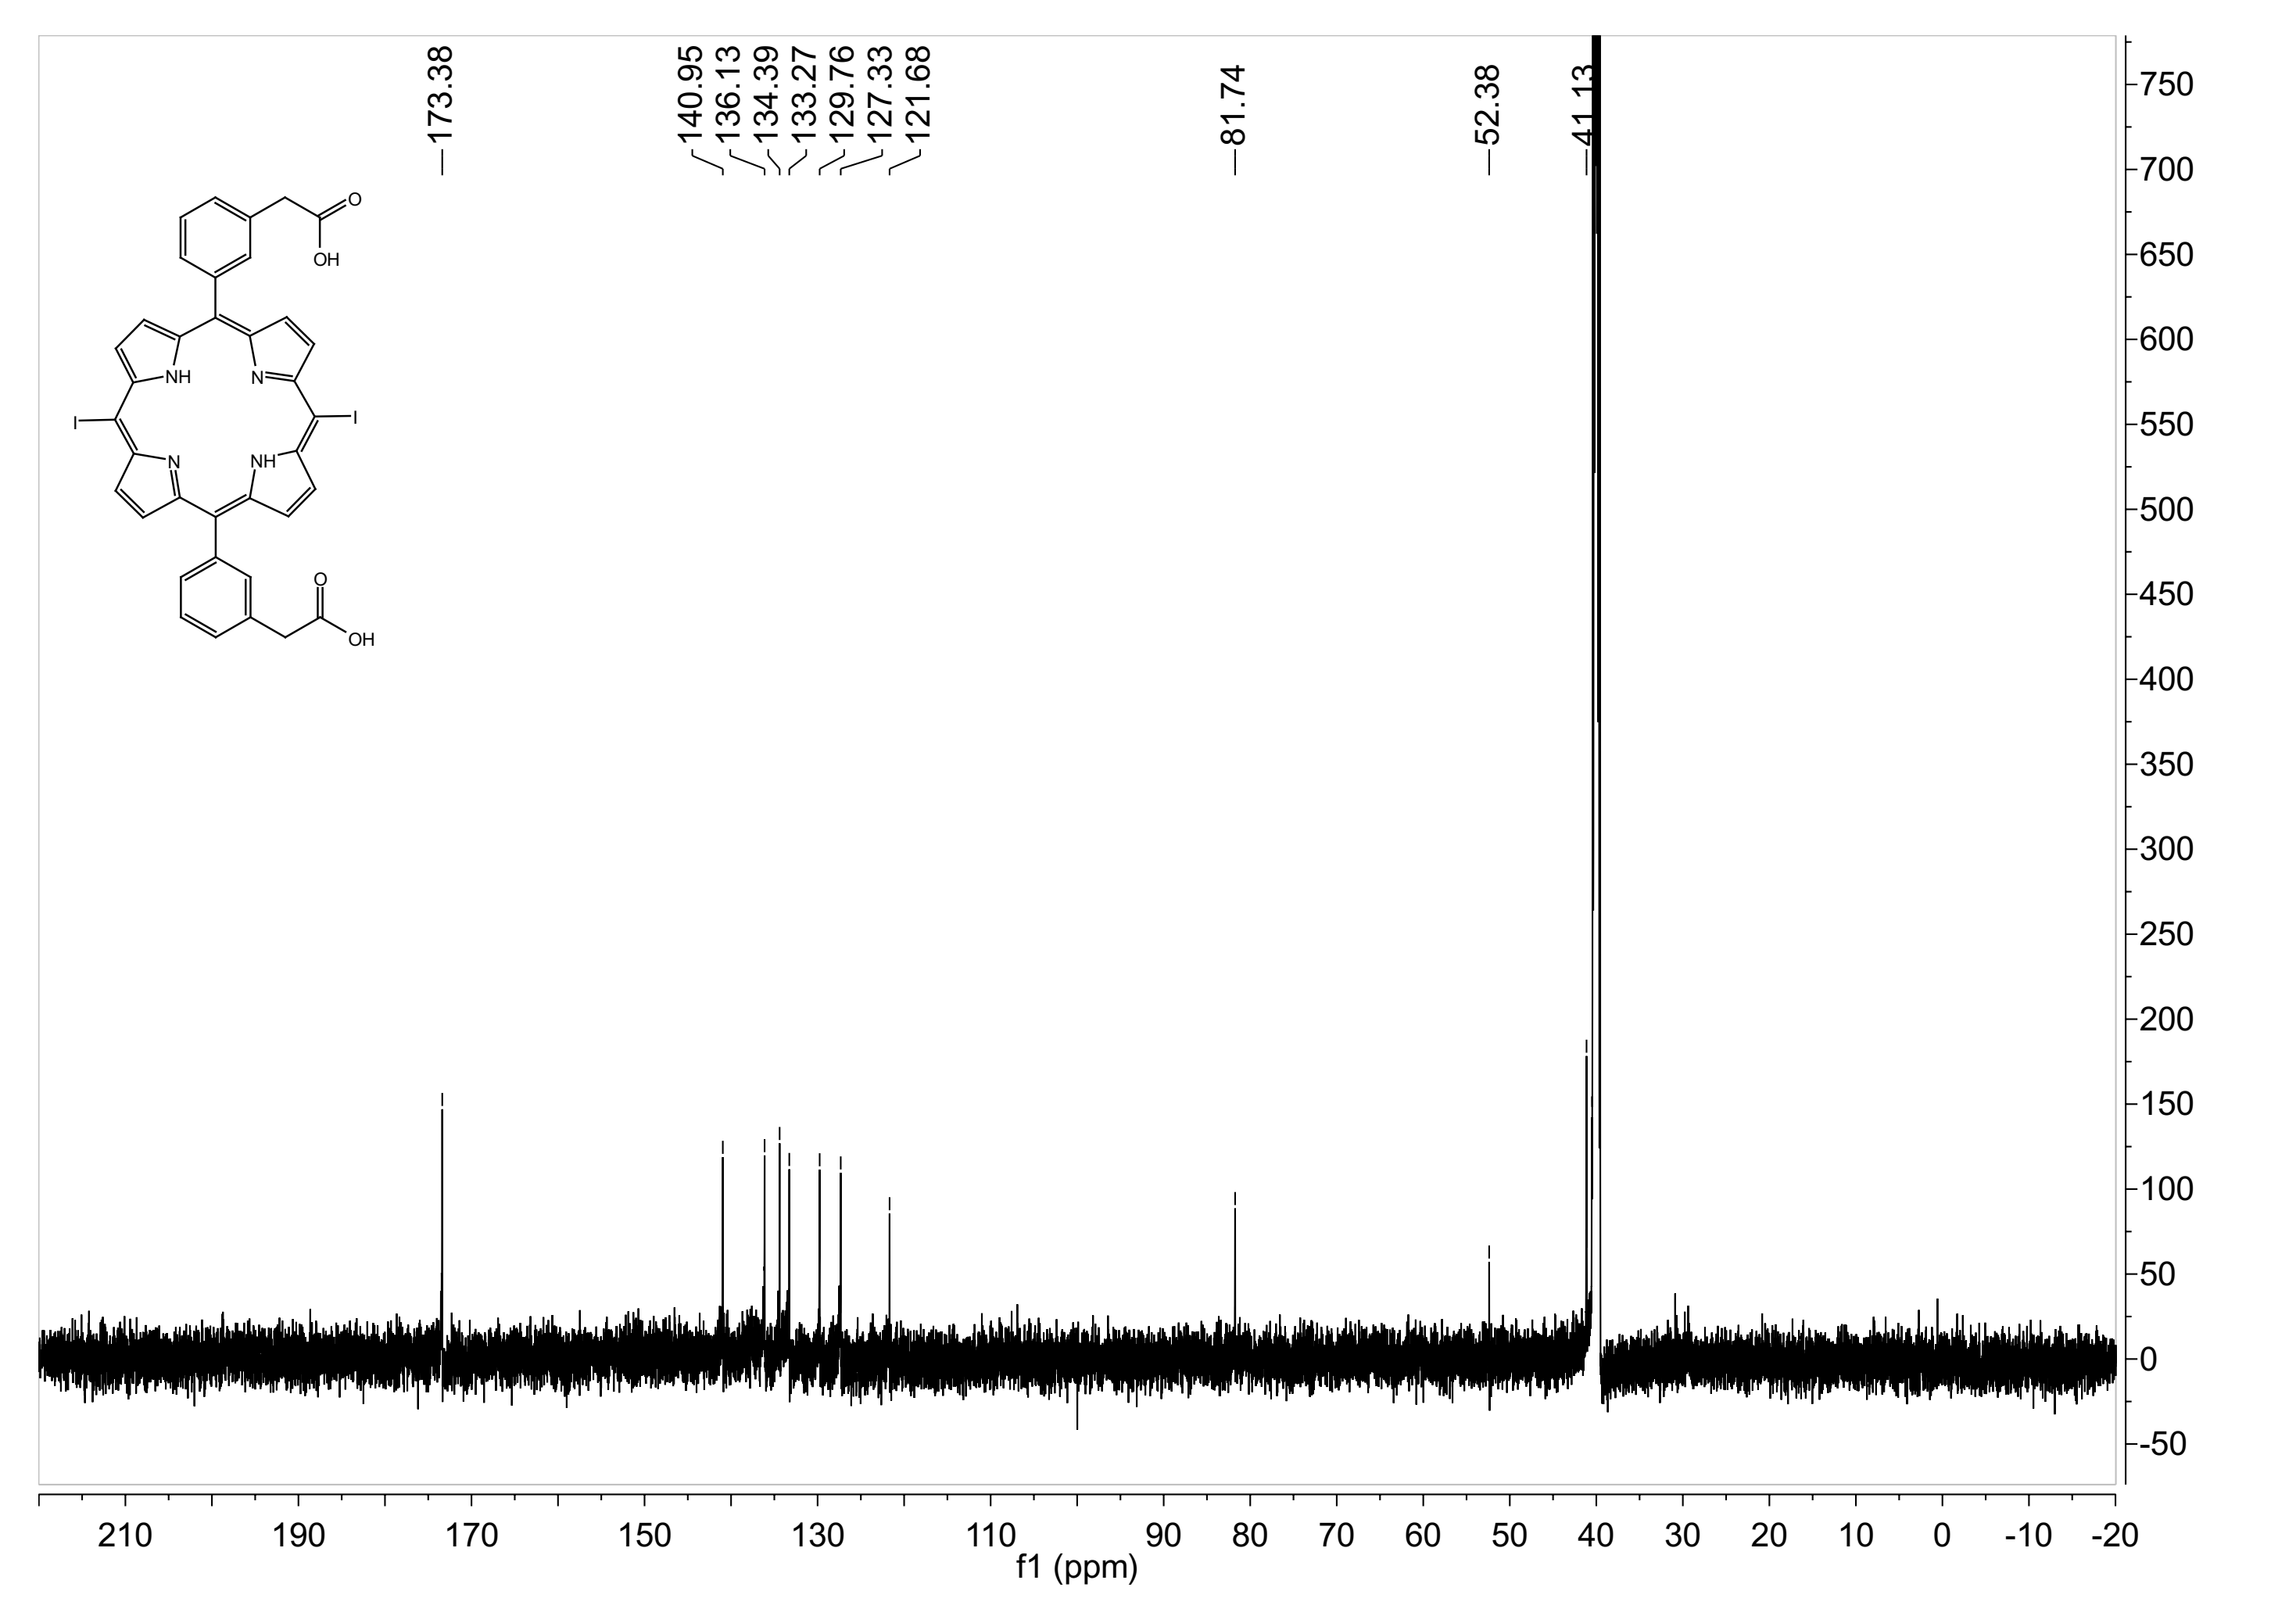


**Figure S17-2.** 13C NMR (DMSO-*d*6,151 MHz) of **I6**


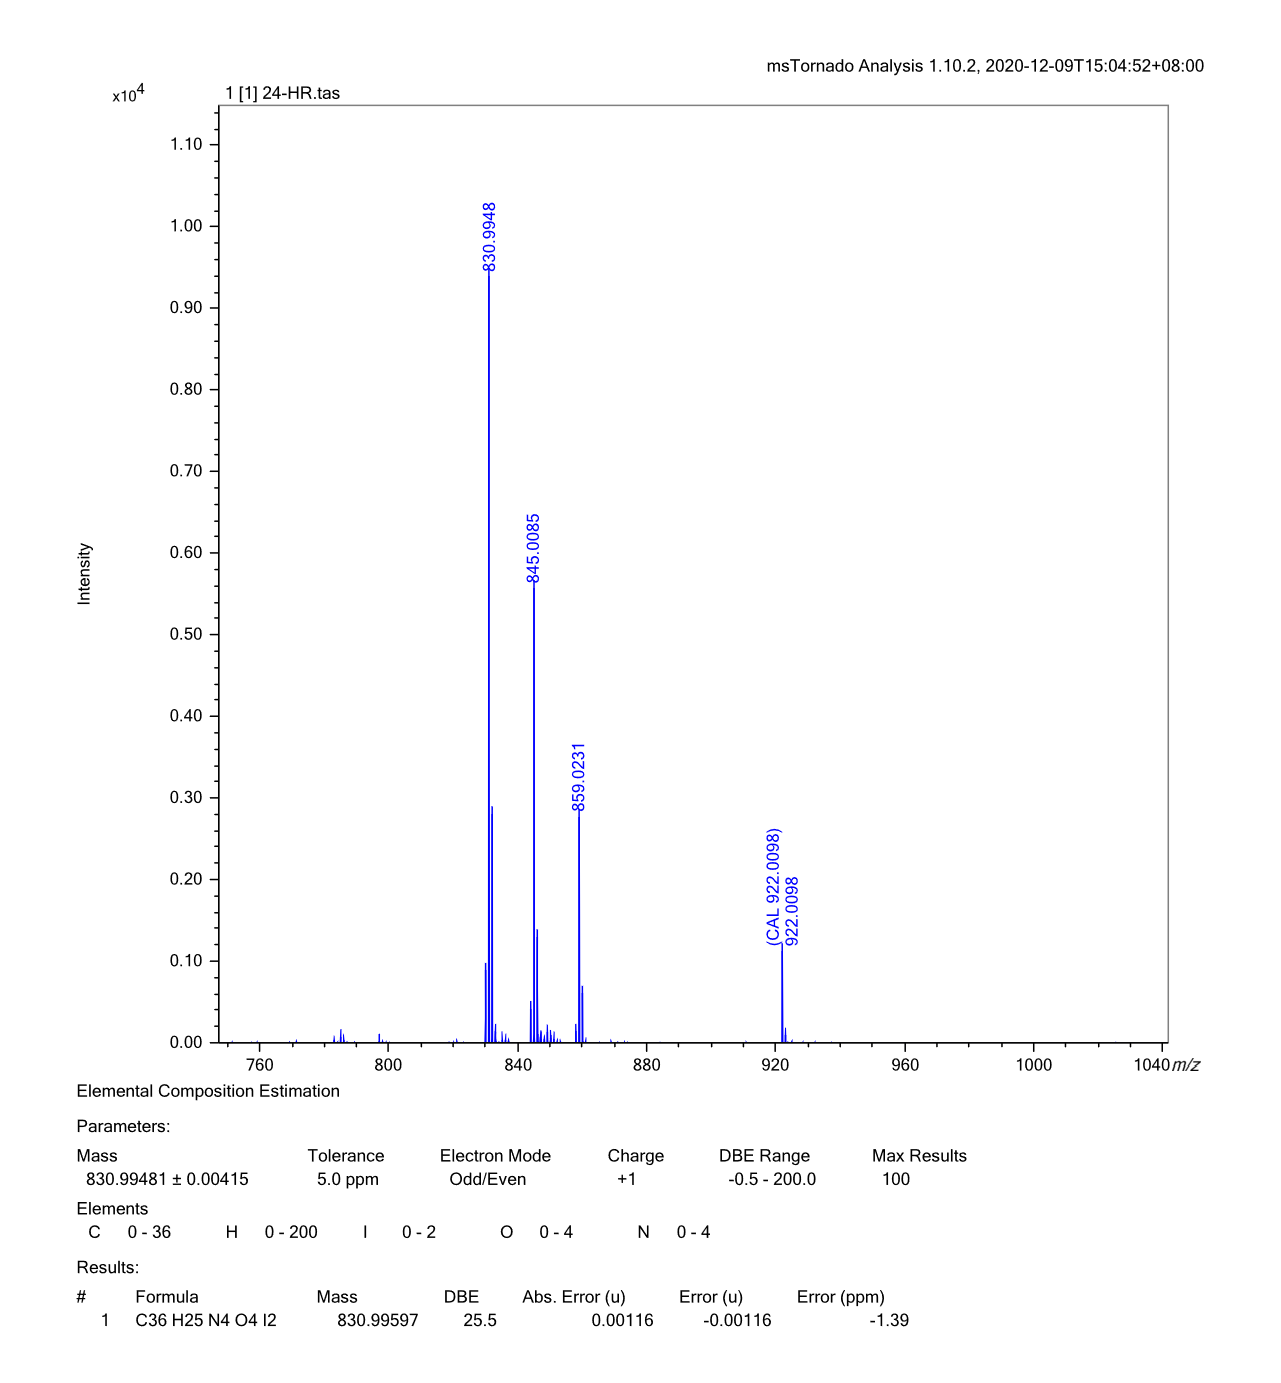


**Figure S17-3.** HRMS (MALDI-TOF) of **I6**


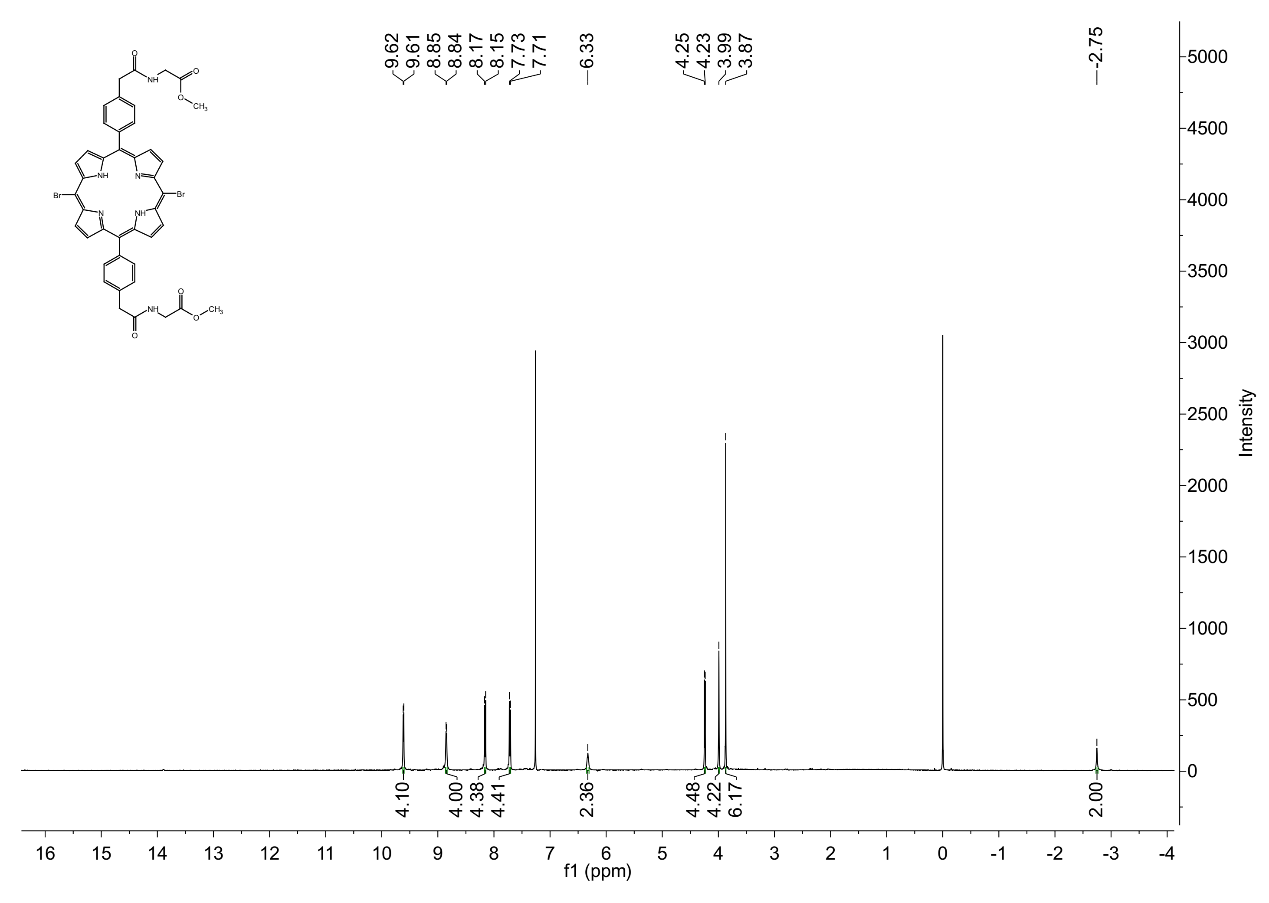


**Figure S18.** 1H NMR (CDCl3,400 MHz) of **4a**


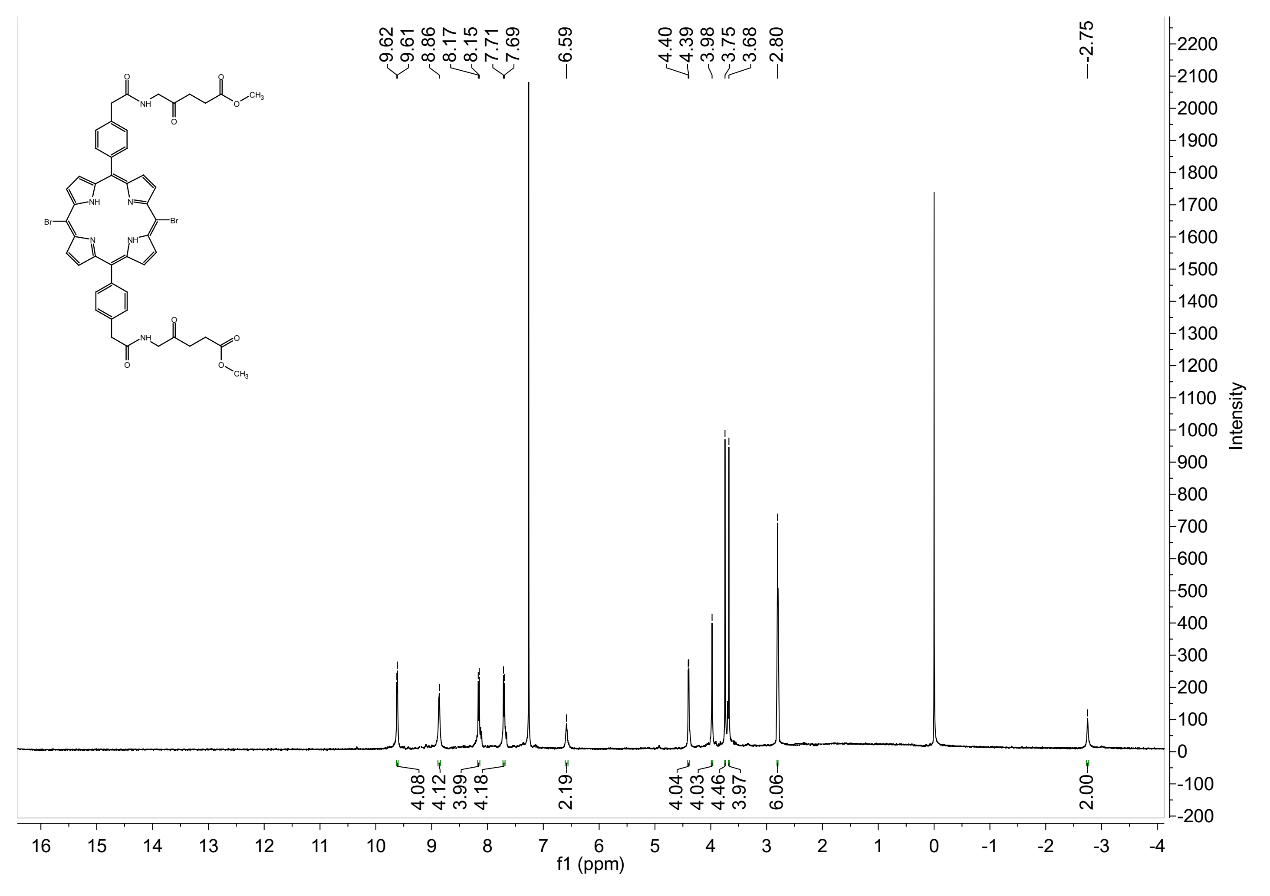


**Figure S19.** 1H NMR (CDCl3,400 MHz) of **4b**


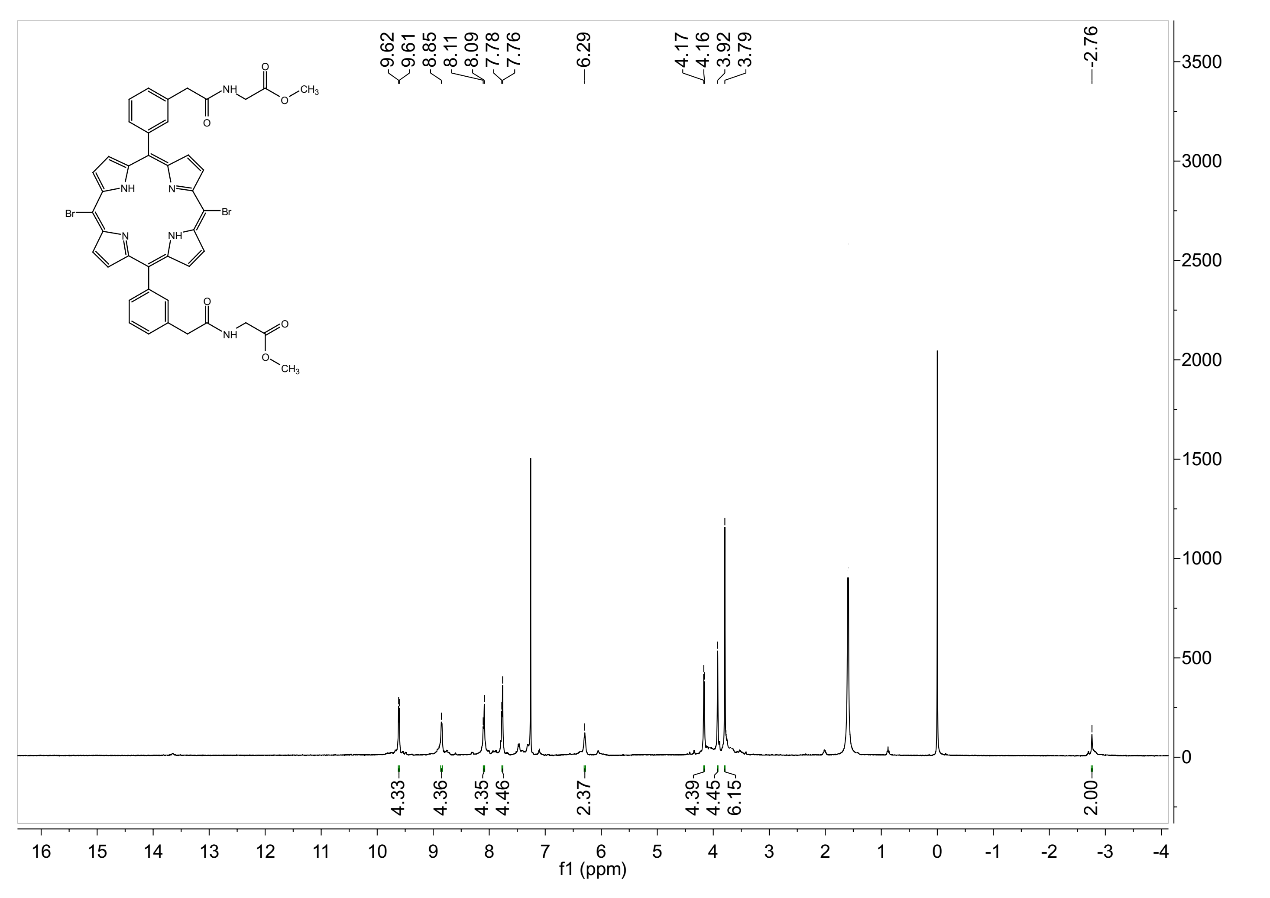


**Figure S20.** 1H NMR (CDCl3,400 MHz) of **4c**


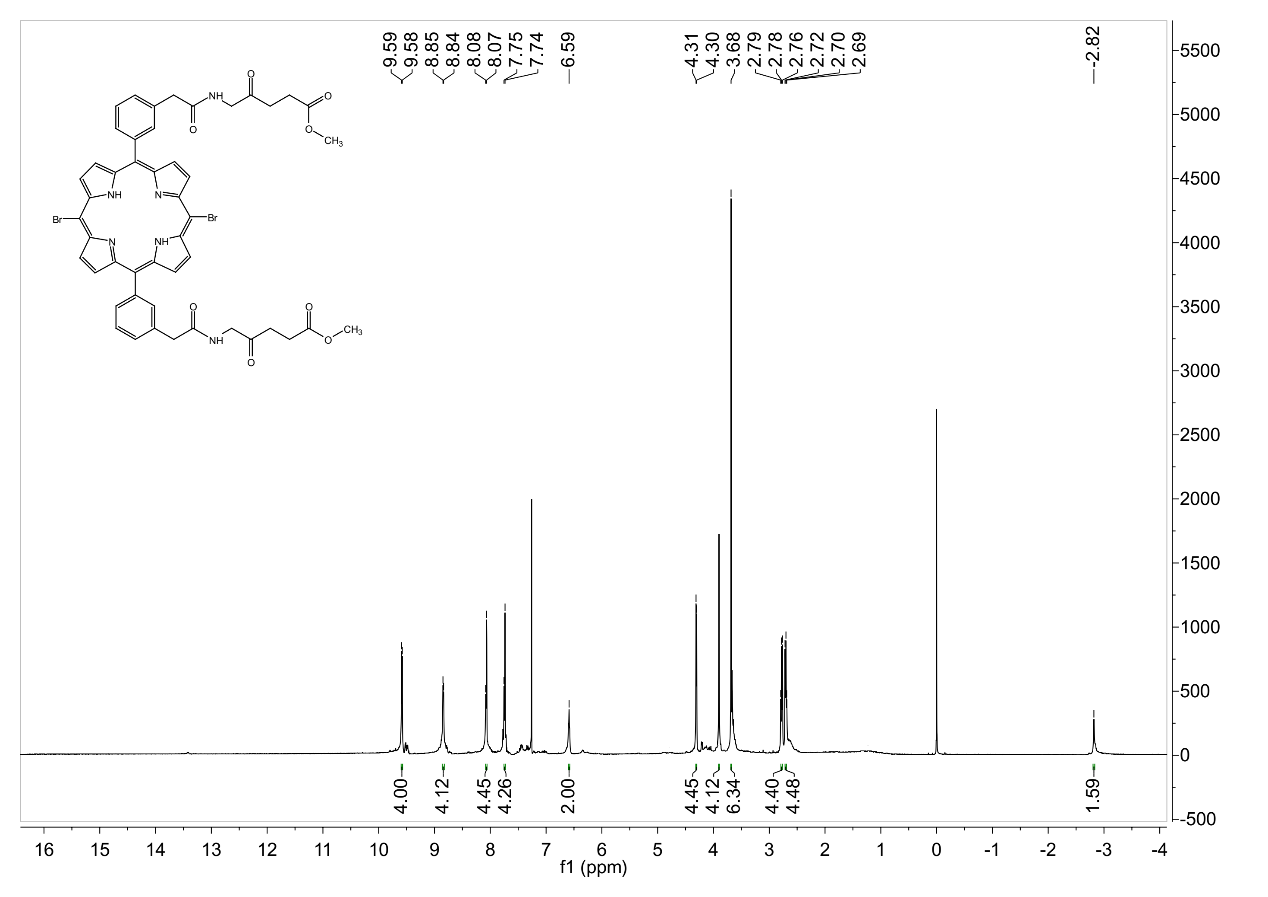


**Figure S21.** 1H NMR (CDCl3,400 MHz) of **4d**


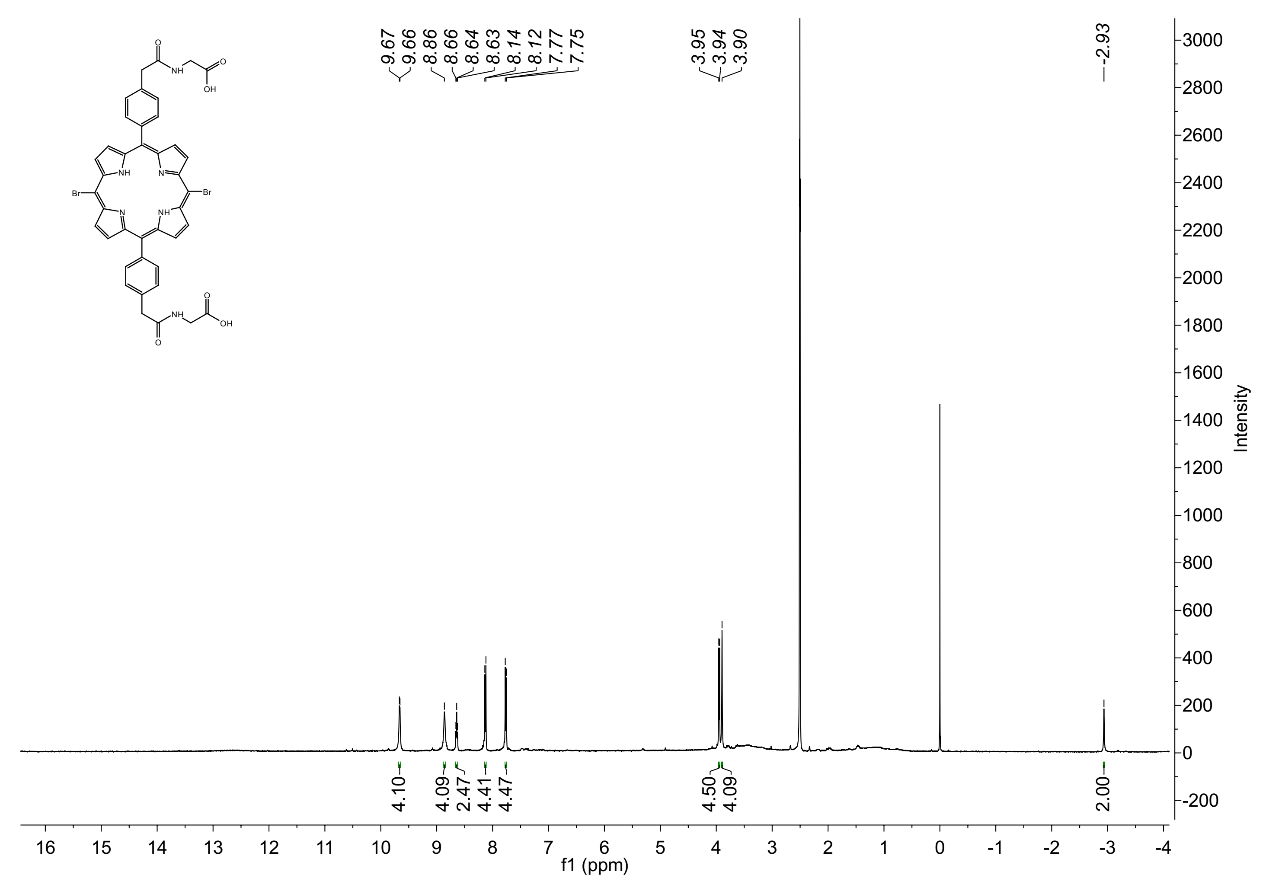


**Figure S22-1.** 1H NMR (DMSO-*d*6,400 MHz) of **II1**


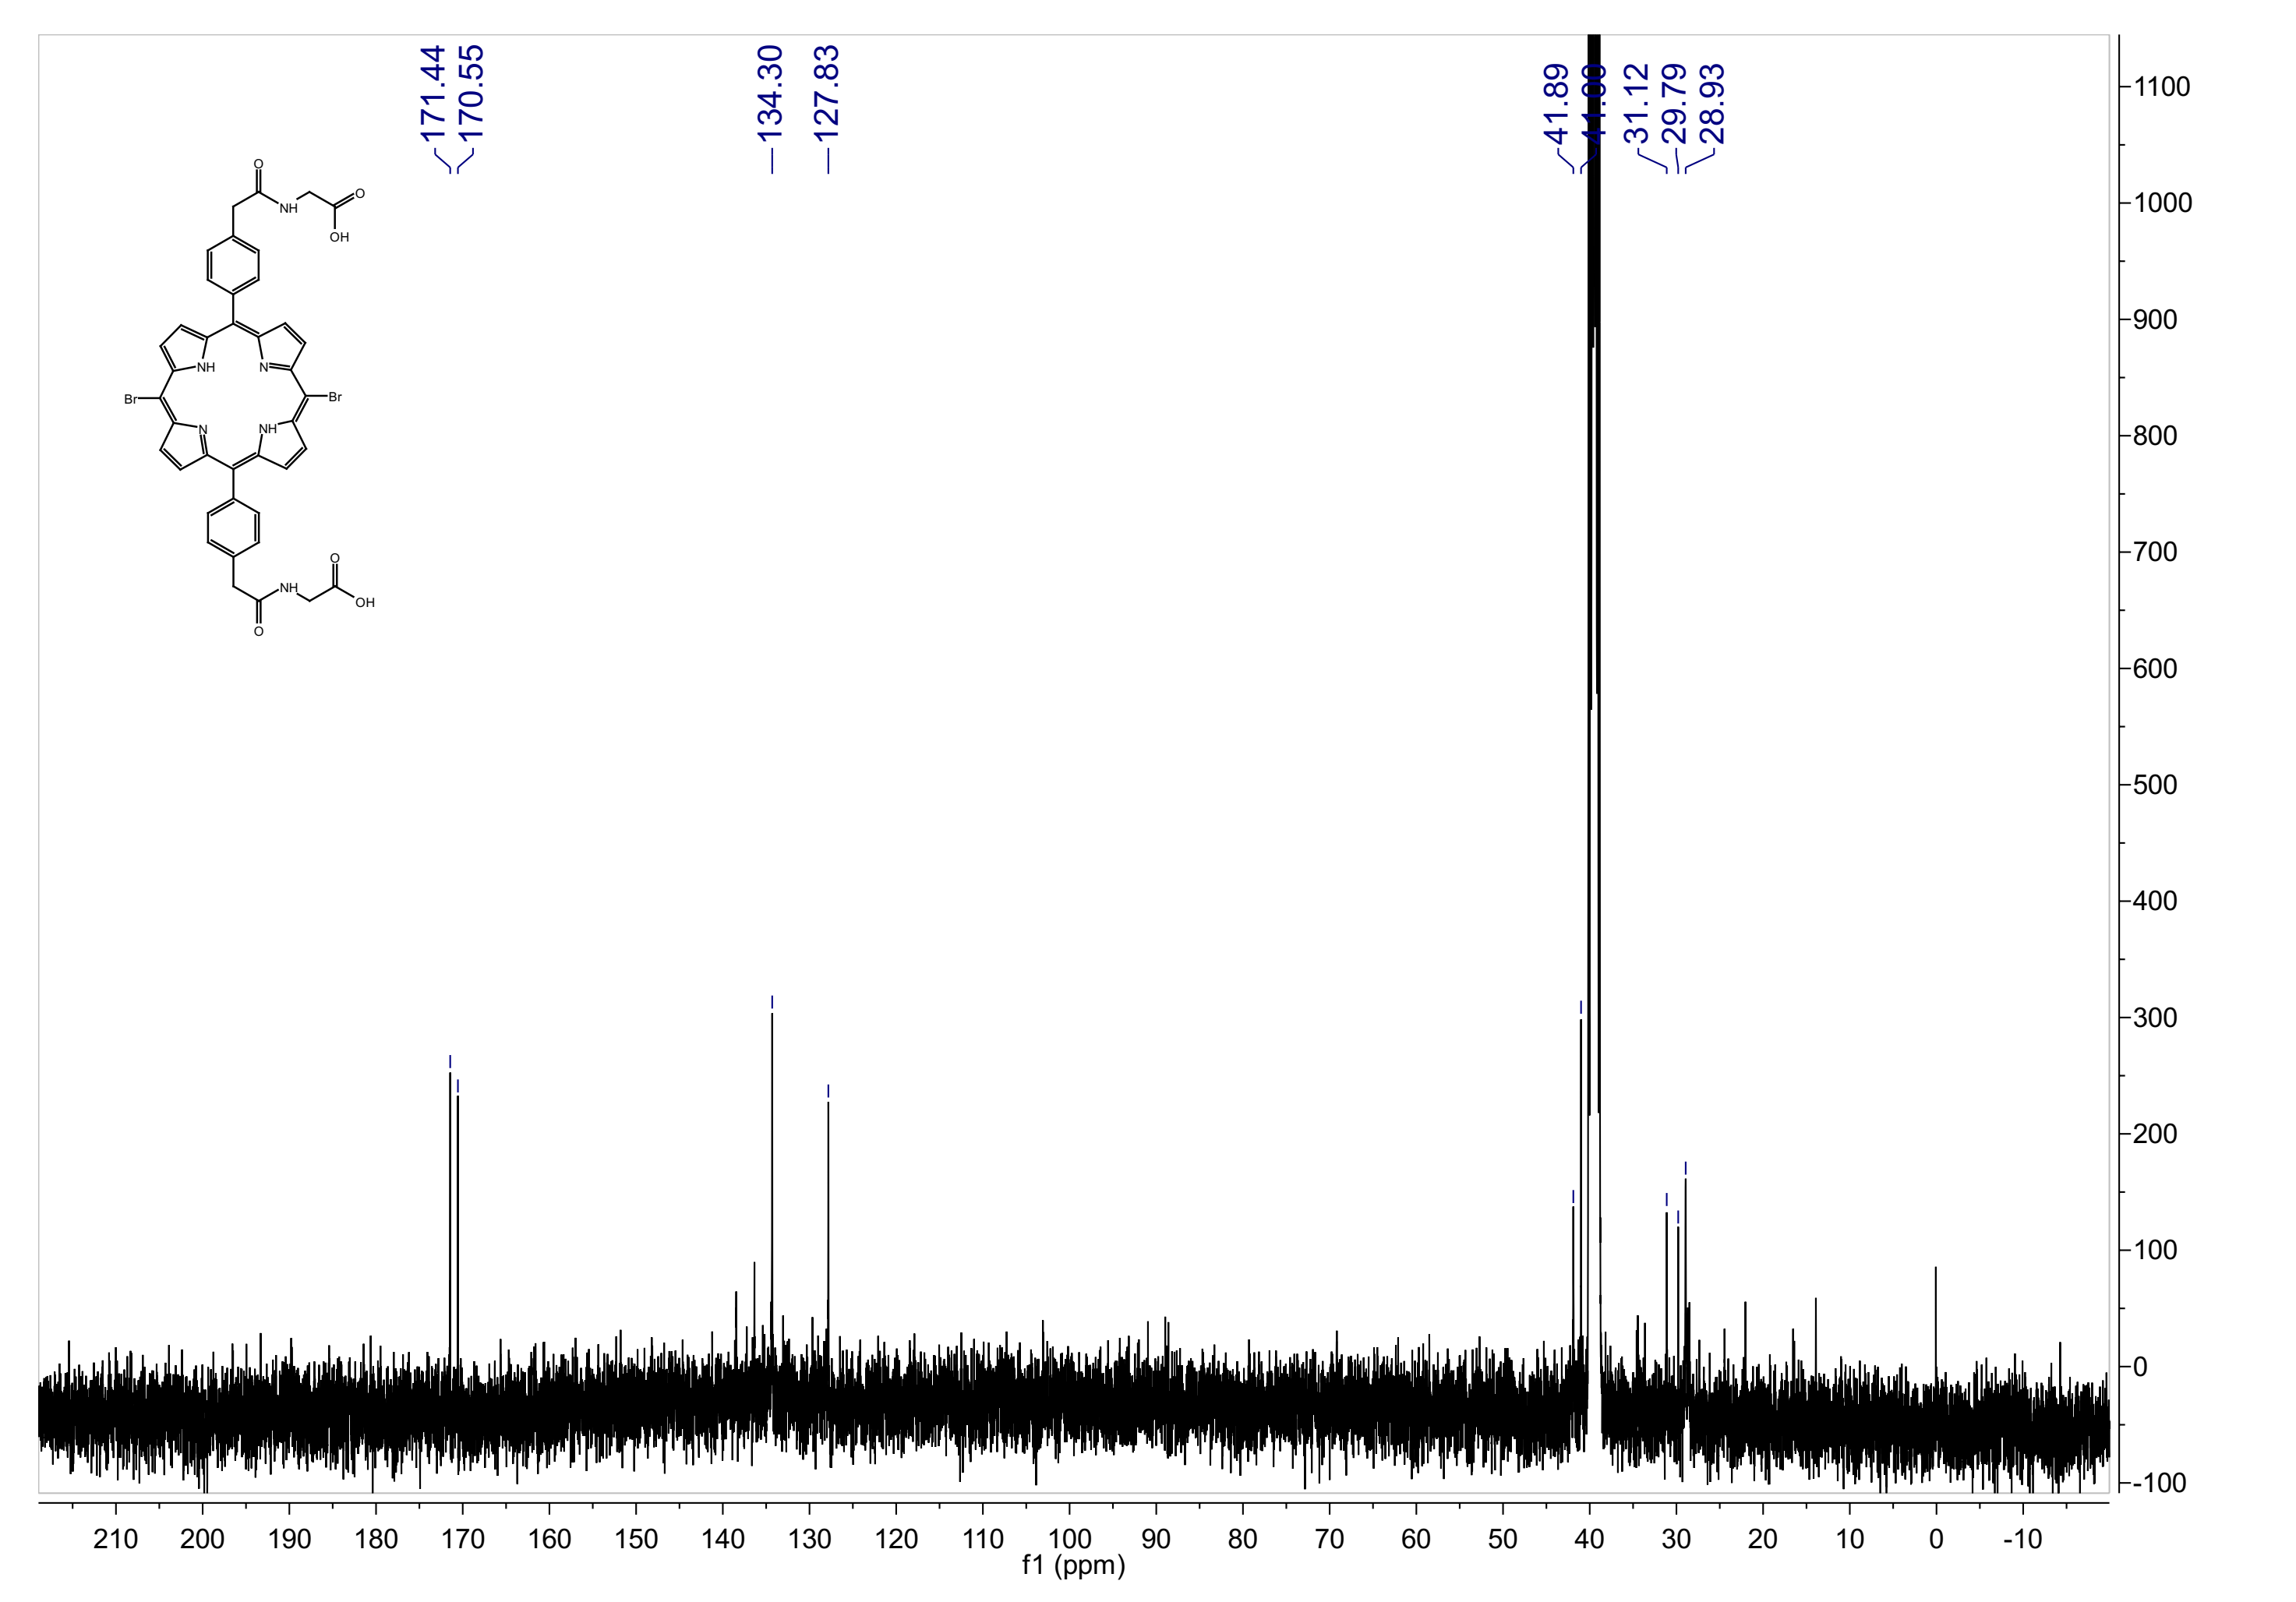


**Figure S22-2.** 13C NMR (DMSO-*d*6,101 MHz) of **II1**


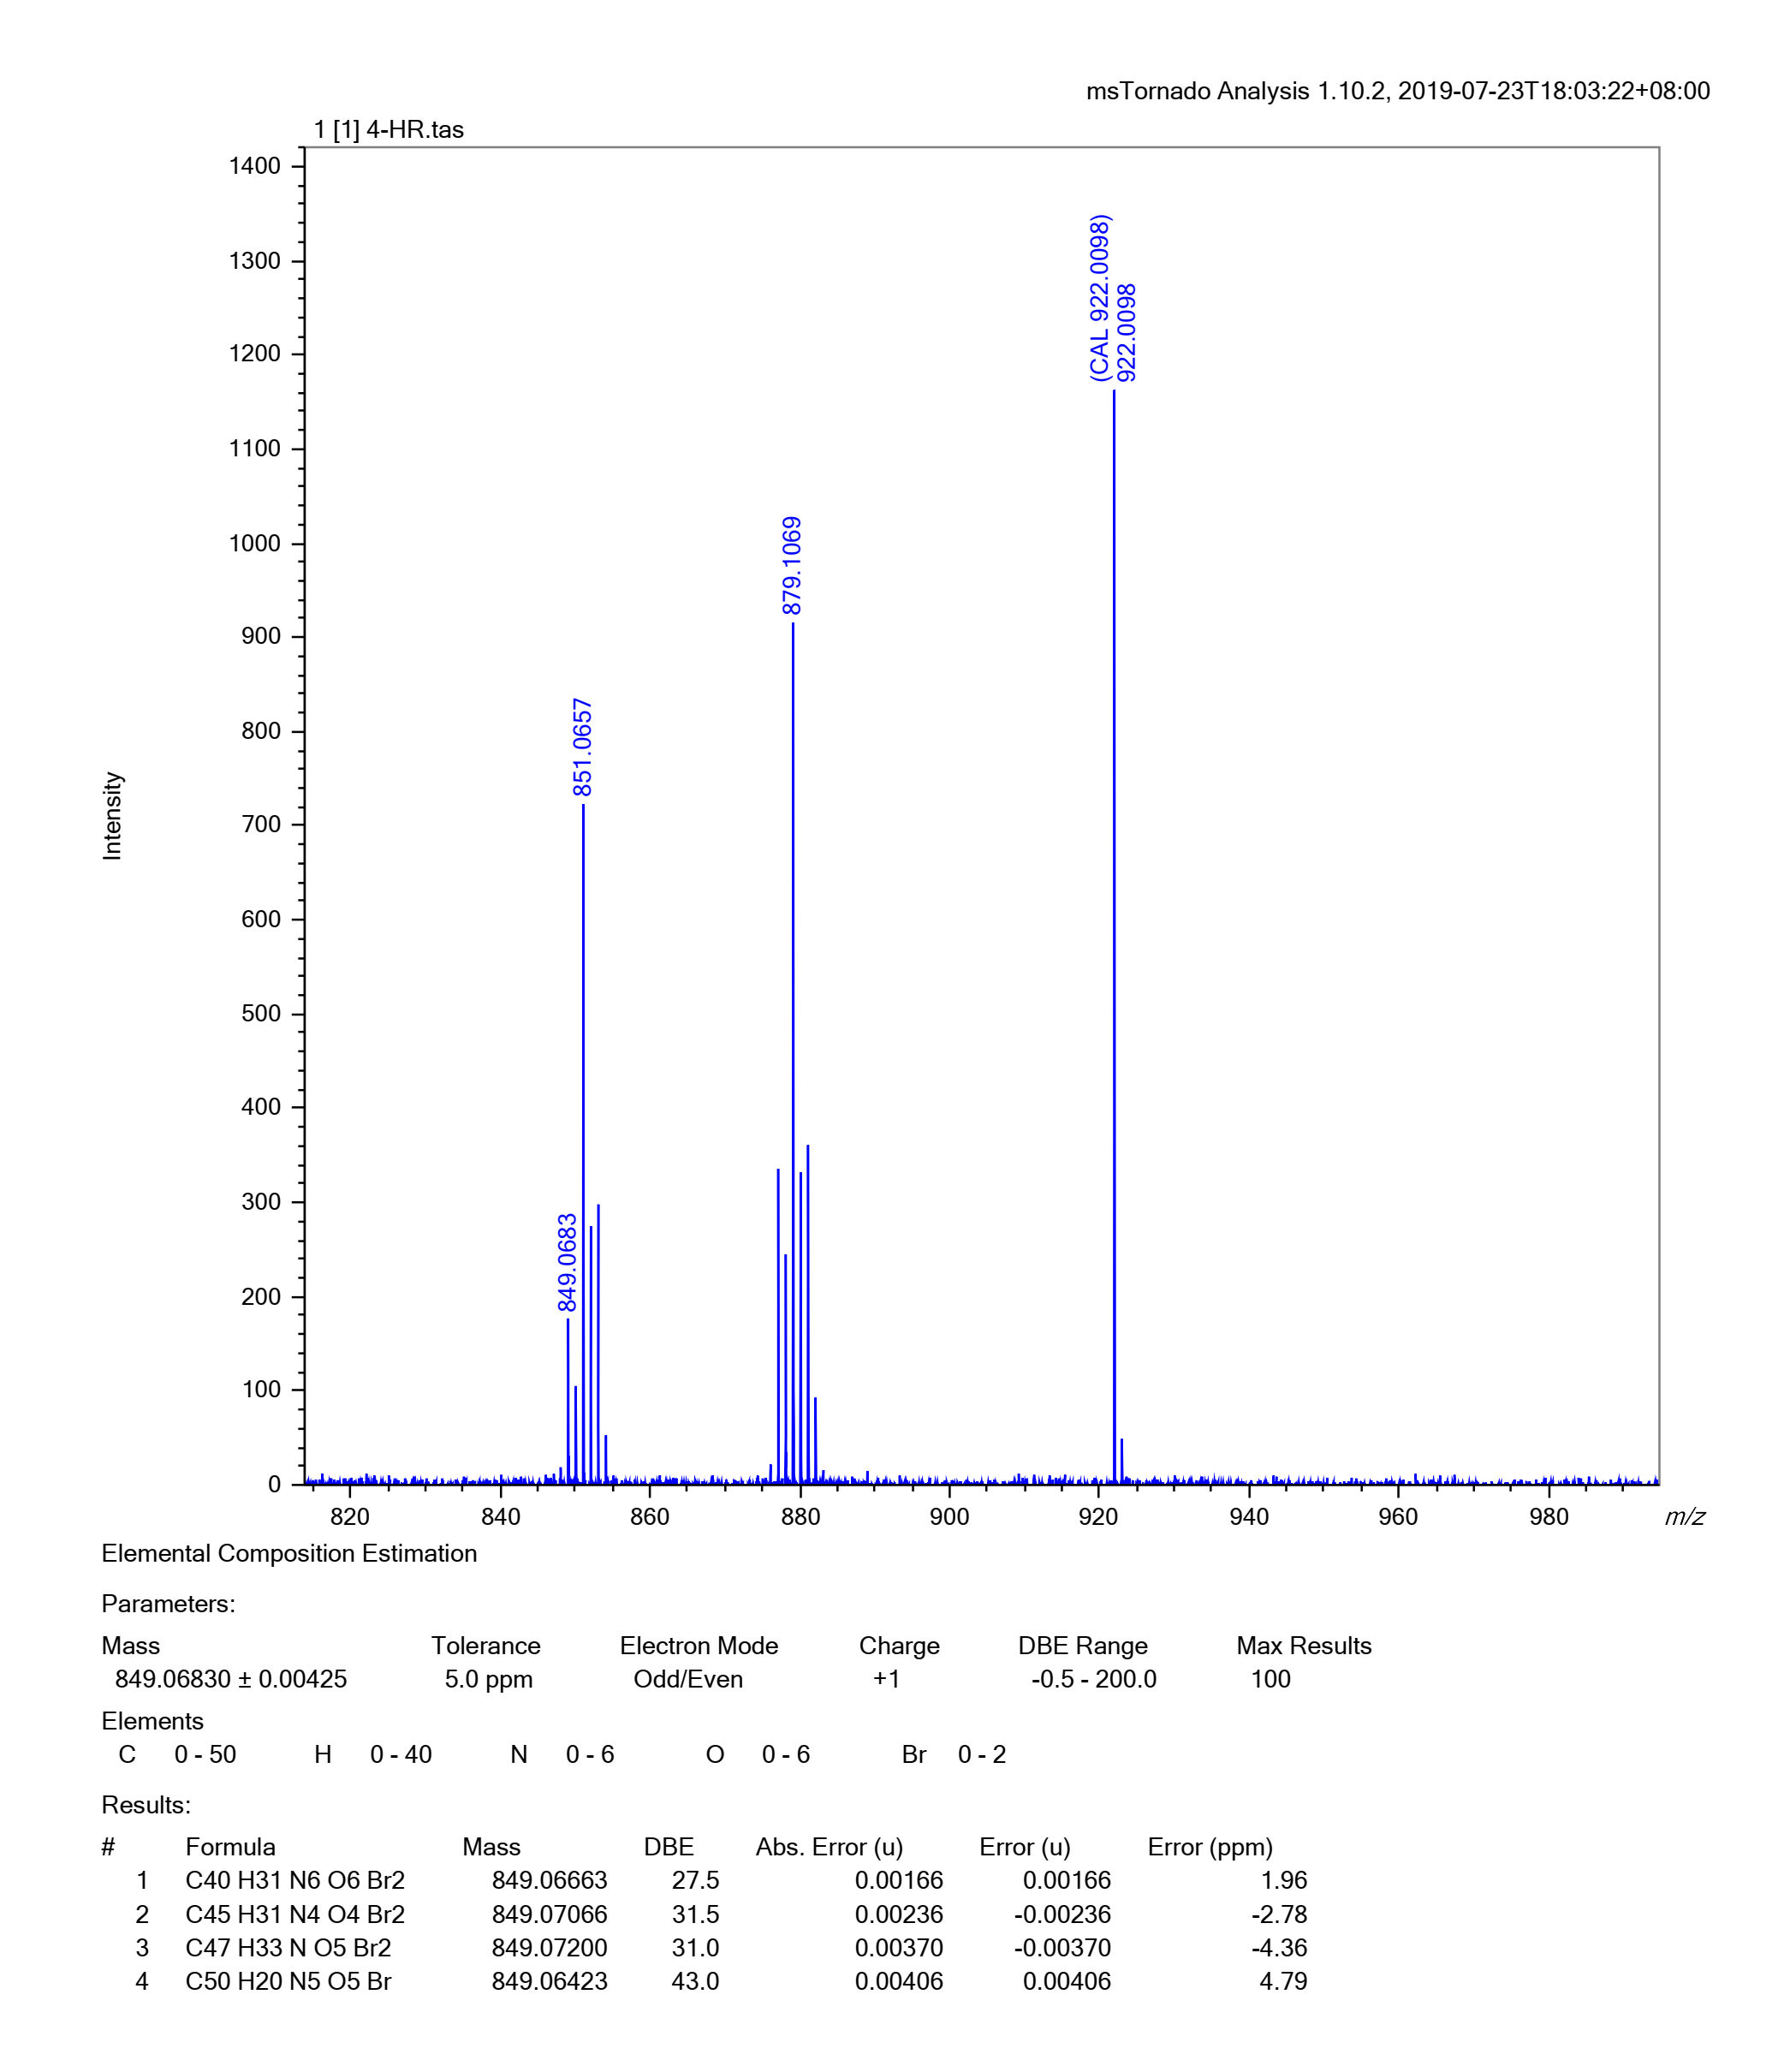


**Figure S22-3.** HRMS (MALDI-TOF) of **II1**


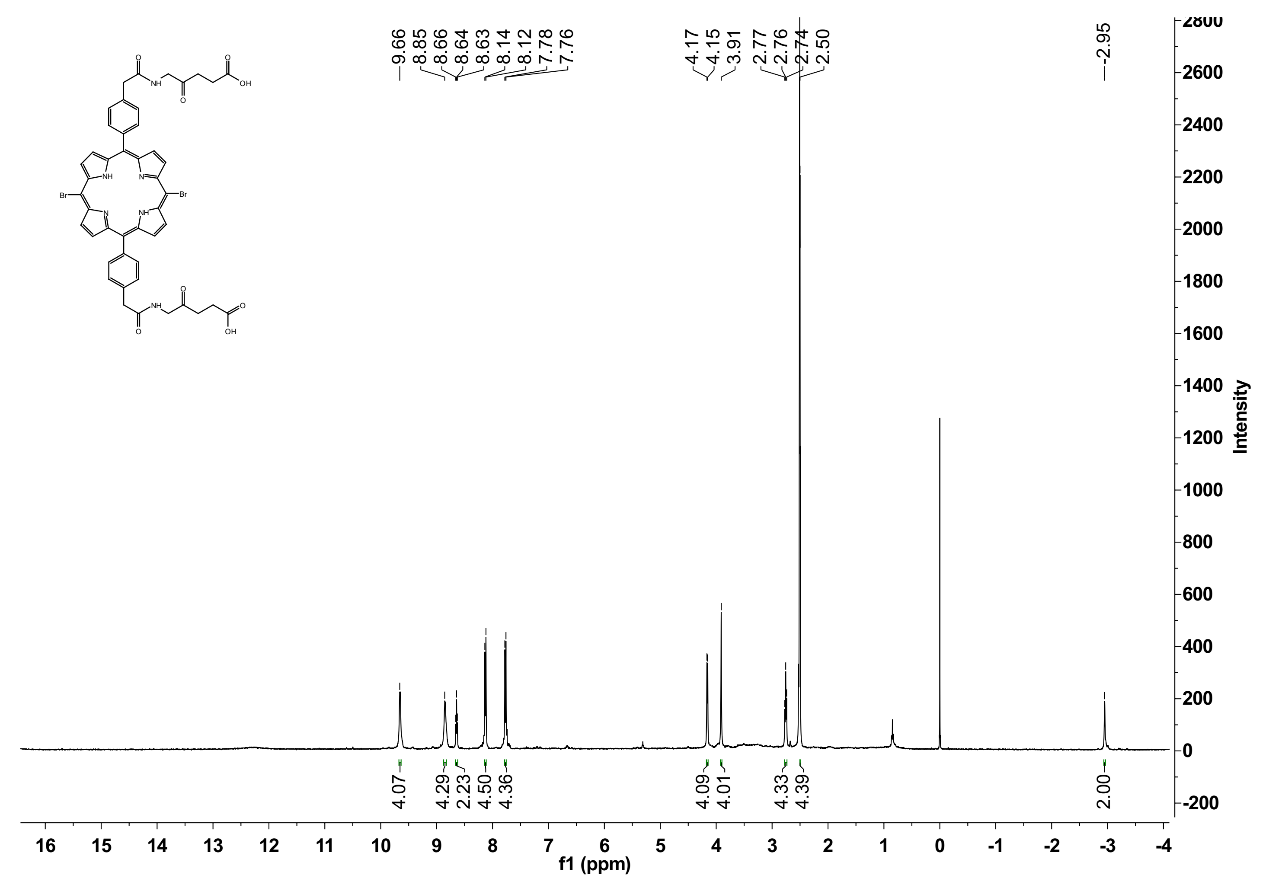


**Figure S23-1.** 1H NMR (DMSO-*d*6,400 MHz) of **II2**


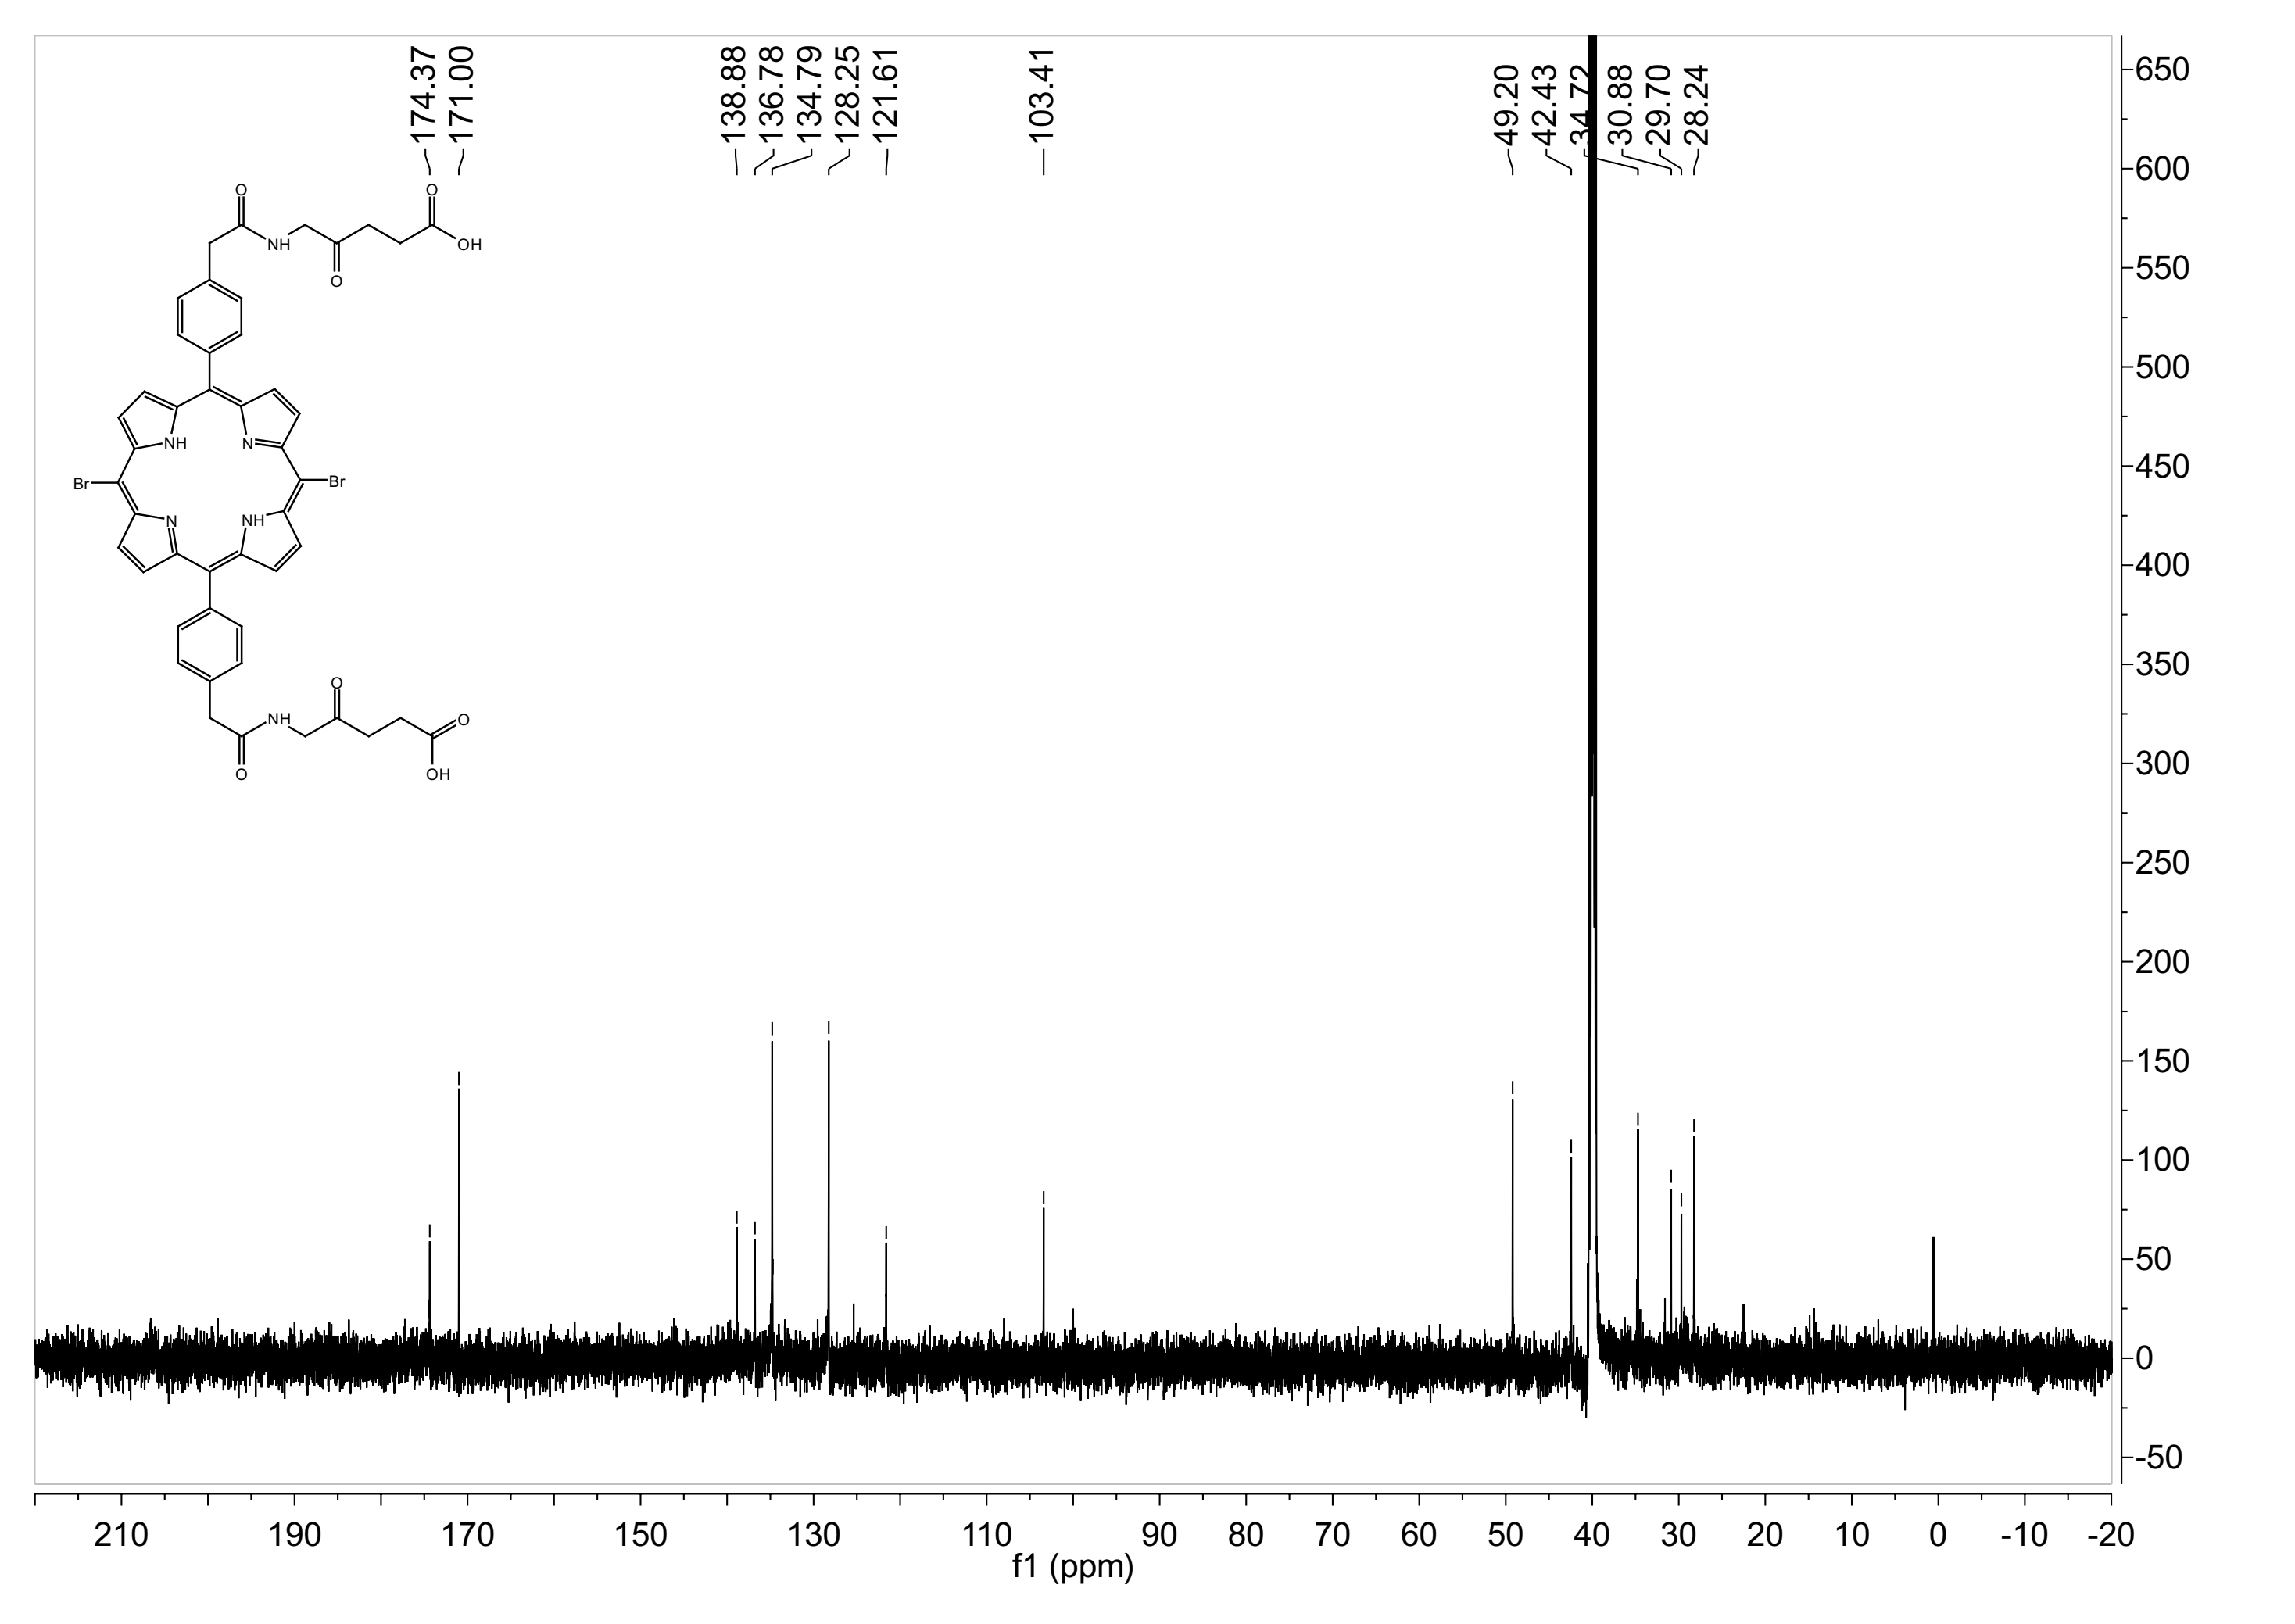


**Figure S23-2.** 13C NMR (DMSO-*d*6,151 MHz) of **II2**


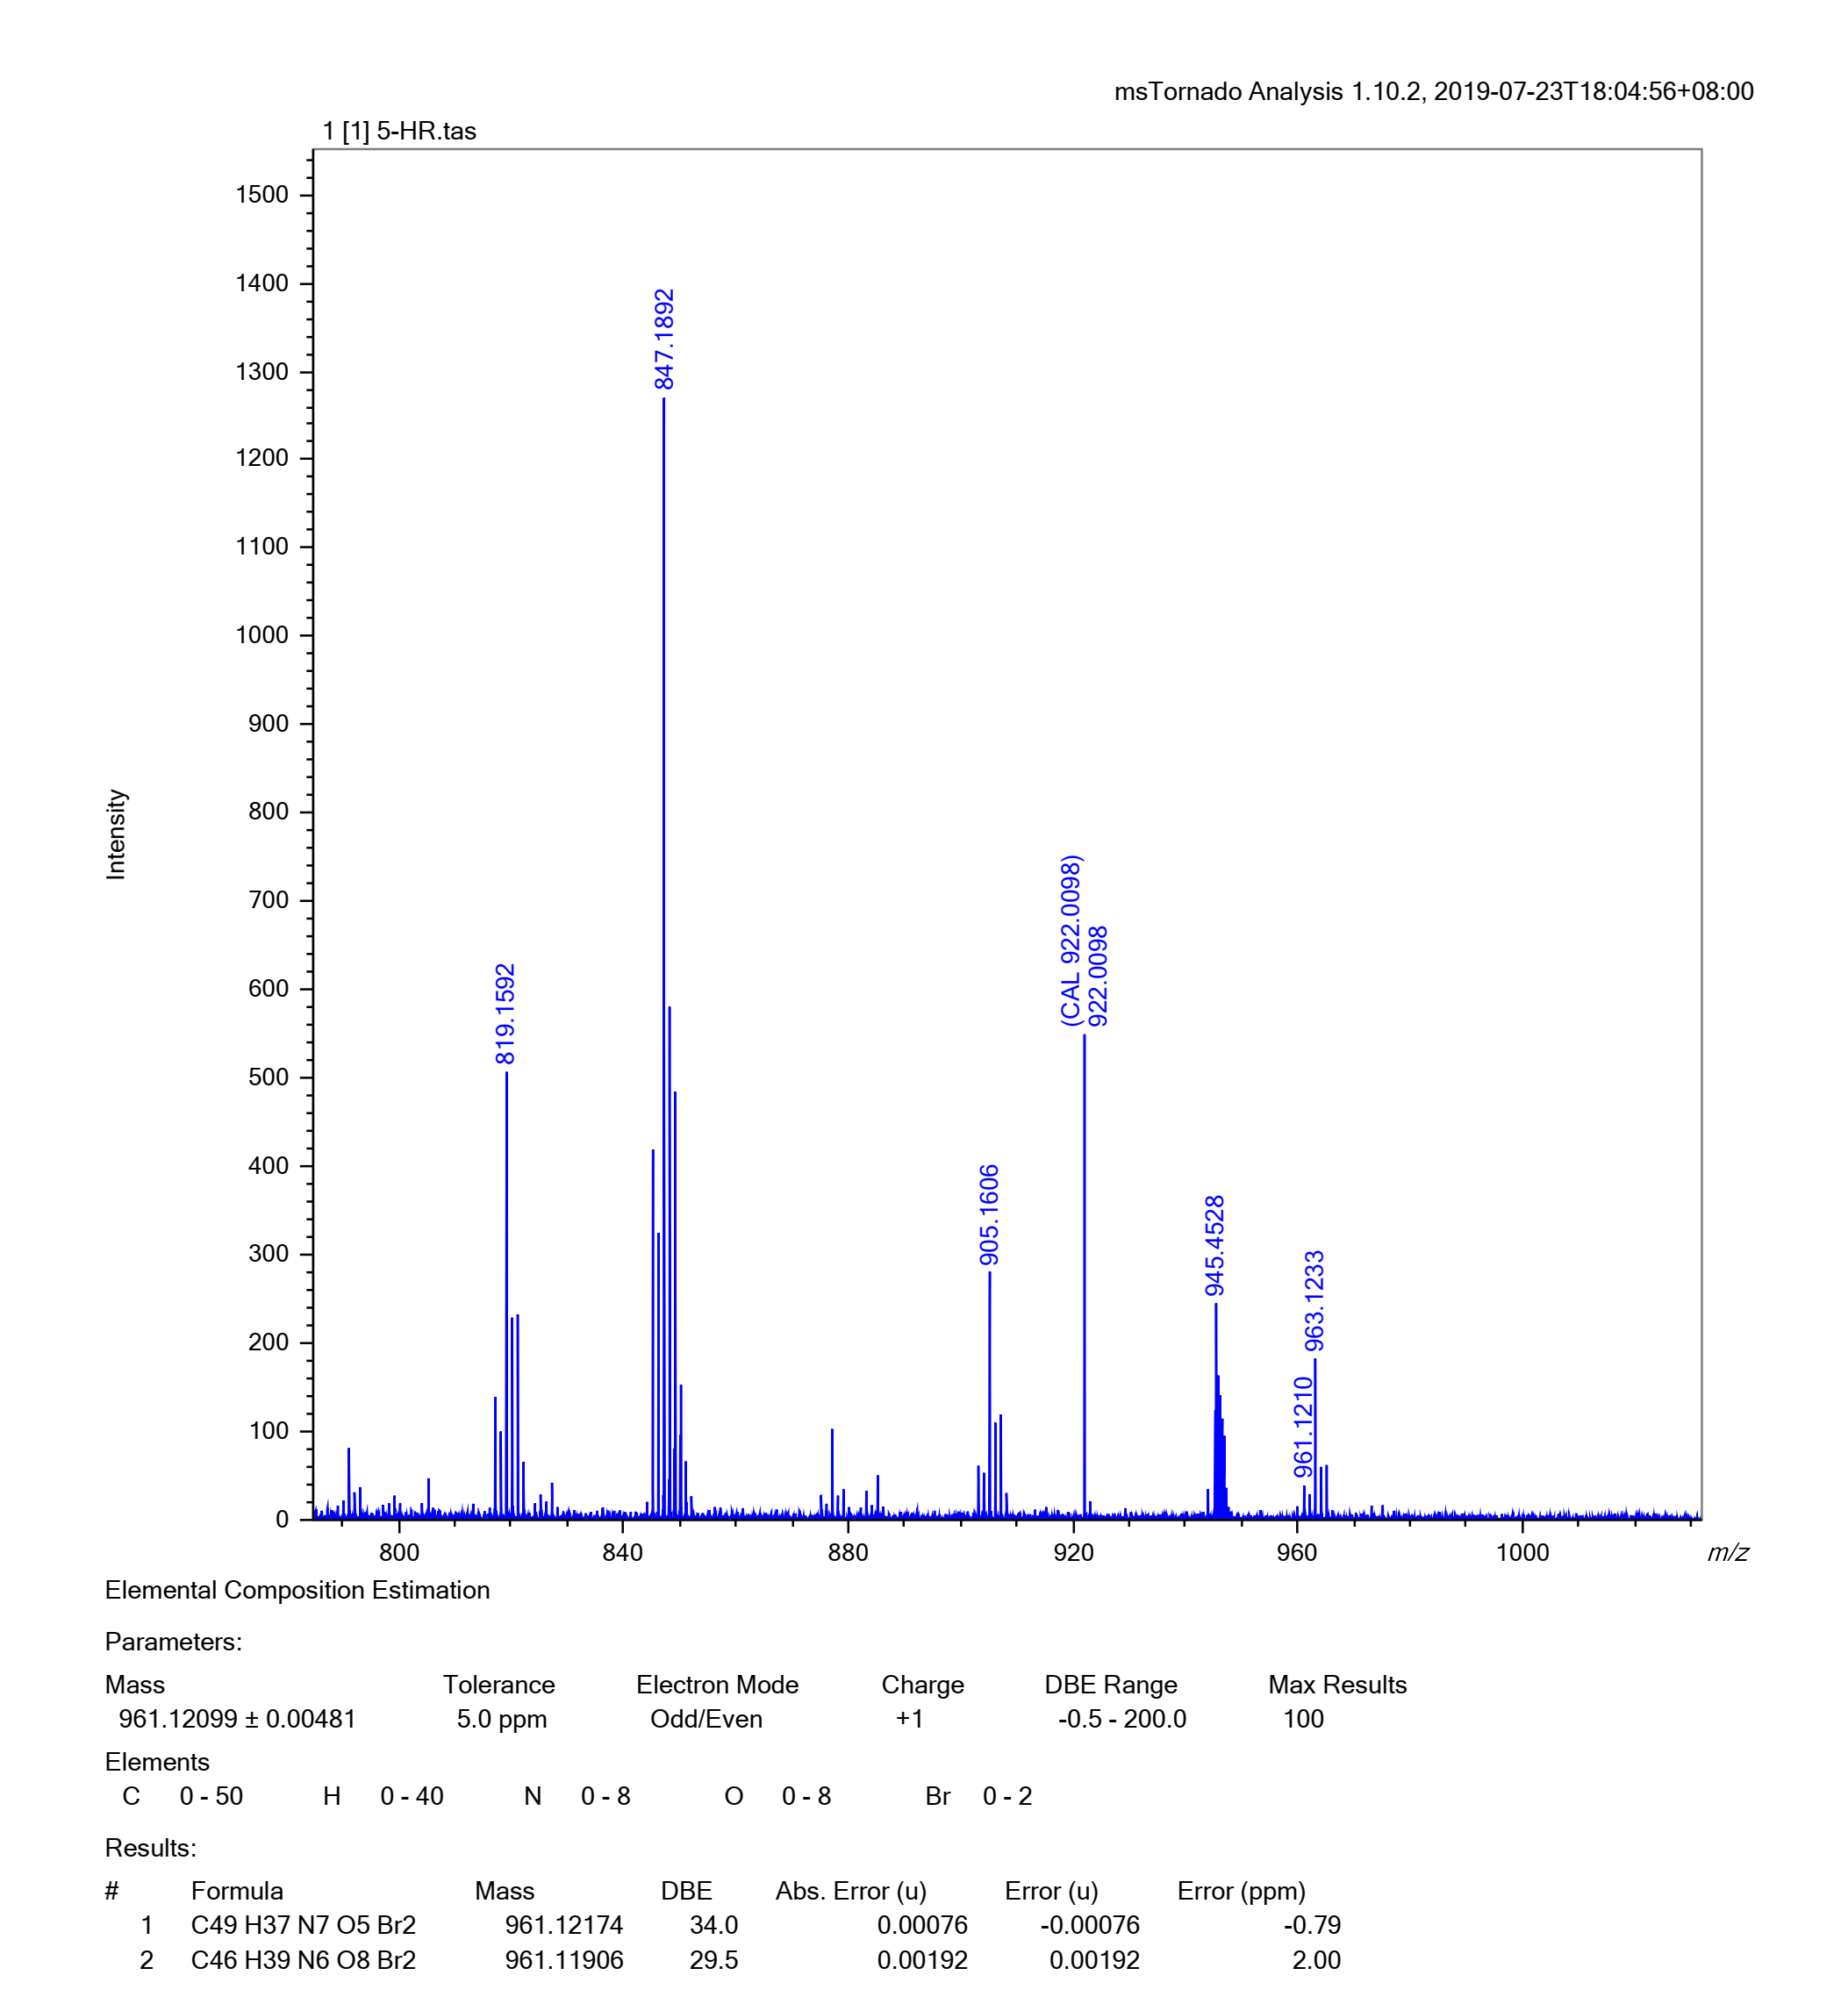


**Figure S23-3.** HRMS (MALDI-TOF) of **II2**


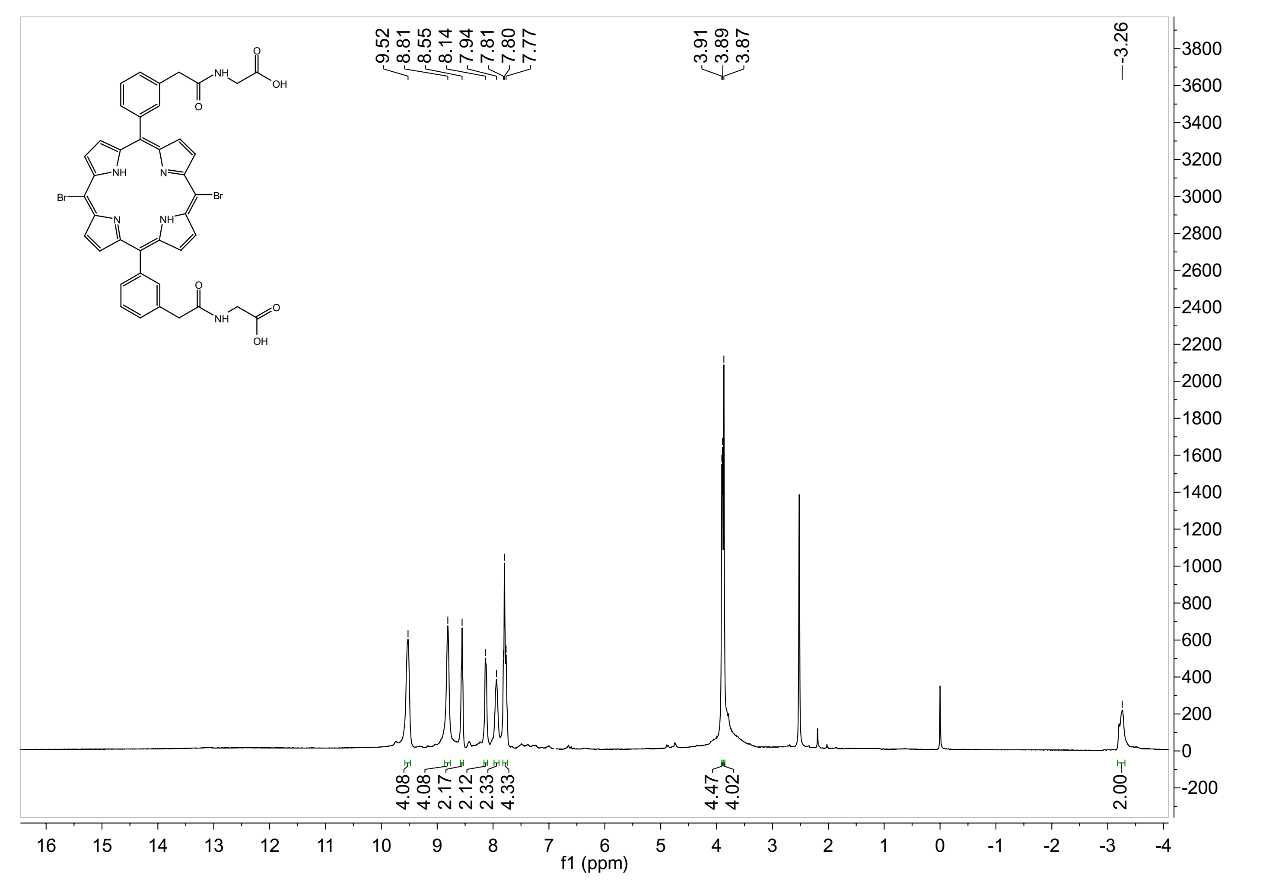


**Figure S24-1.** 1H NMR (DMSO-*d*6,400 MHz) of **II3**


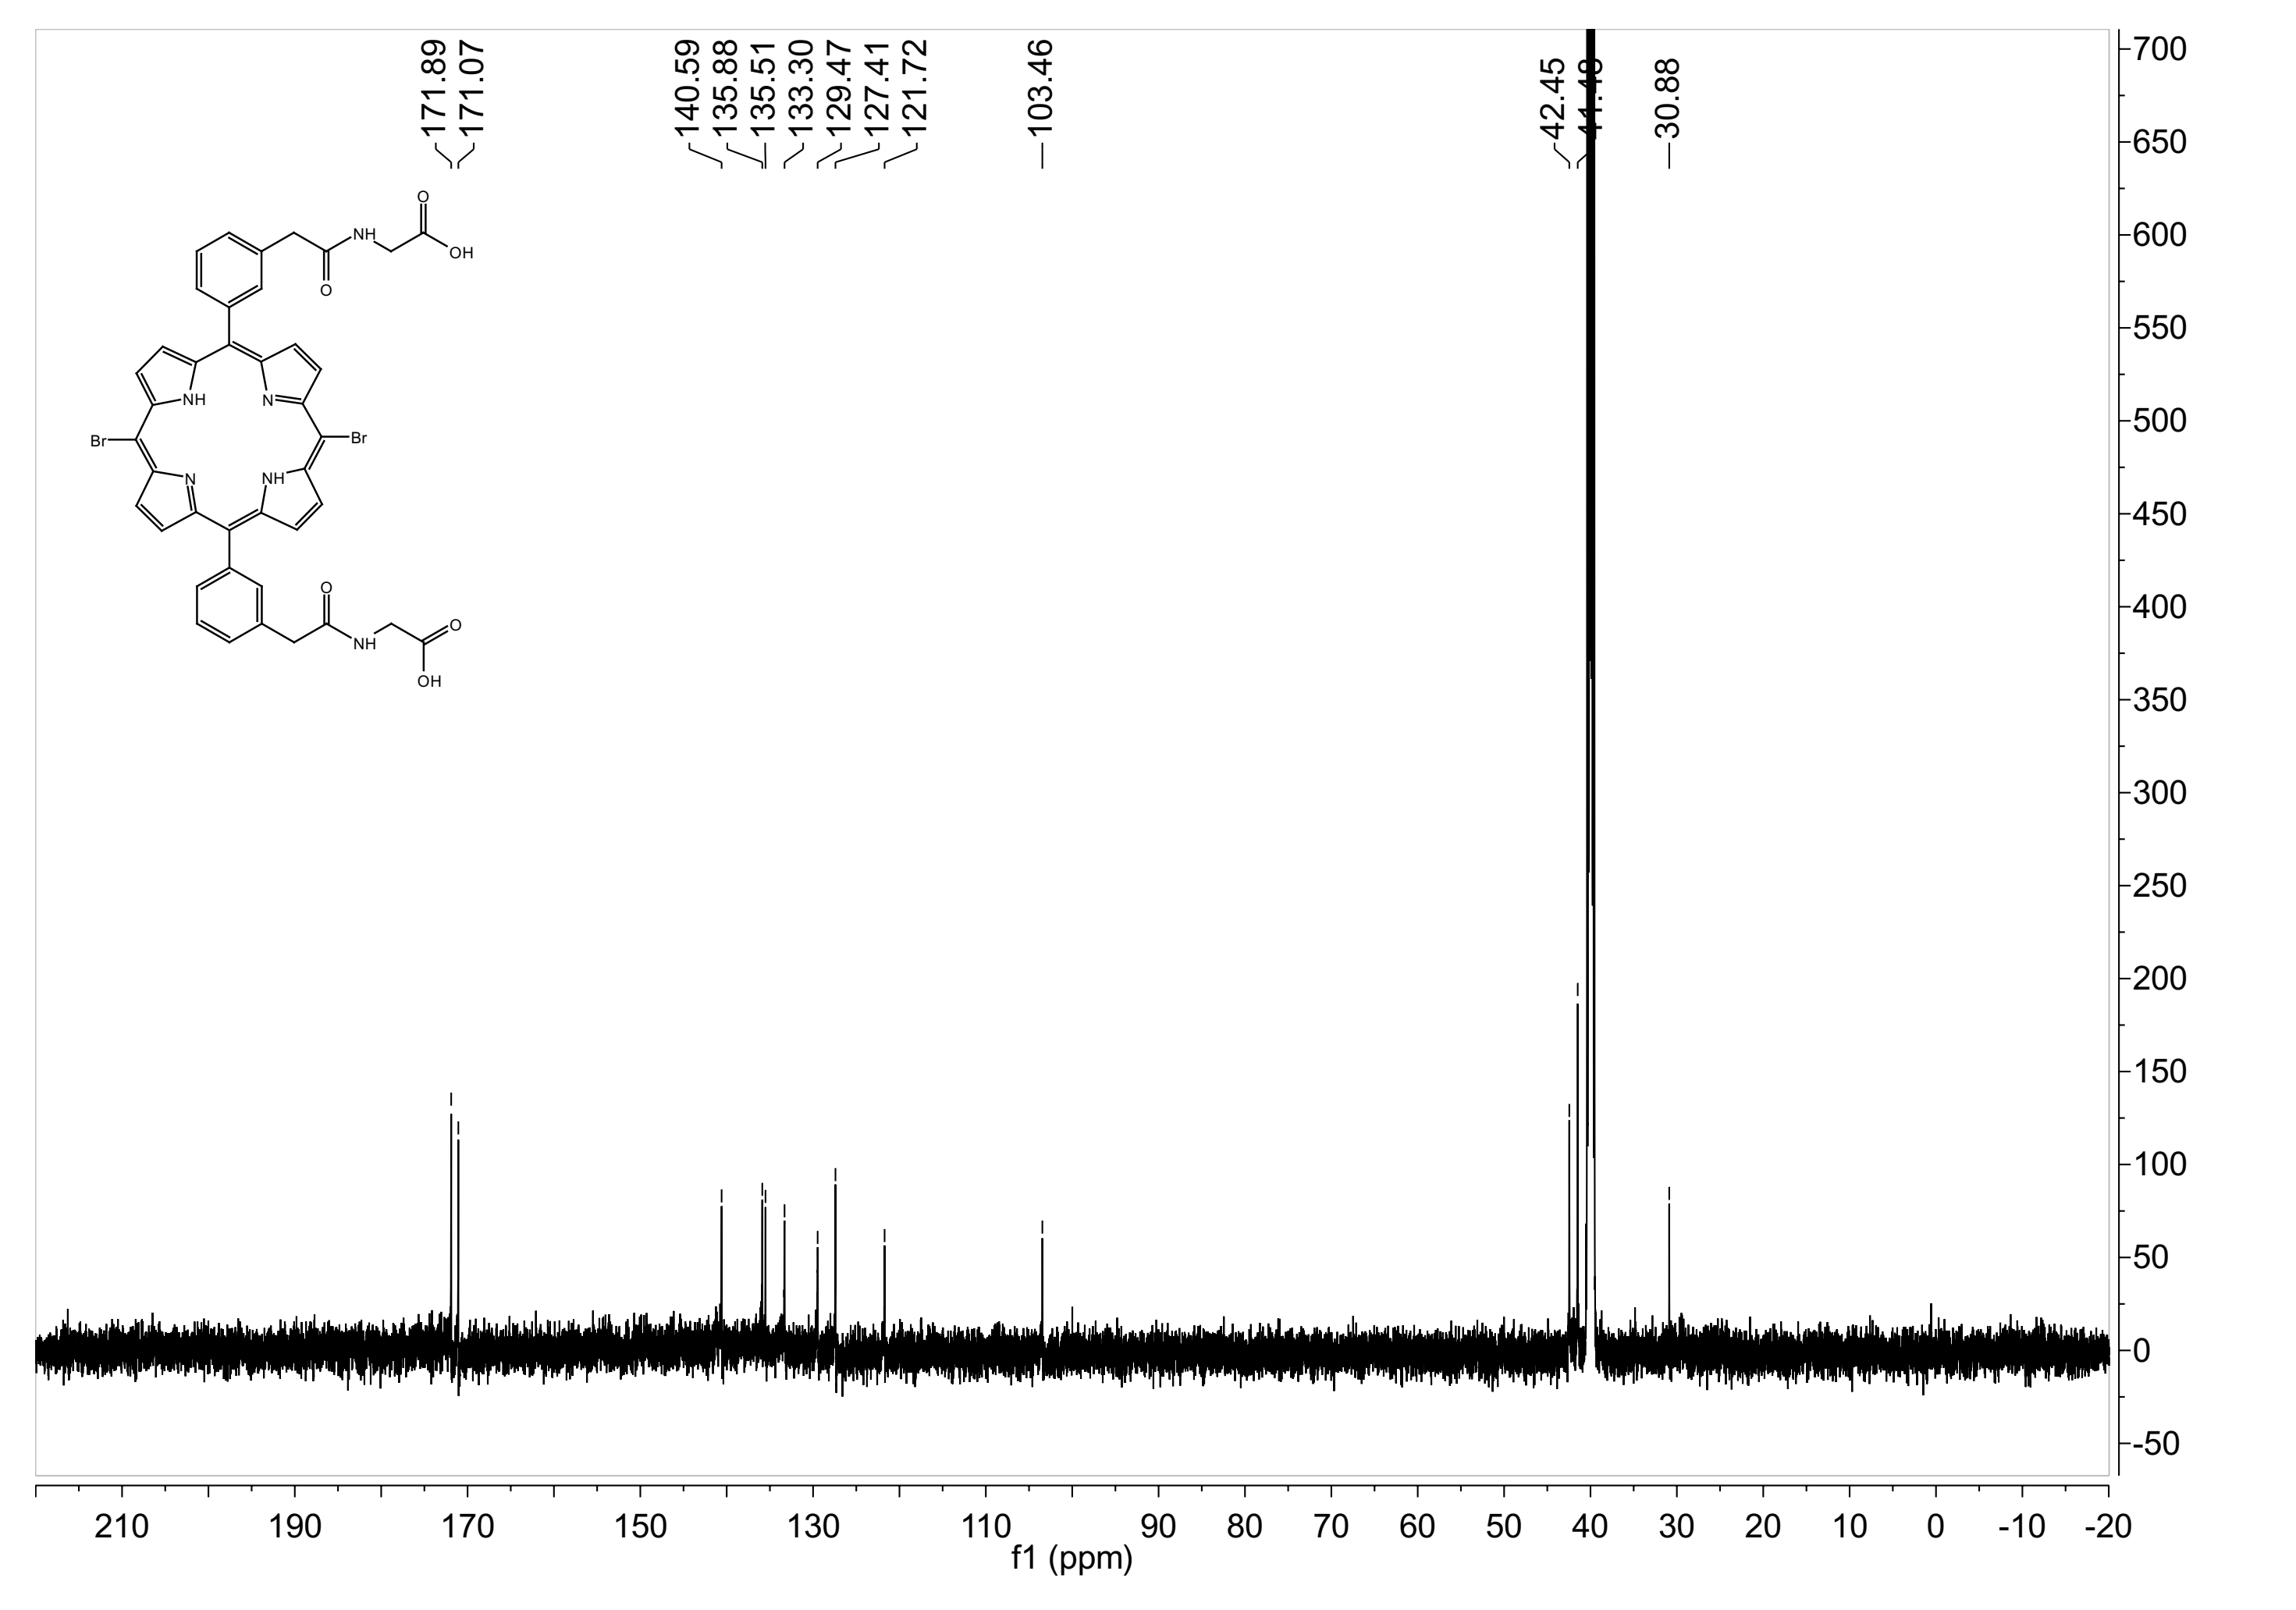


**Figure S24-2.** 13C NMR (DMSO-*d*6,151 MHz) of **II3**


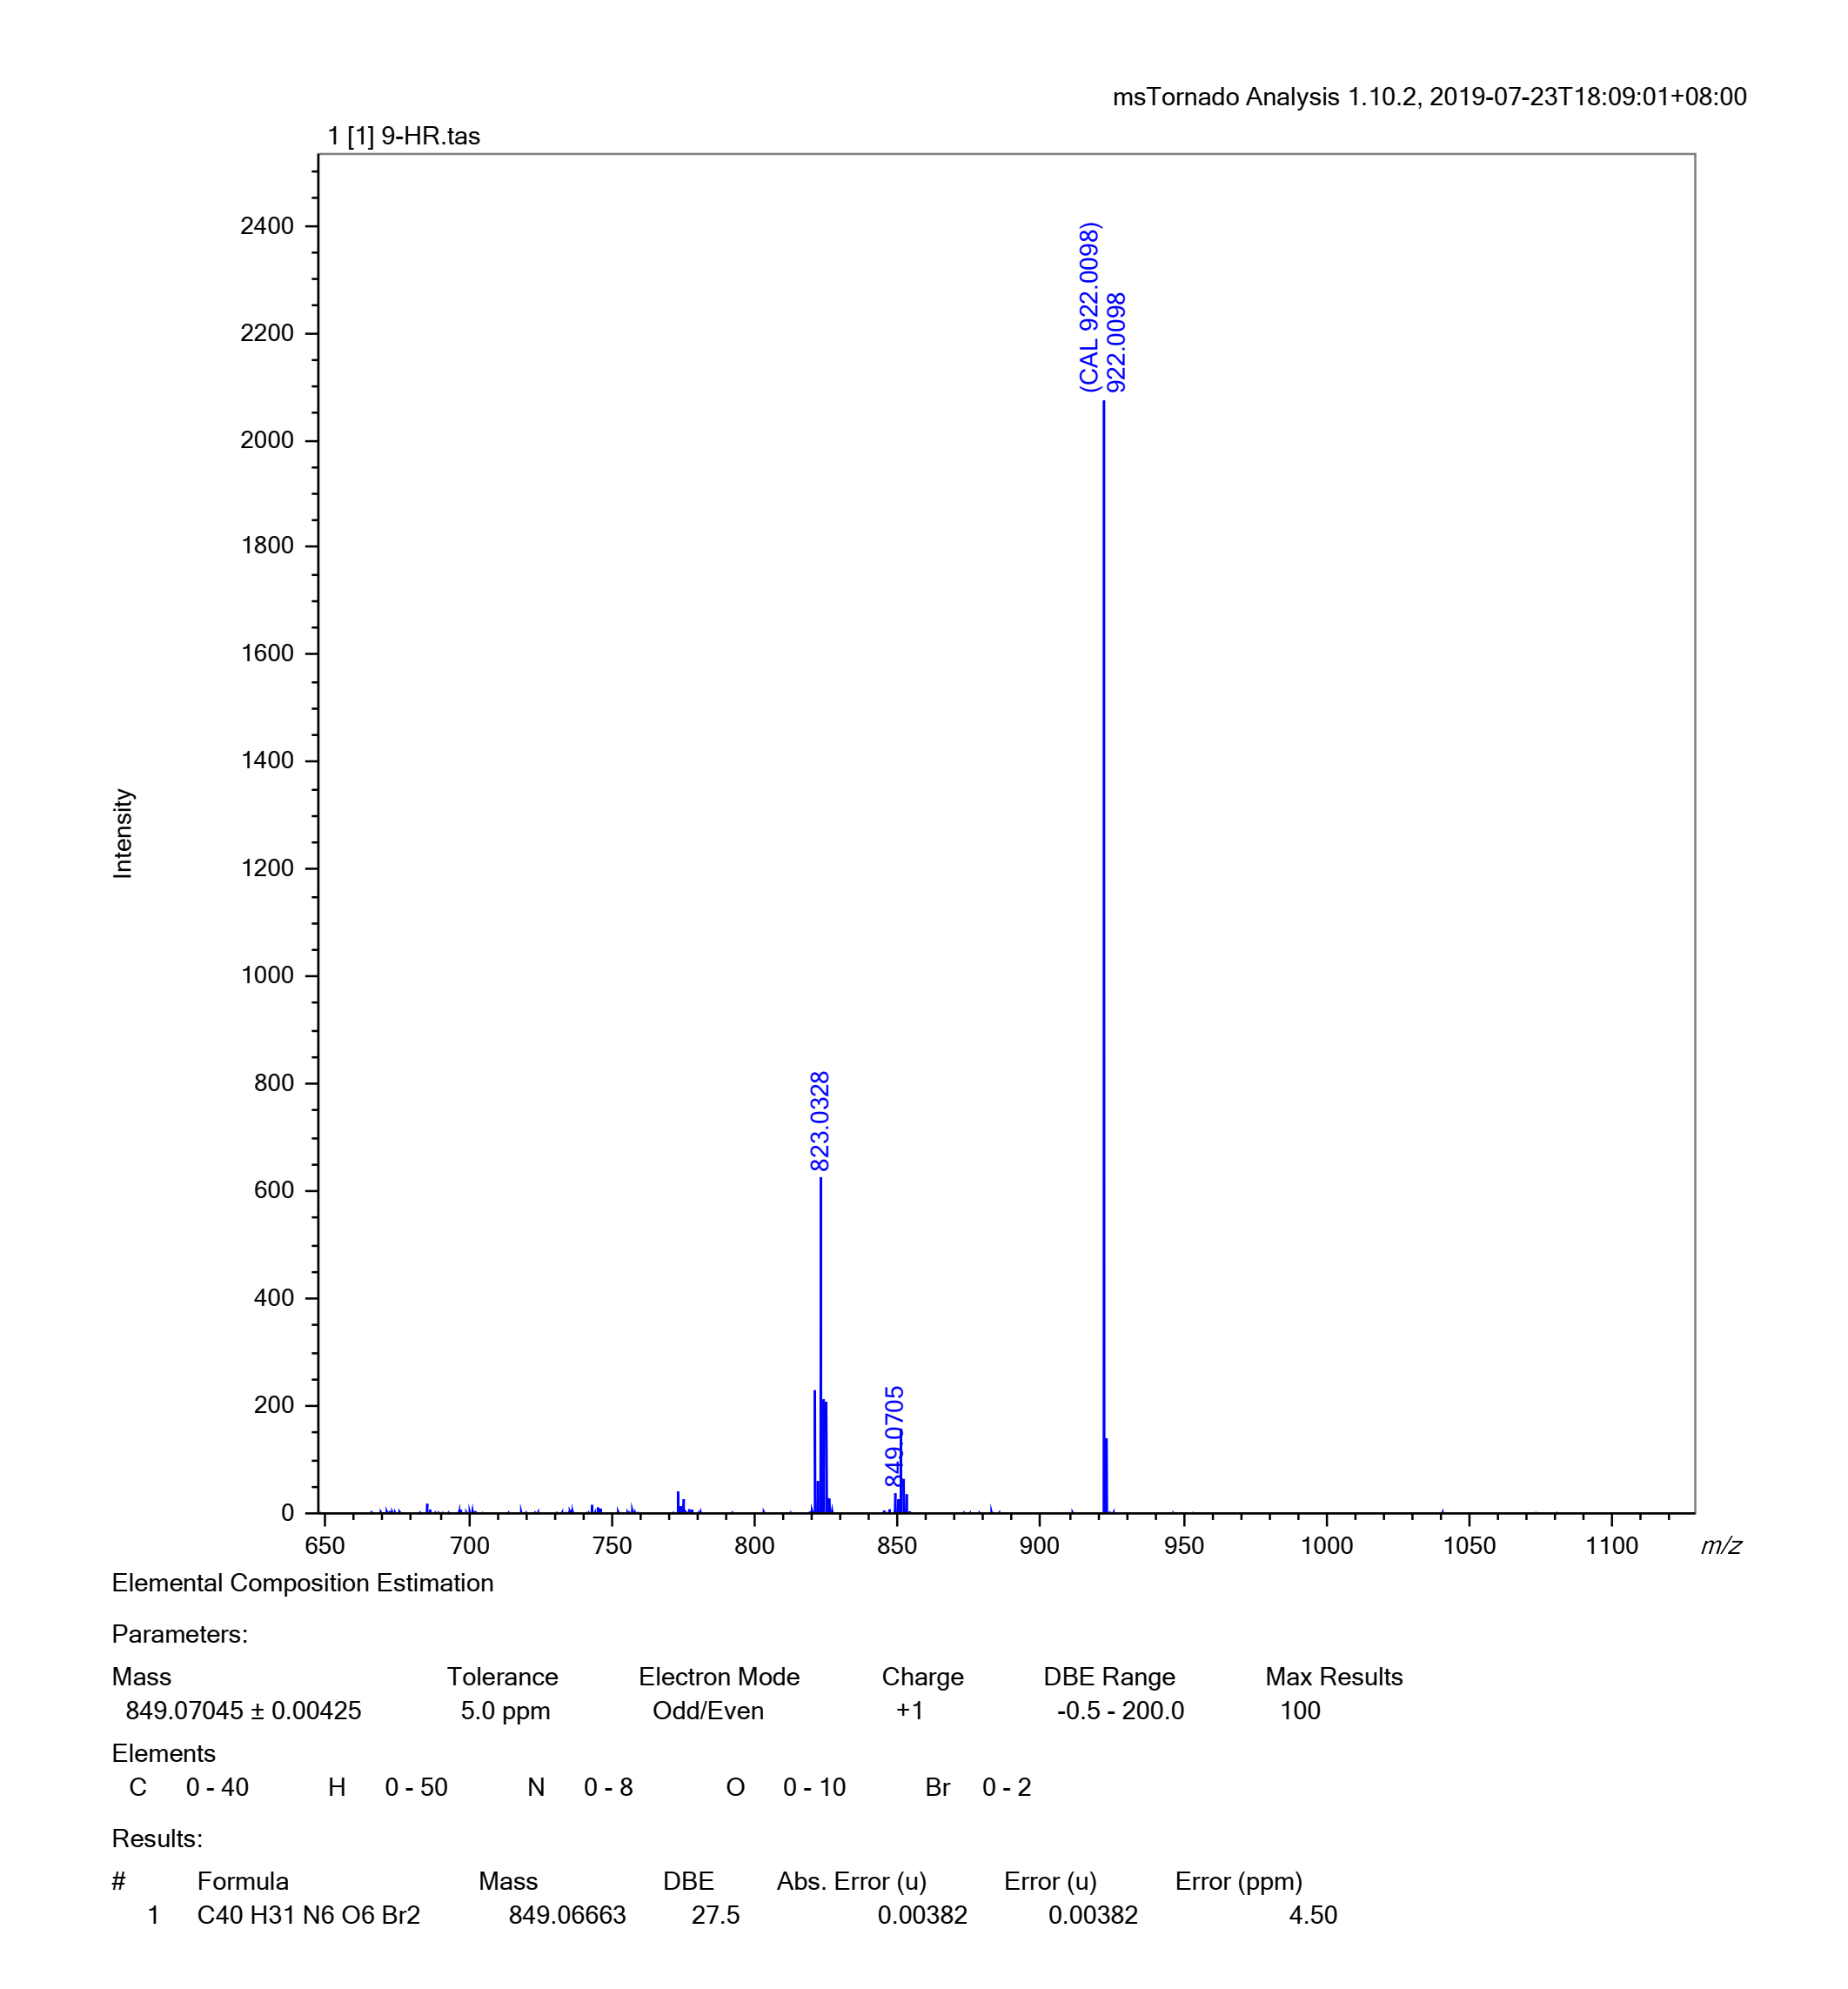


**Figure S24-3.** HRMS (MALDI-TOF) of **II3**


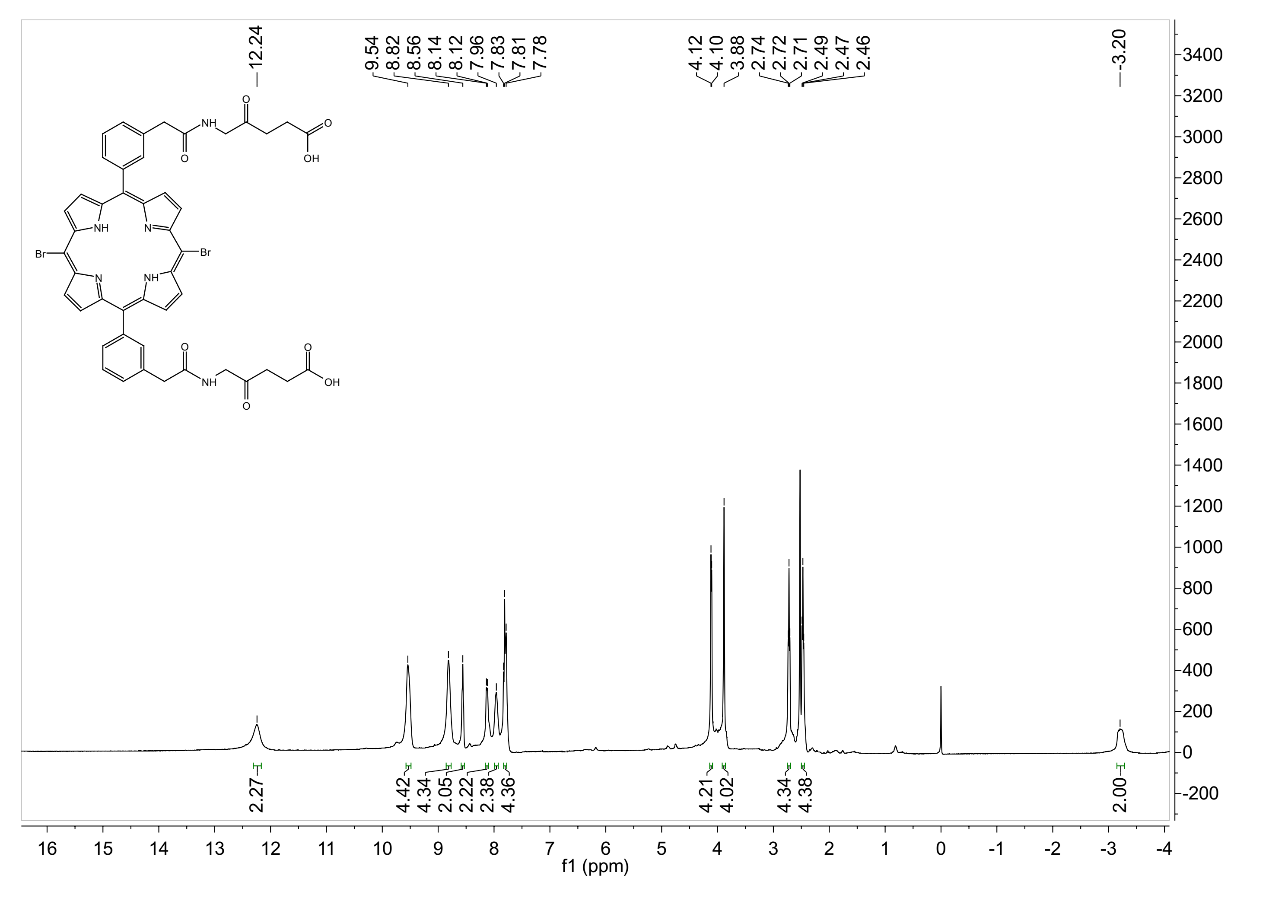


**Figure S25-1.** 1H NMR (DMSO-*d*6,400 MHz) of **II4**


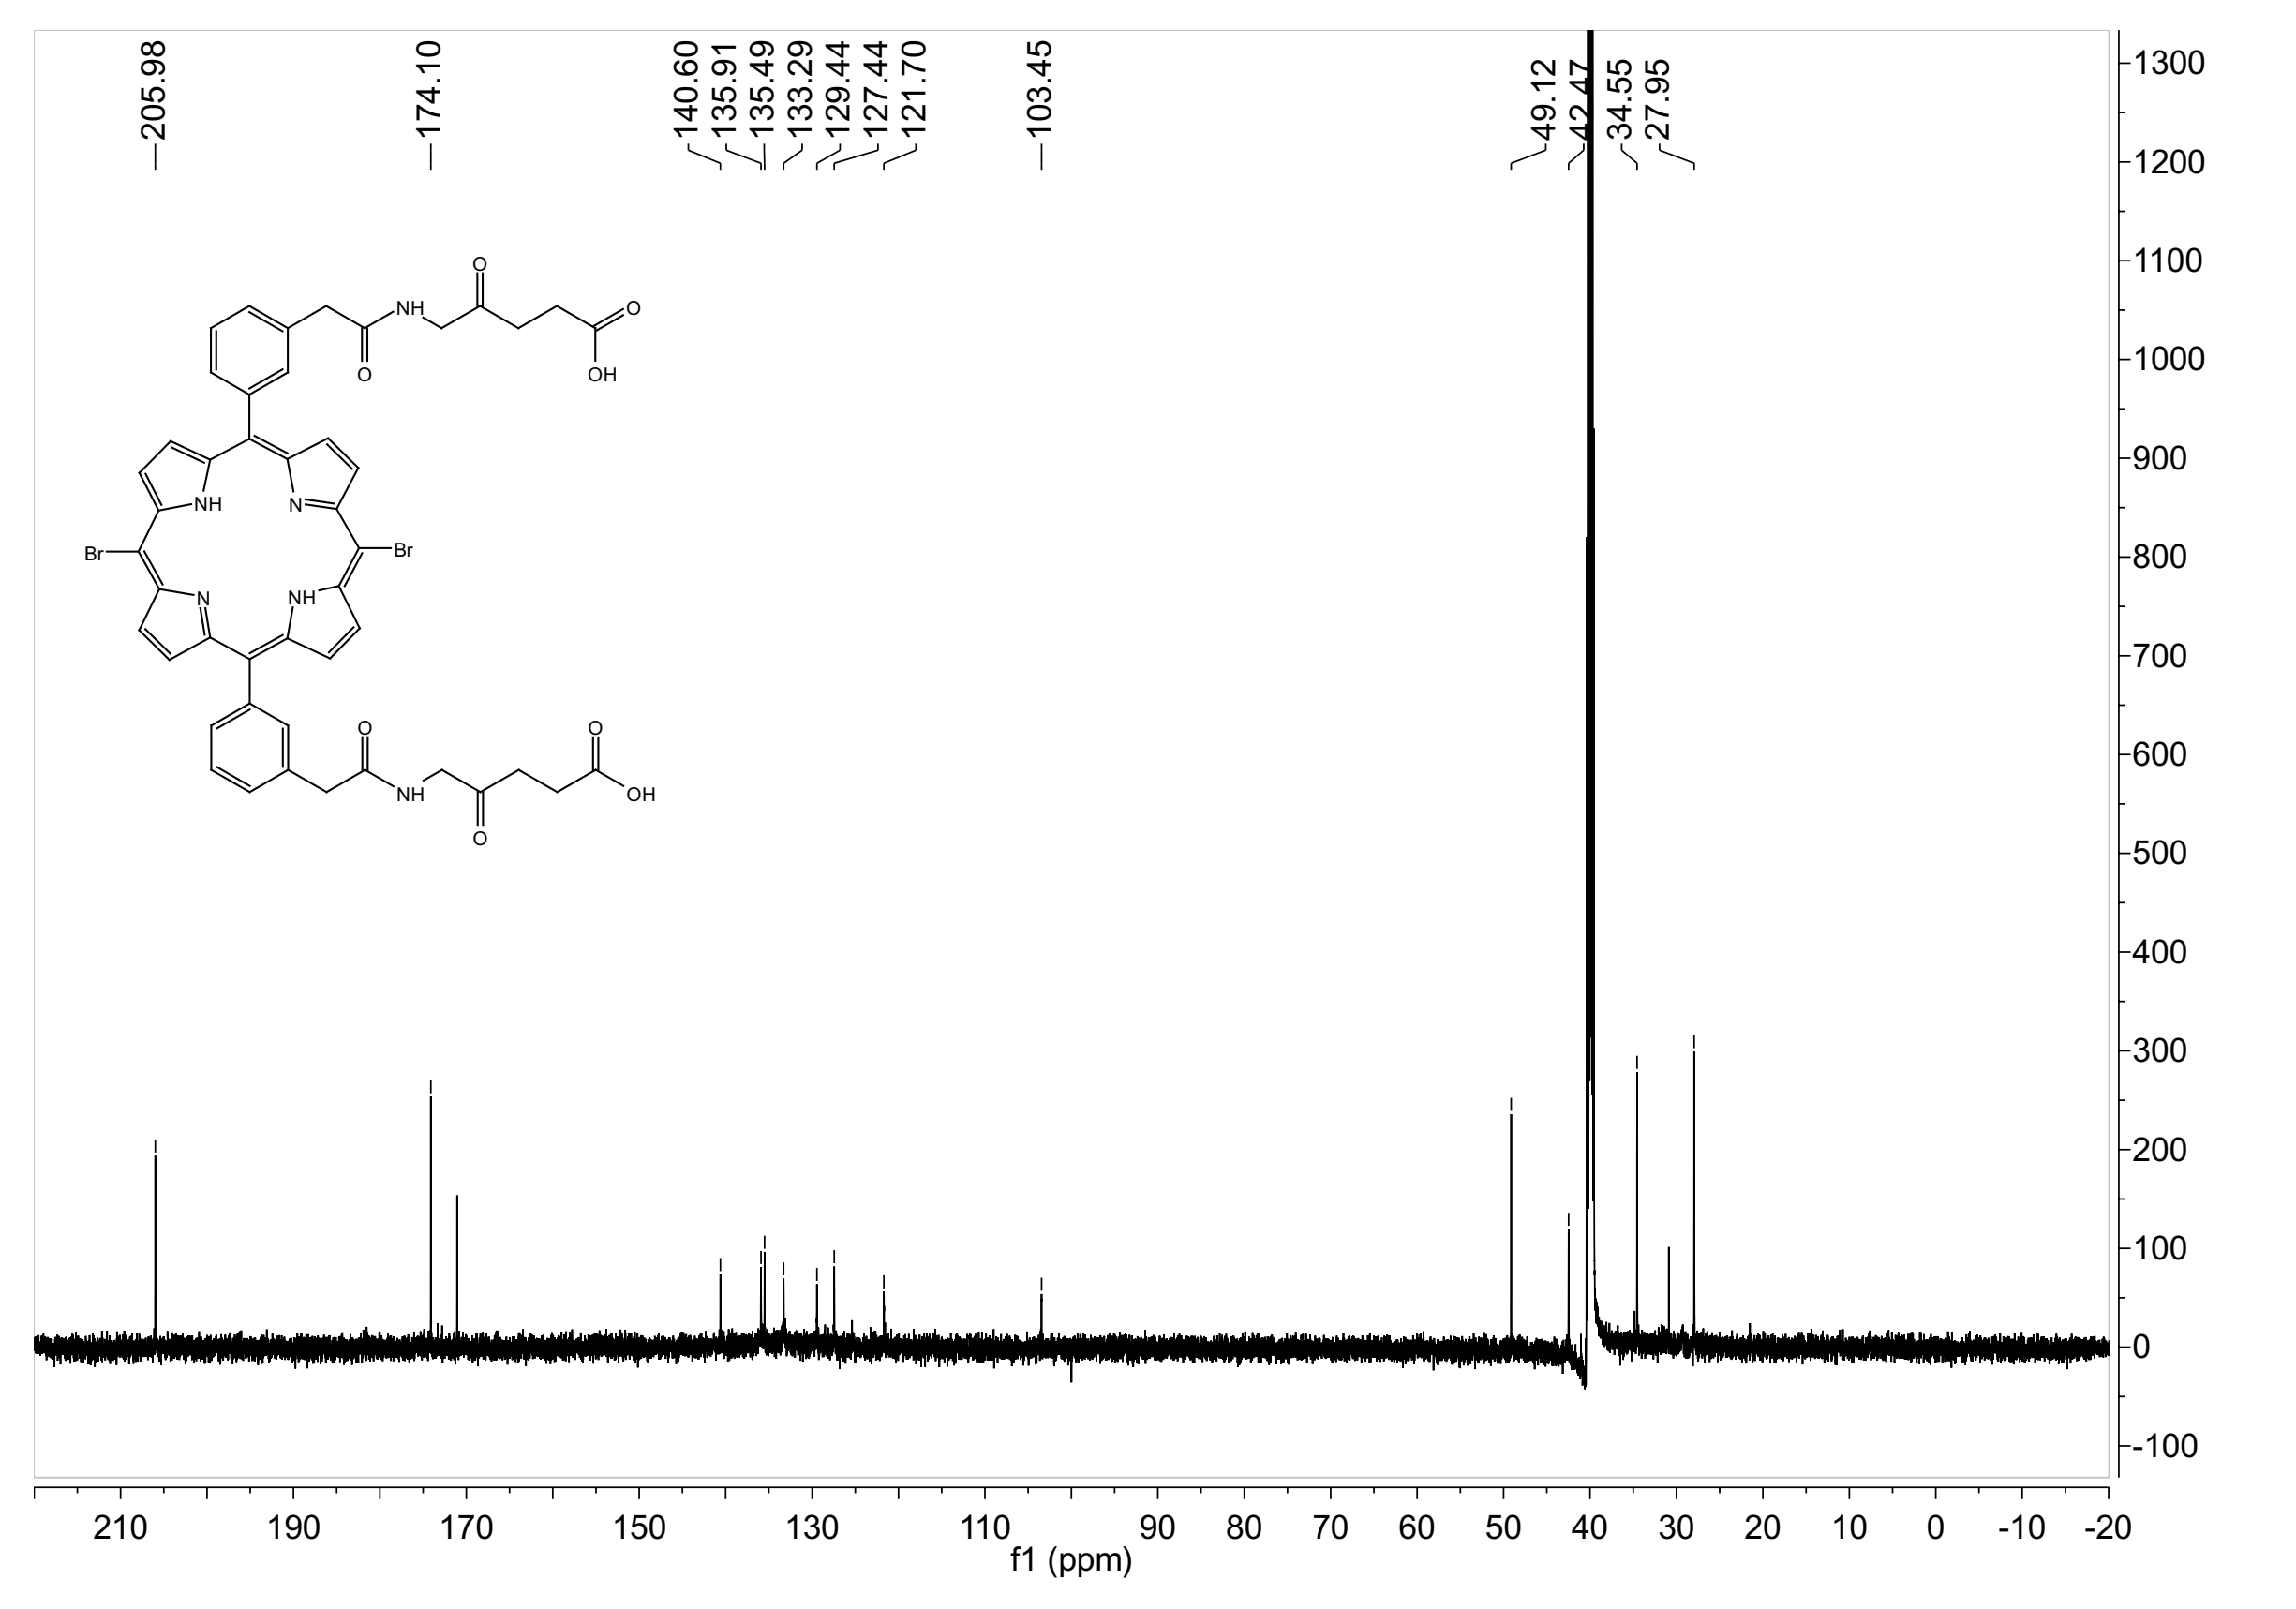


**Figure S25-2.** 13C NMR (DMSO-*d*6,151 MHz) of **II4**


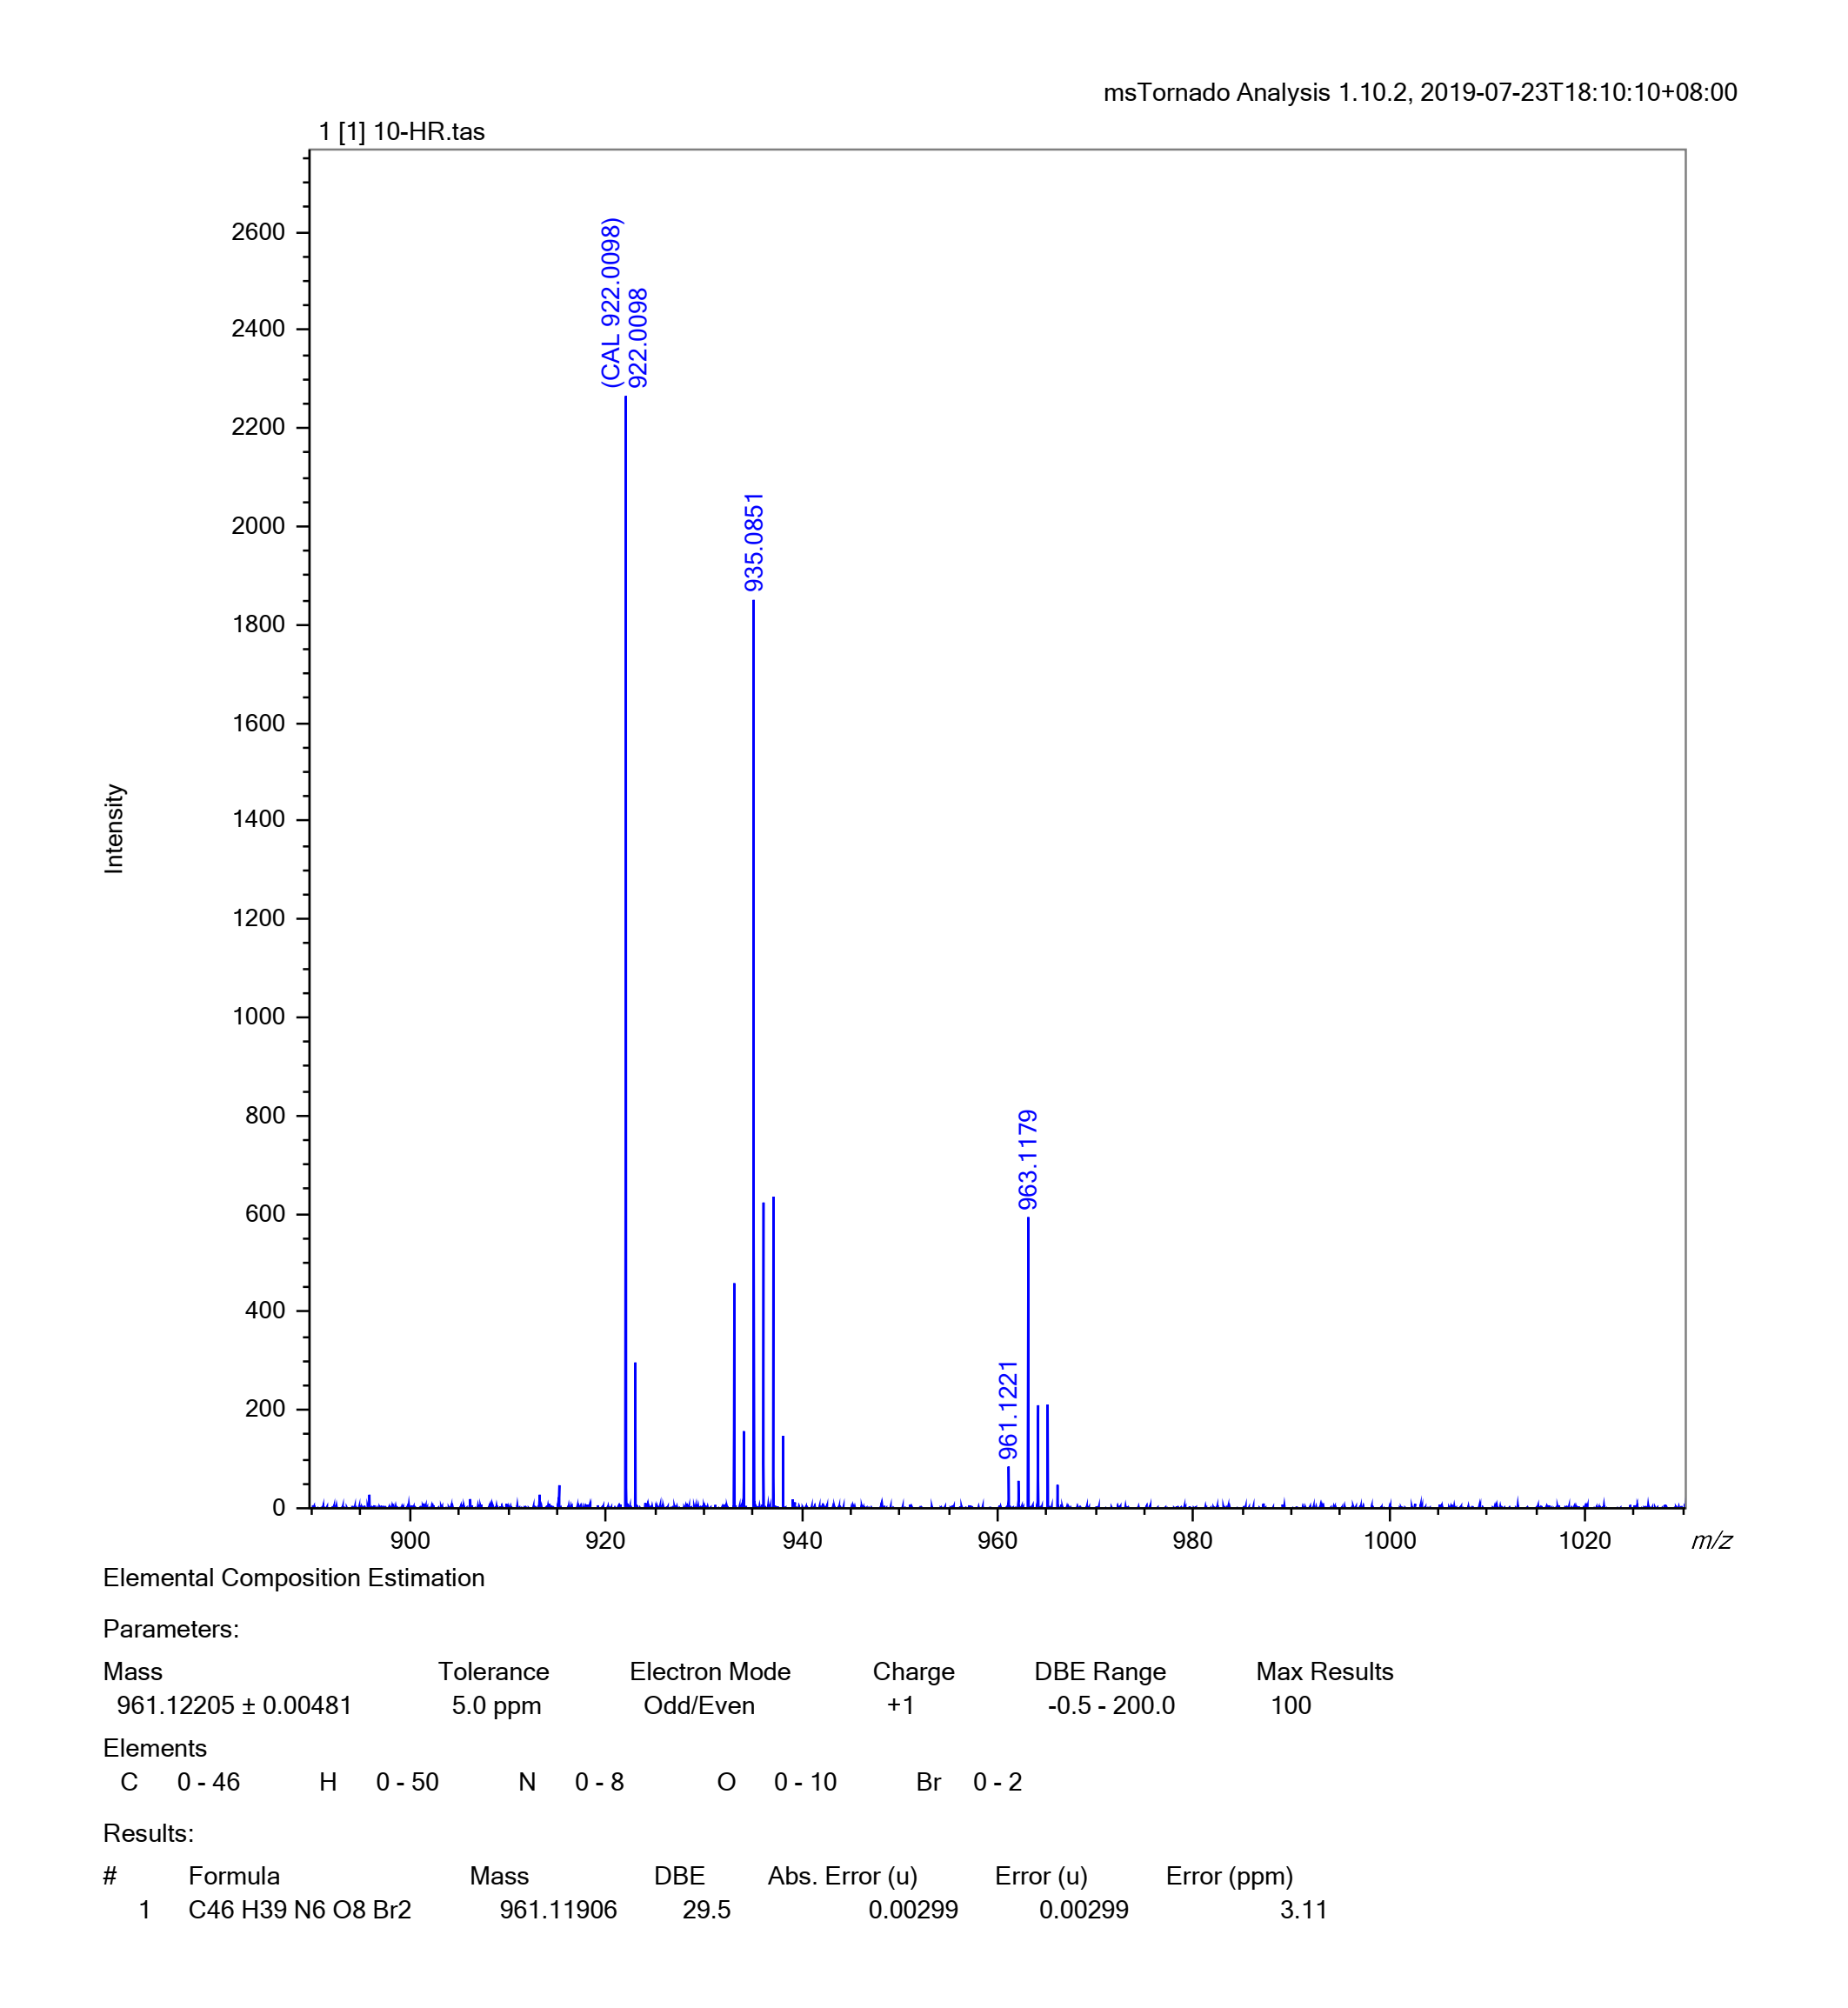


**Figure S25-3.** HRMS (MALDI-TOF) of **II4**

**Photodynamic Activities**


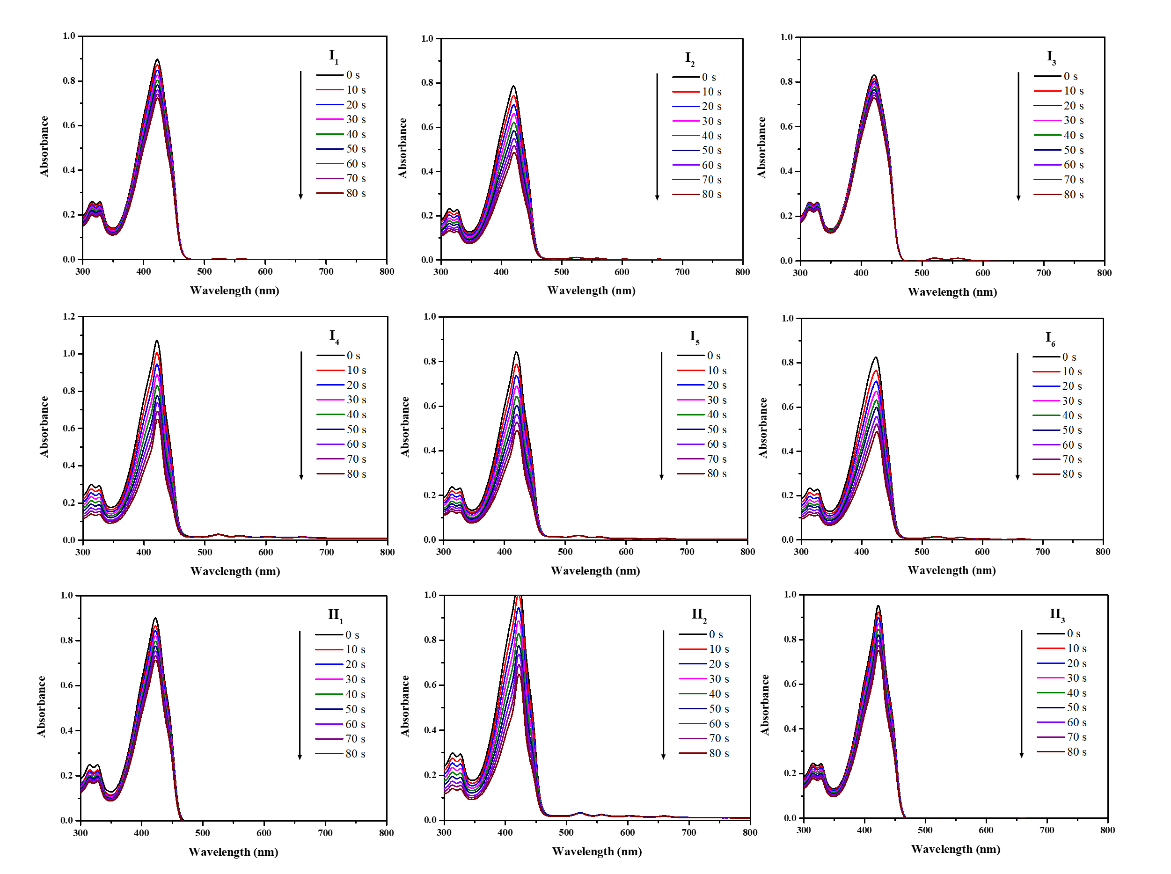


**Figure S26.** Photodecomposition of DPBF in the presence of different compounds under 650 nm laser irradiation.


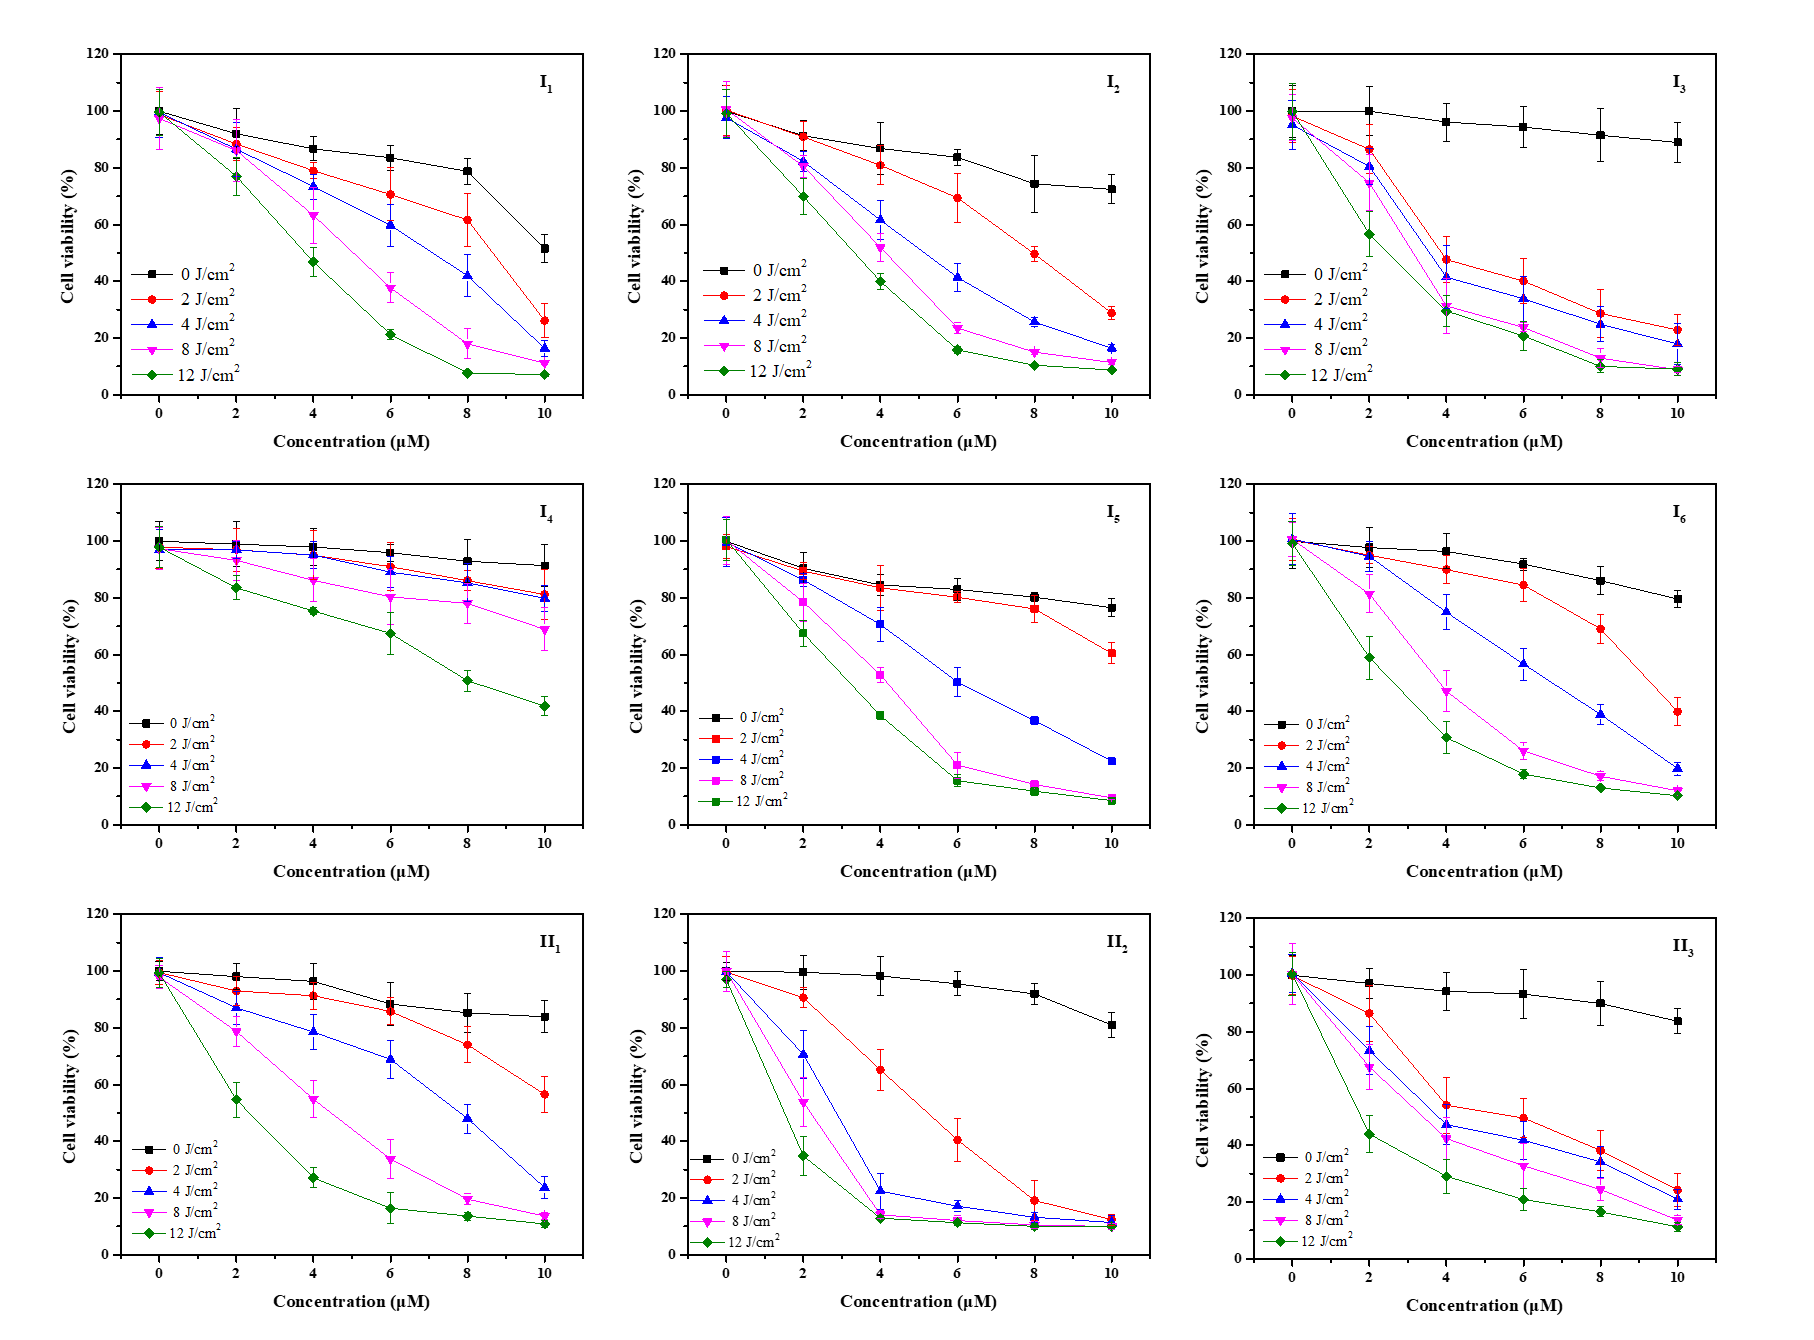


**Figure S27.** Light-dependent cytotoxicity of the target compounds assessed with different light doses (2, 4, 8, 12 J/cm2) and different concentrations toward Eca-109 cells.
